# Supplementary material for: Combination of Everolimus and Bortezomib Inhibits the Growth and Metastasis of Bone and Soft Tissue Sarcomas via JNK/p38/ERK MAPK and AKT Pathways
Source: MDPI journal article supplement (doi:10.3390/cancers15092468), 2023-04-26
Supplement: s1 [file s1]

Western Blot data

# HT1080 treatment 6 h, 12 h

## Treatment time 6 h

- 1. Everolimus 0  $\mu\text{M}$
- 2. Everolimus 5  $\mu\text{M}$
- 3. Everolimus 10  $\mu\text{M}$
- 4. Everolimus 20  $\mu\text{M}$
- 5. Everolimus 0  $\mu\text{M}$       Bortezomib 5nM
- 6. Everolimus 5  $\mu\text{M}$       Bortezomib 5nM
- 7. Everolimus 10  $\mu\text{M}$       Bortezomib 5nM
- 8. Everolimus 20  $\mu\text{M}$       Bortezomib 5nM

## Treatment time 12 h

- 9. Everolimus 0  $\mu\text{M}$
- 10. Everolimus 5  $\mu\text{M}$
- 11. Everolimus 10  $\mu\text{M}$
- 12. Everolimus 20  $\mu\text{M}$
- 13. Everolimus 0  $\mu\text{M}$       Bortezomib 5nM
- 14. Everolimus 5  $\mu\text{M}$       Bortezomib 5nM
- 15. Everolimus 10  $\mu\text{M}$       Bortezomib 5nM
- 16. Everolimus 20  $\mu\text{M}$       Bortezomib 5nM

# HT1080 6 h 12 h treatment $\beta$ actin

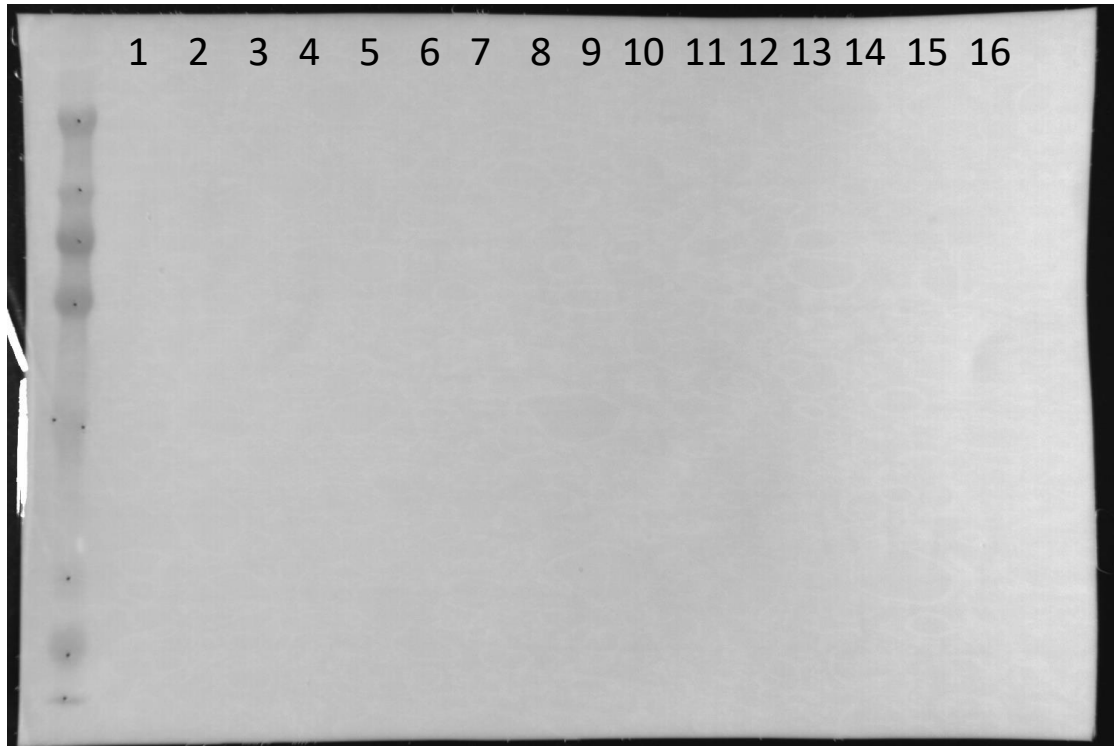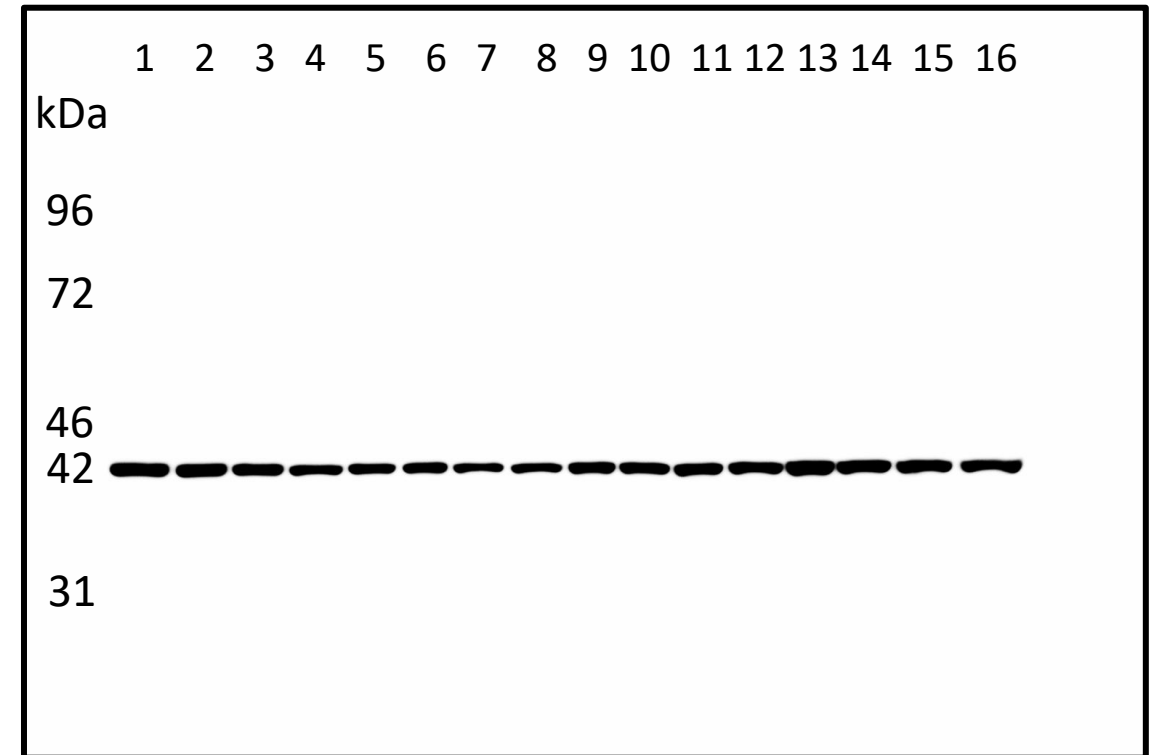

100:77:78:64:54:42:50:59:60:69:71:67:74:79:69:62

# HT1080 6 h 12 h treatment BLK

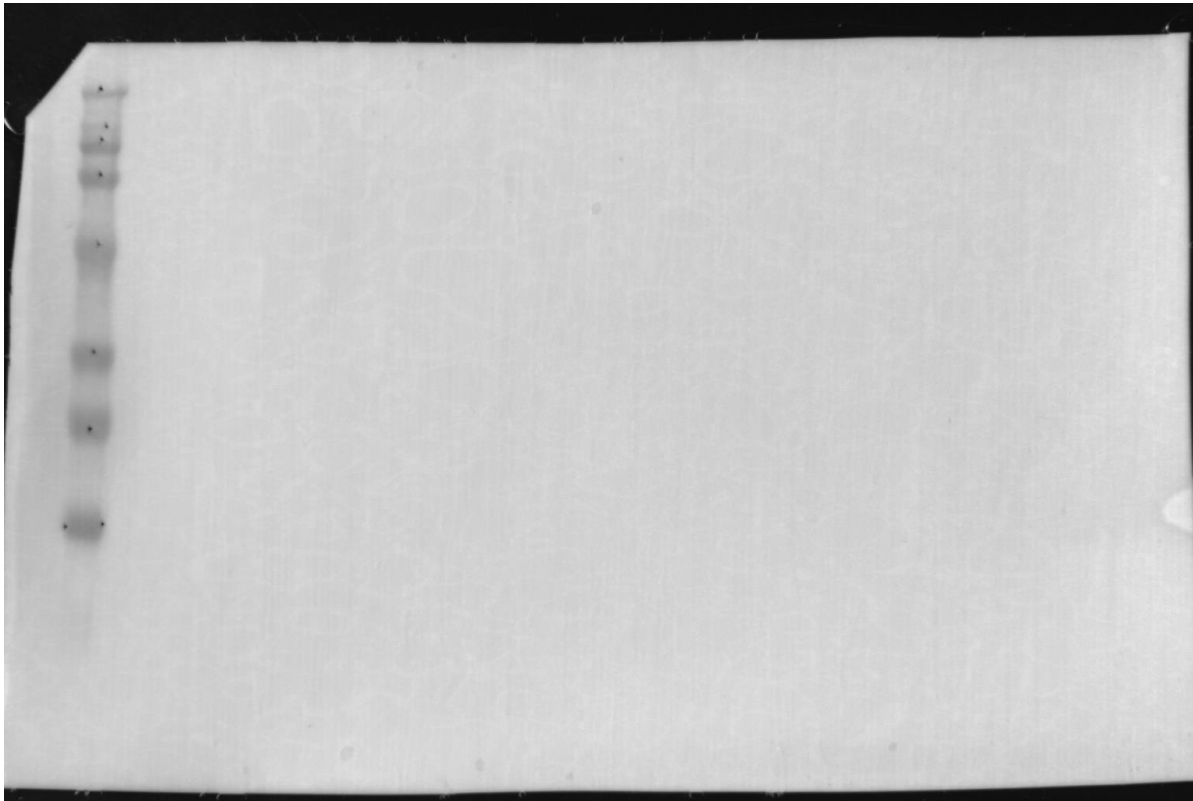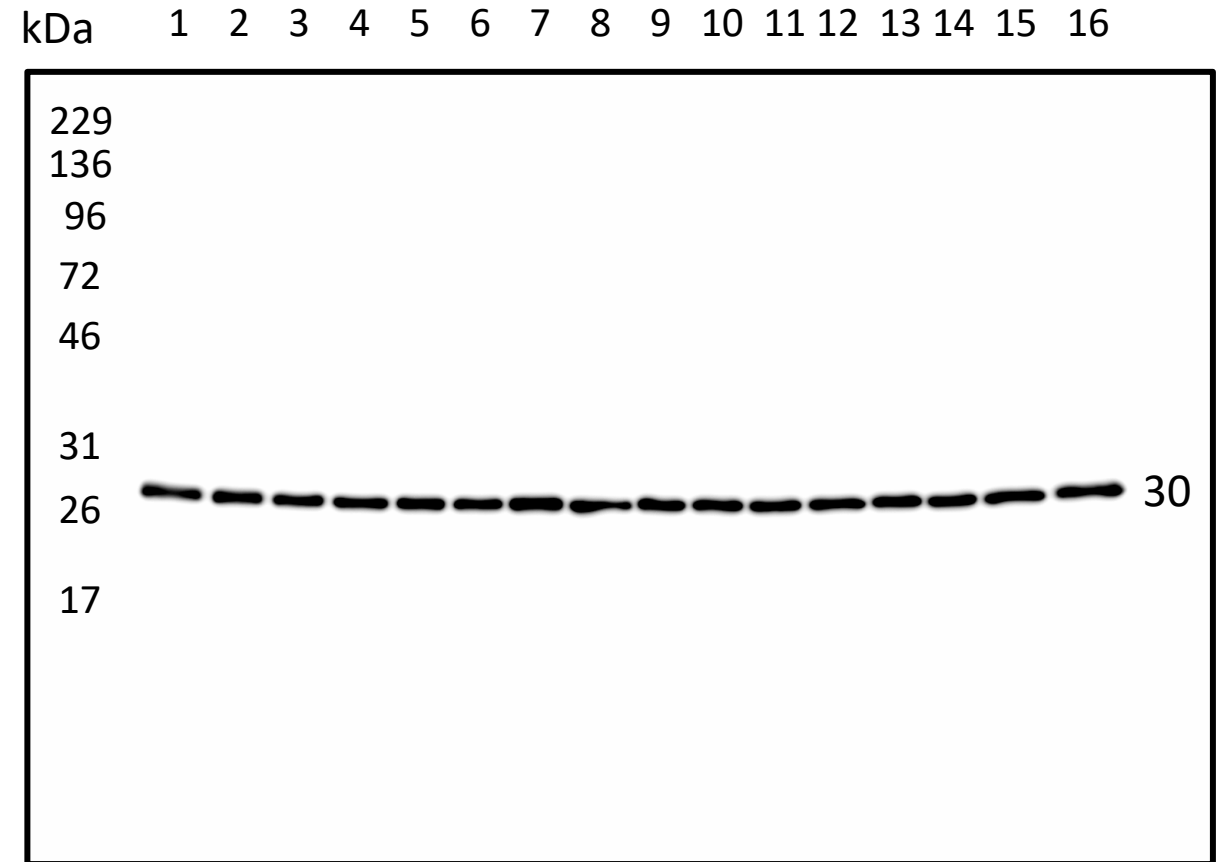

100:99:94:136:90:82:150:112:76:88:86:119:99:90:124:158

# HT1080 6 h 12 h treatment cleaved caspase 9

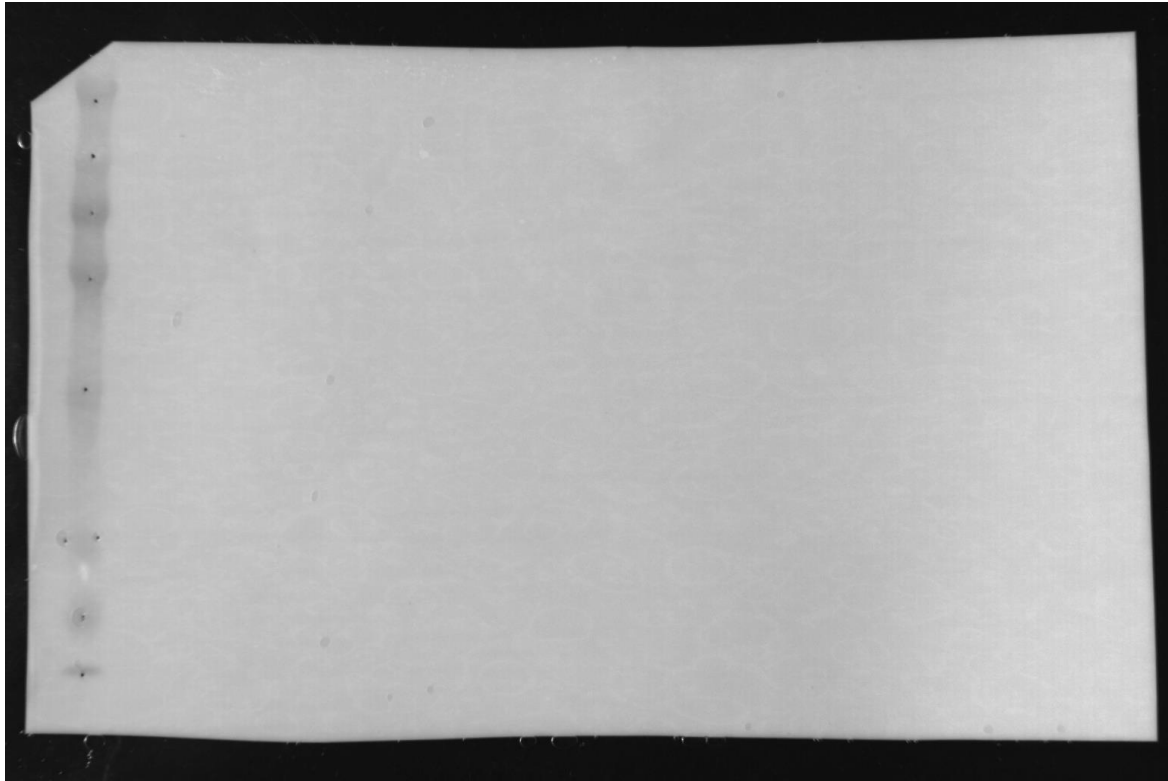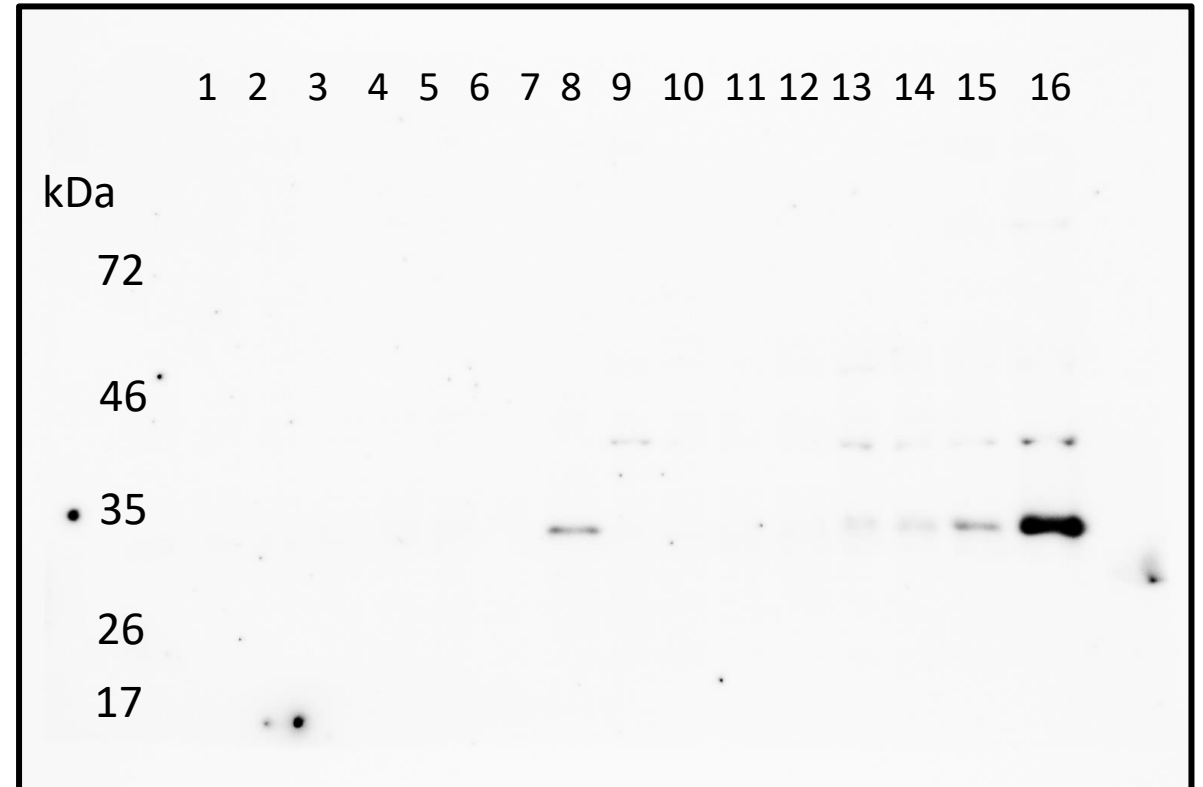

0:0:0:0:0:0:0:4:0:0:0:0:0:1:4:100

# HT1080 6 h 12 h treatment cleaved caspase 8

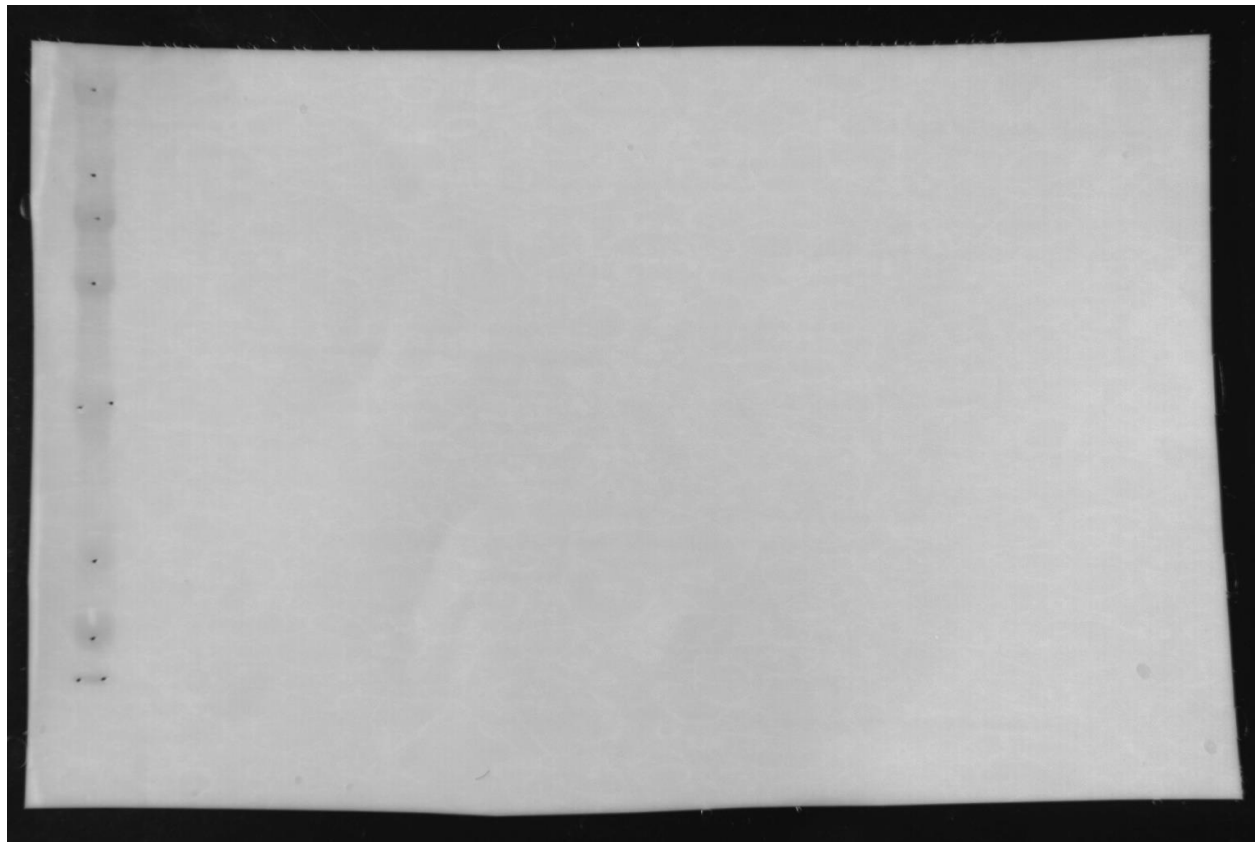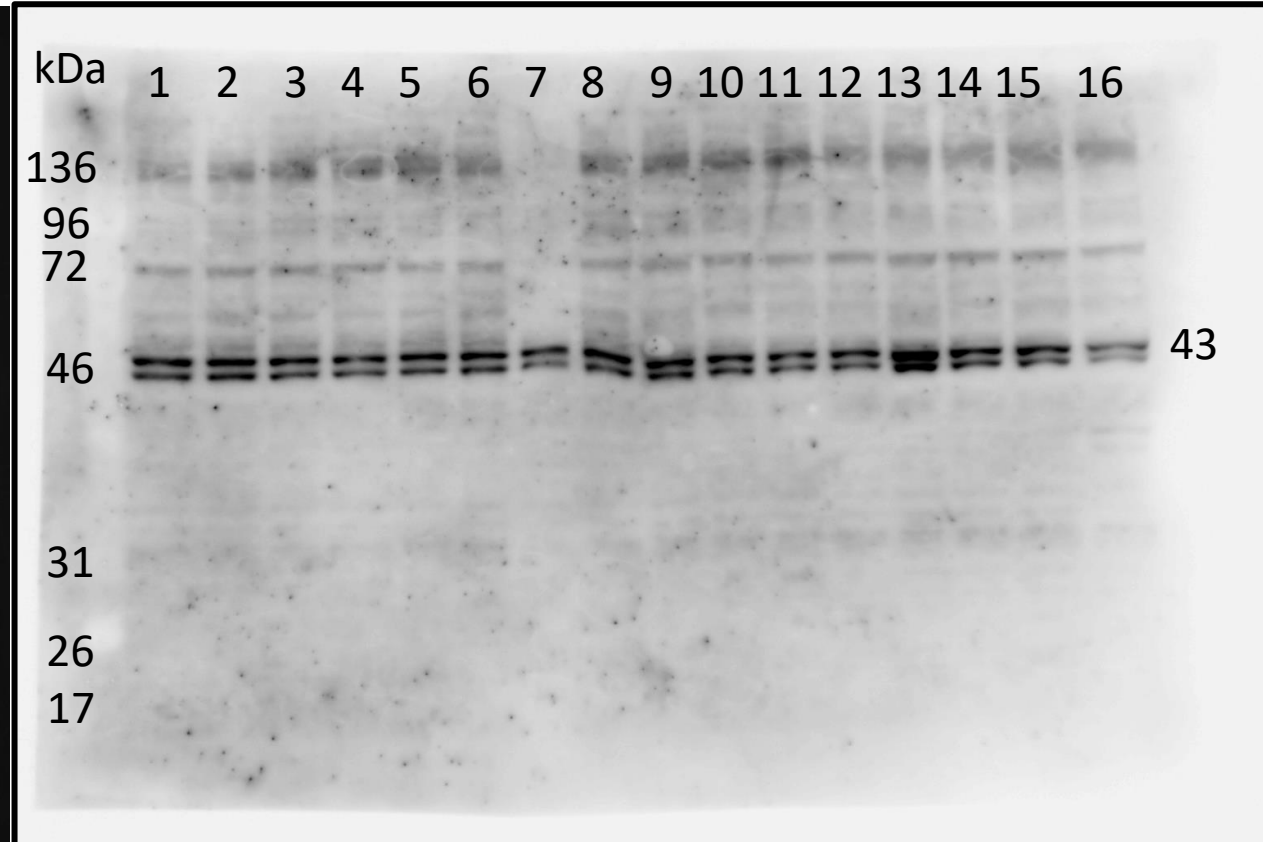

**43kDa:** 100:103:83:72:69:75:50:77:99:76:55:65:125:78:66:26

# HT1080 6 h 12 h treatment cleaved caspase 3

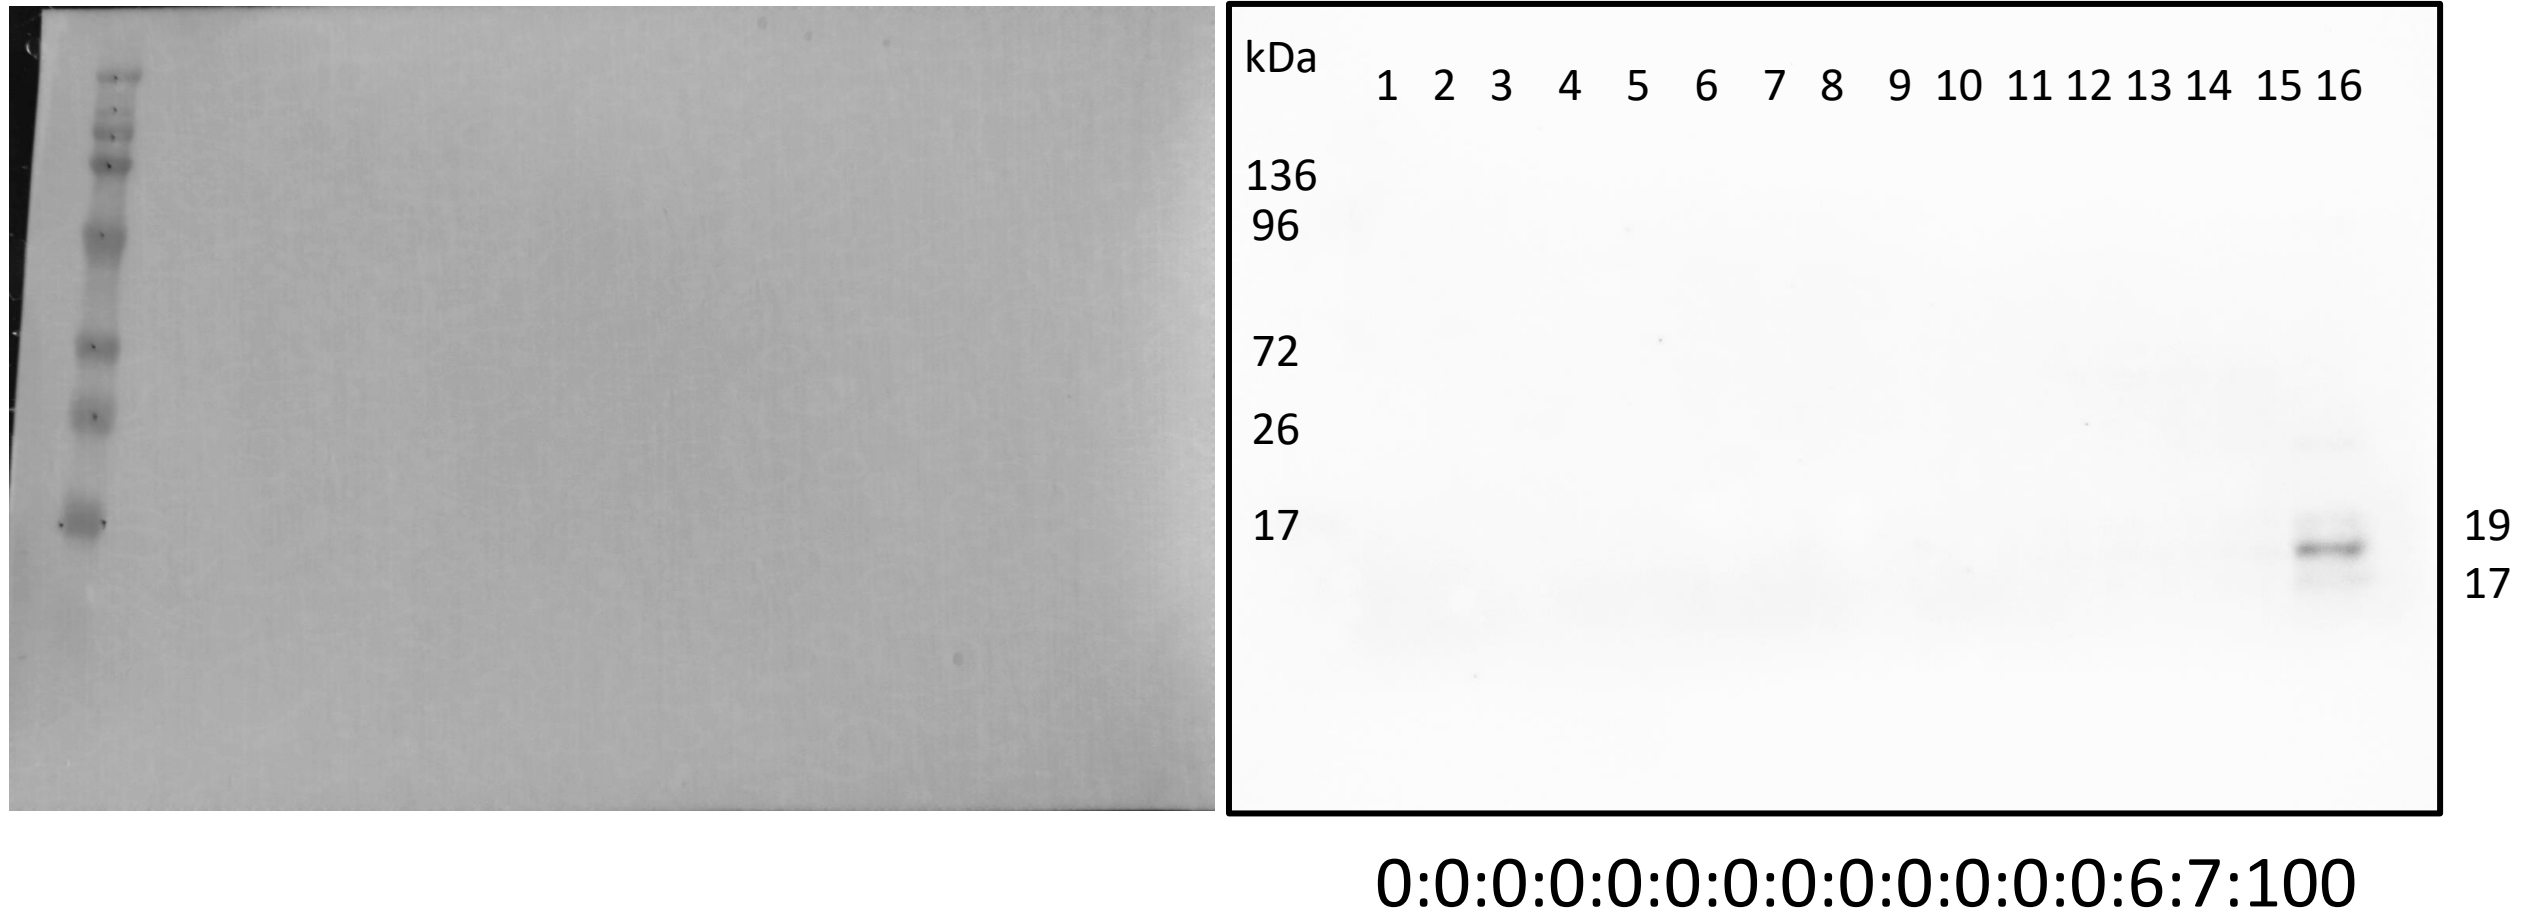

HT1080 6 h 12 h treatment cleaved PARP

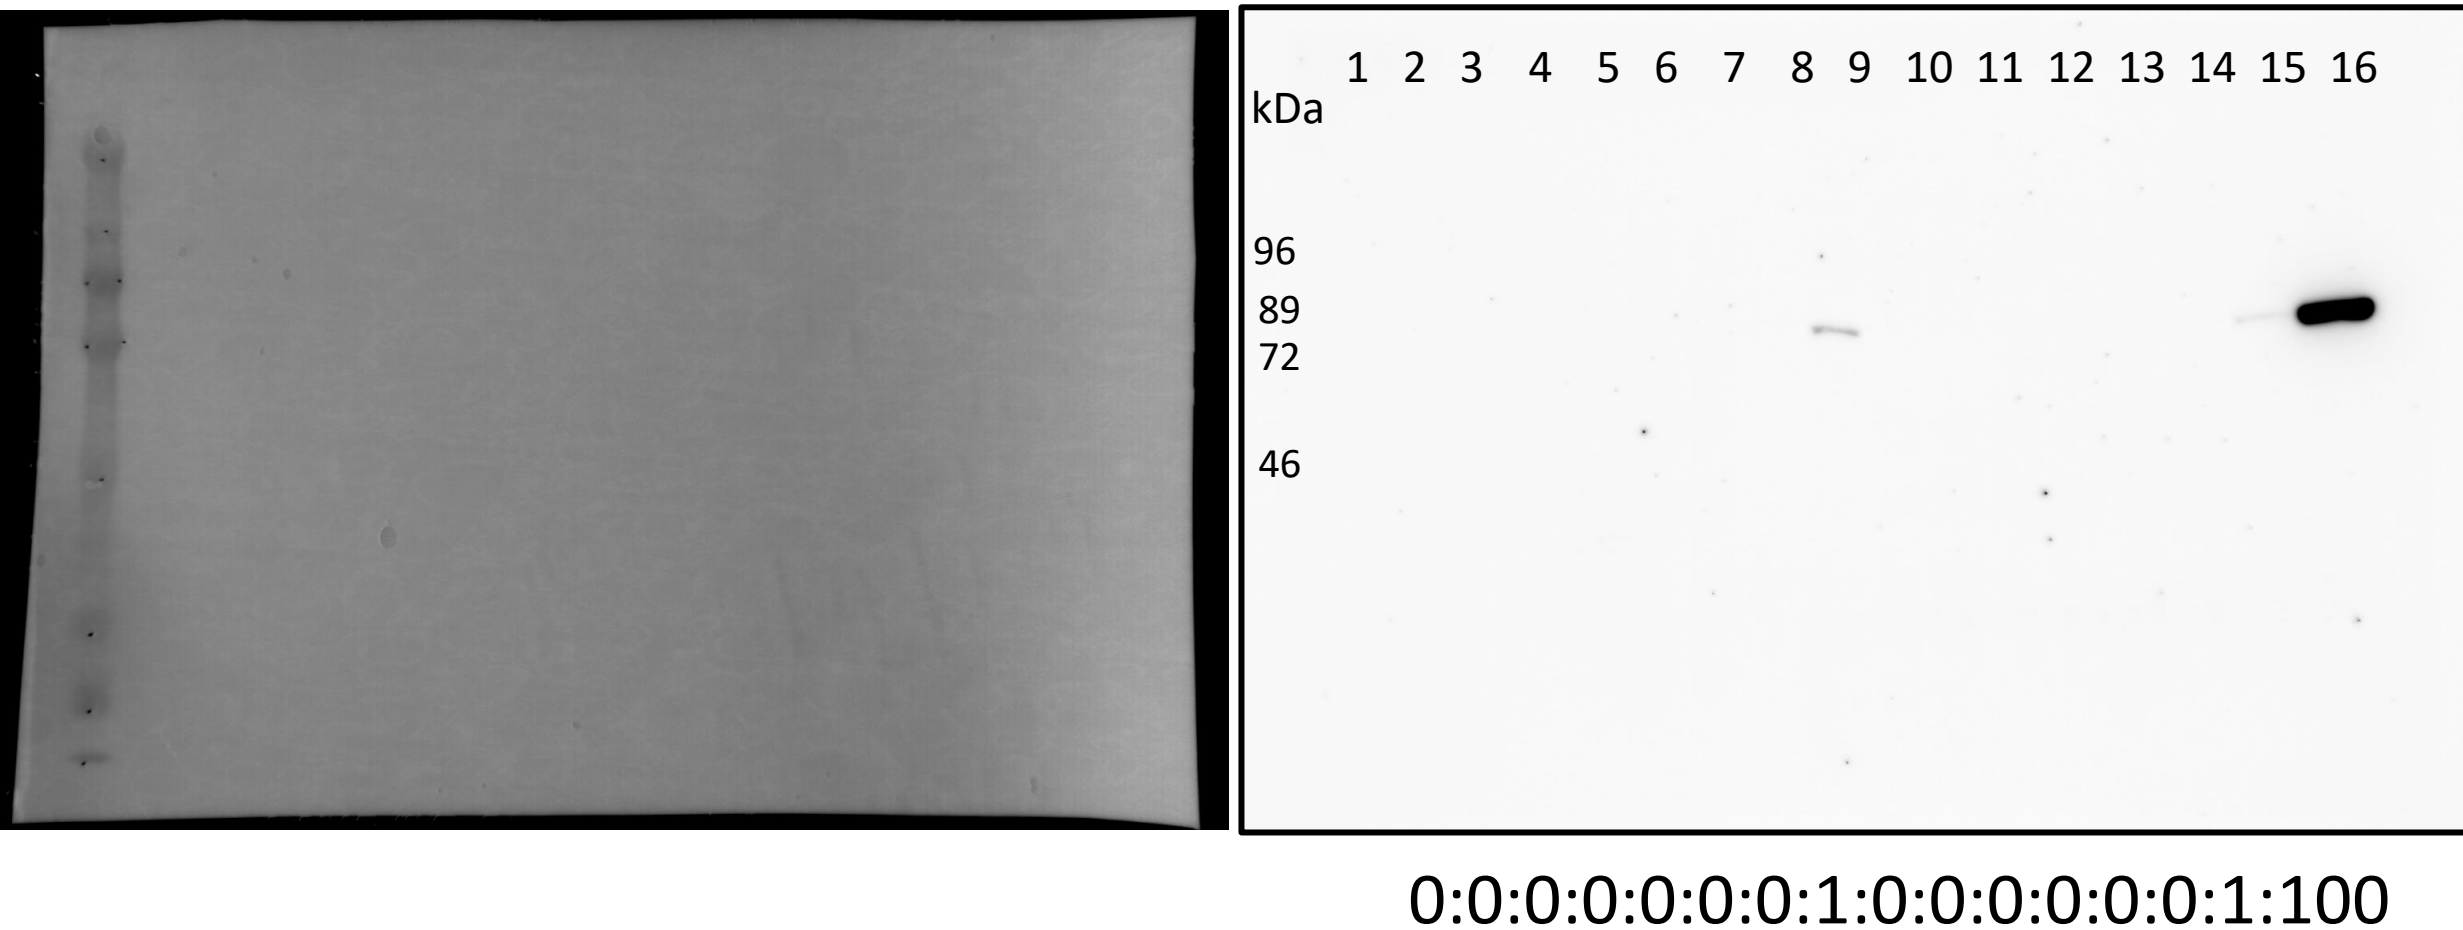



# HT1080 6 h 12 h treatment p-ERK

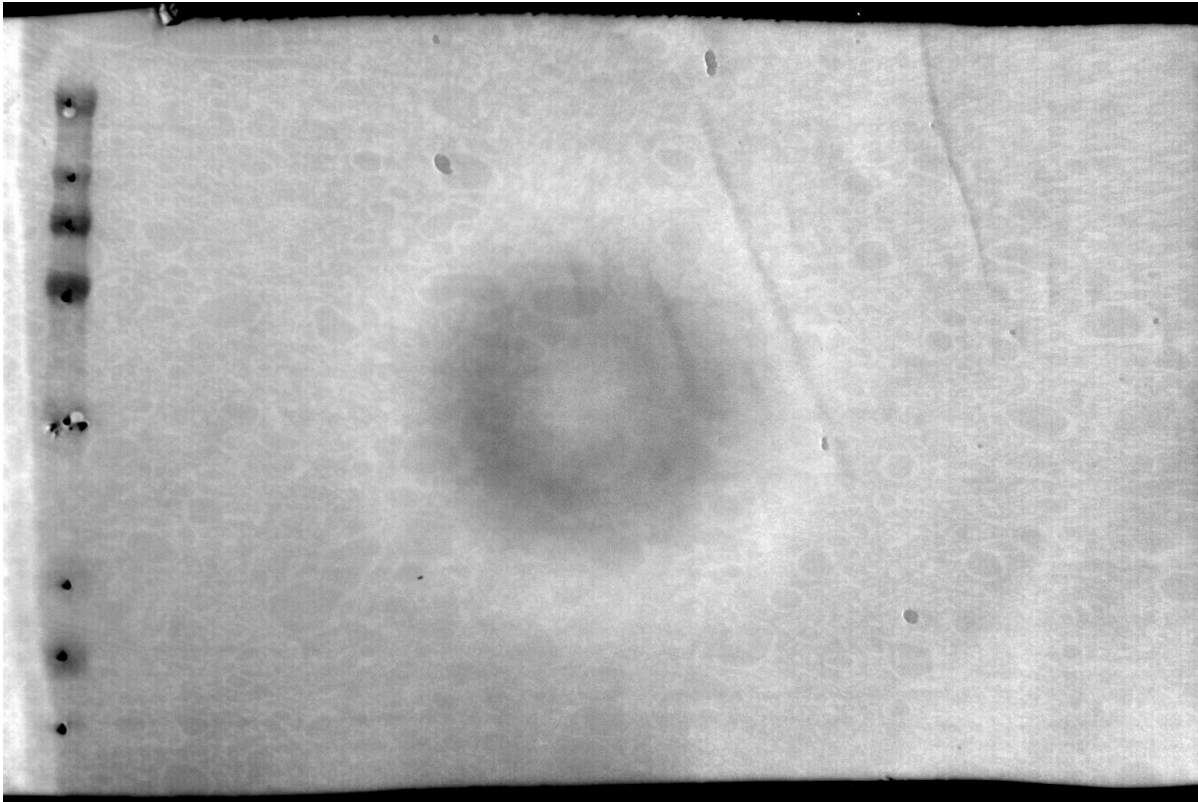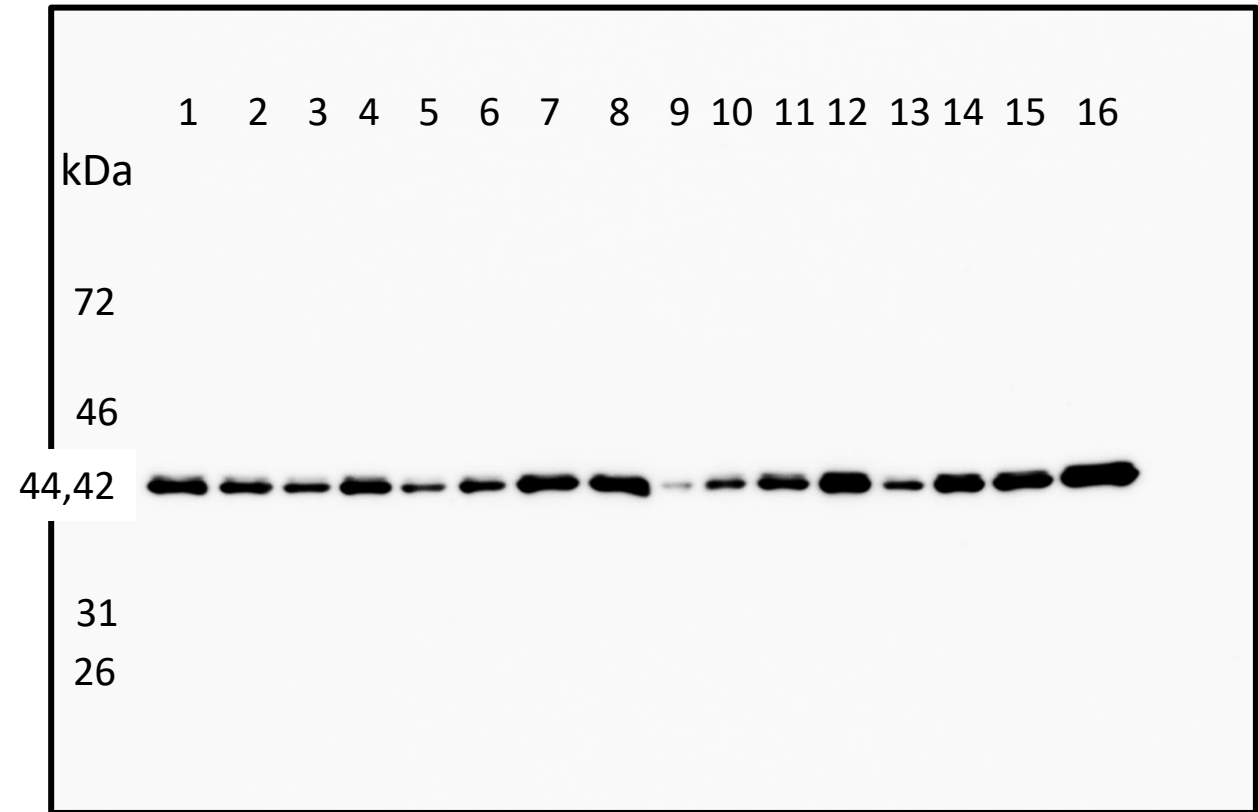

100:51:30:65:17:36:78:111:3:21:49:114:21:71:111:181

# HT1080 6 h 12 h treatment ERK

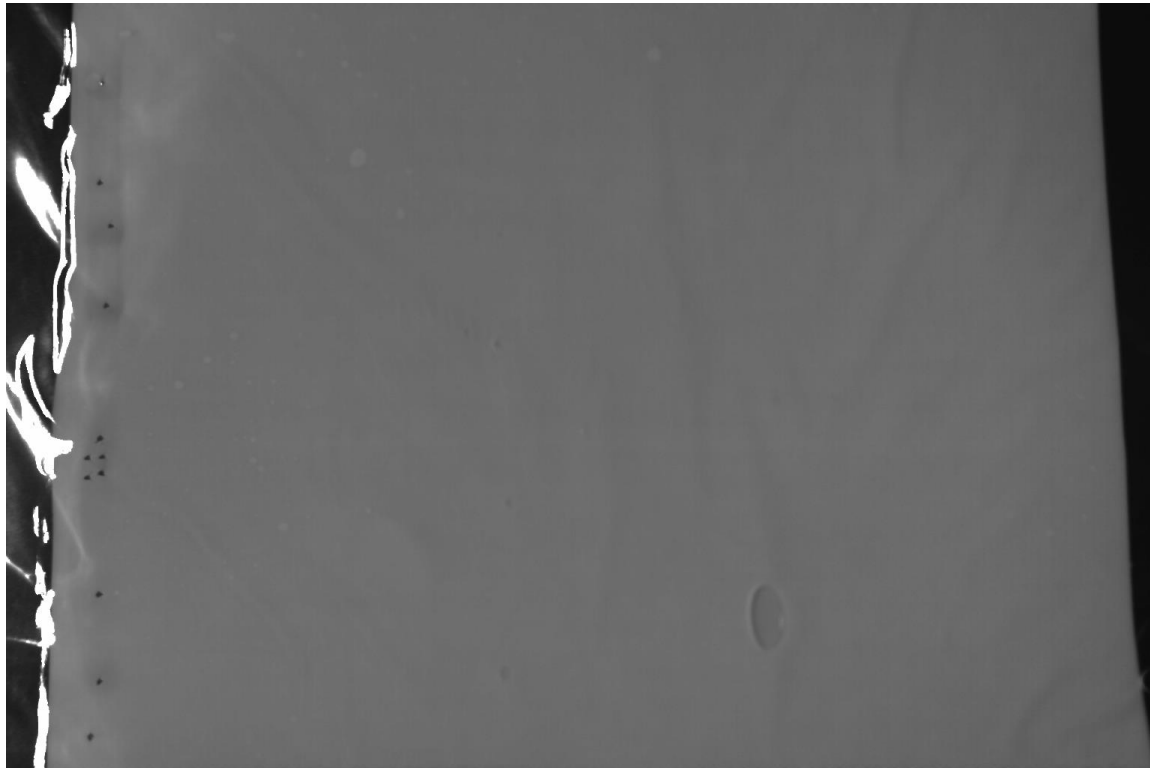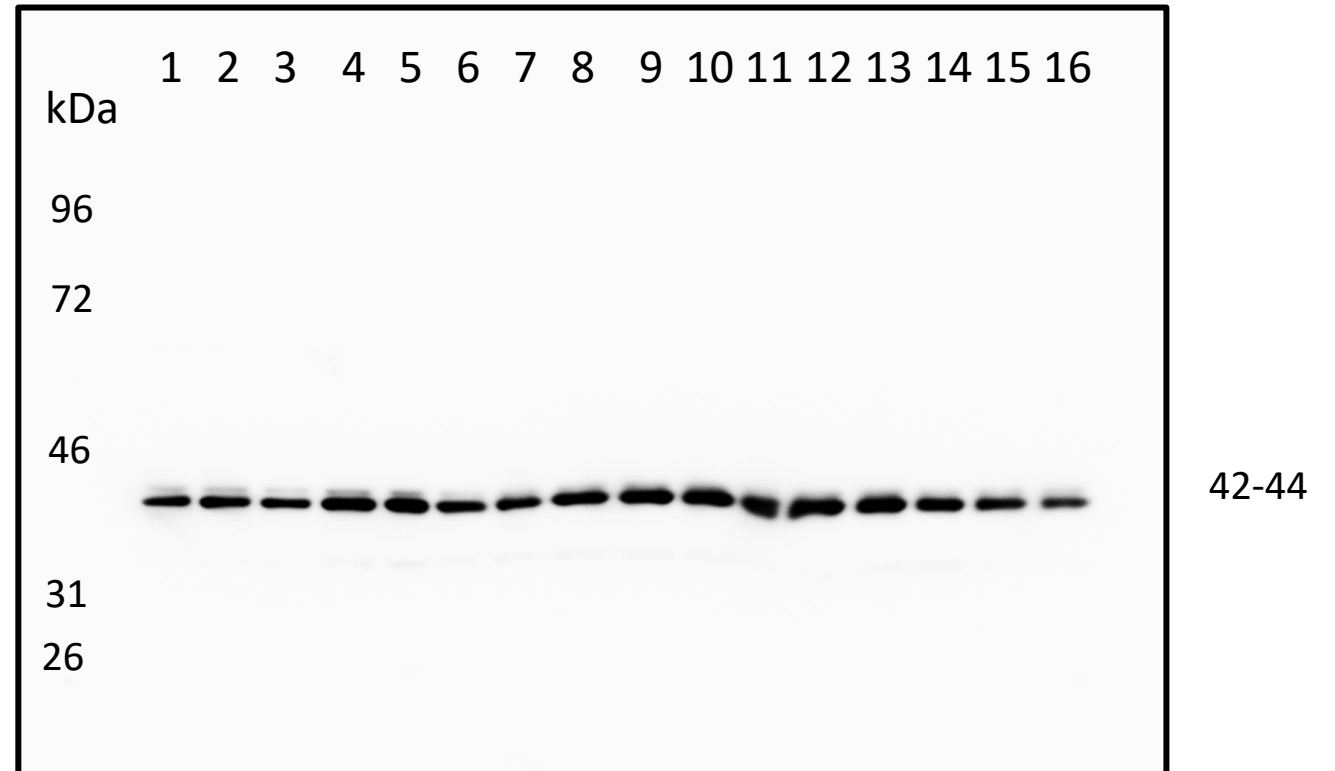

100:159:104:256:137:117:94:204:248:214:90:229:202:146:110:63

# HT1080 6 h 12 h treatment p-JNK

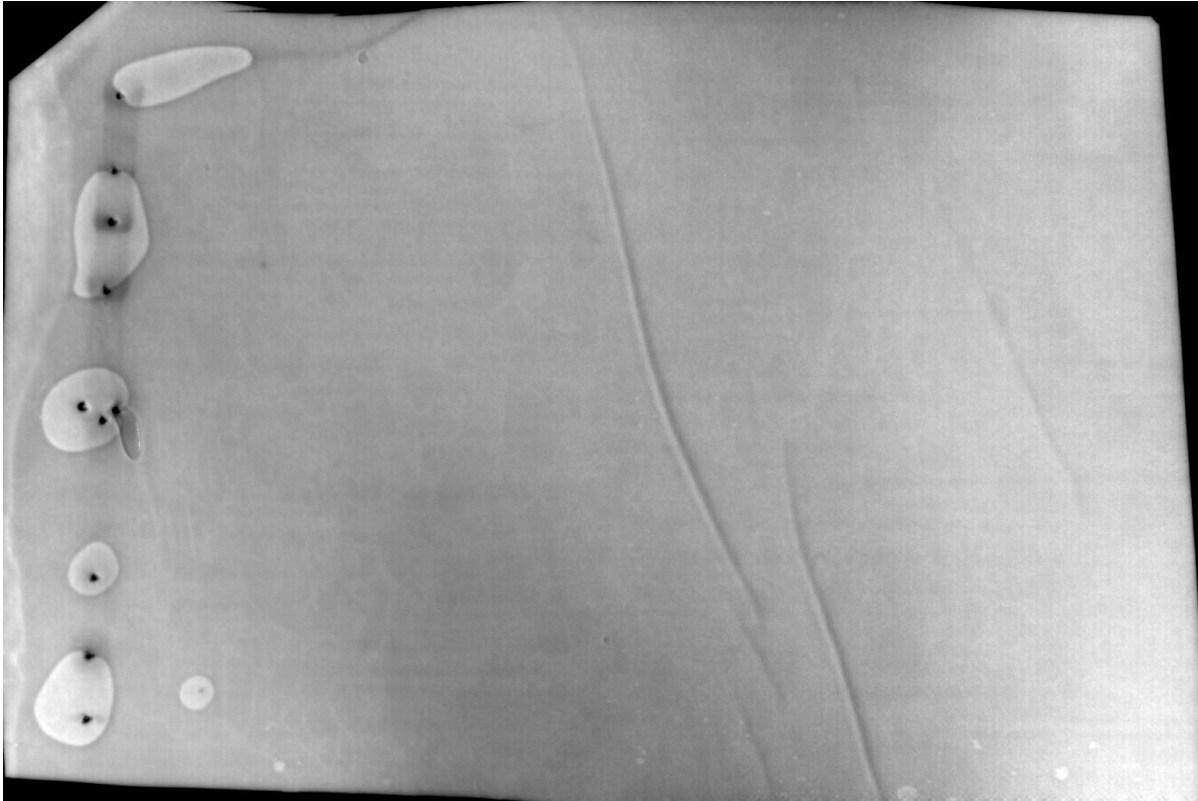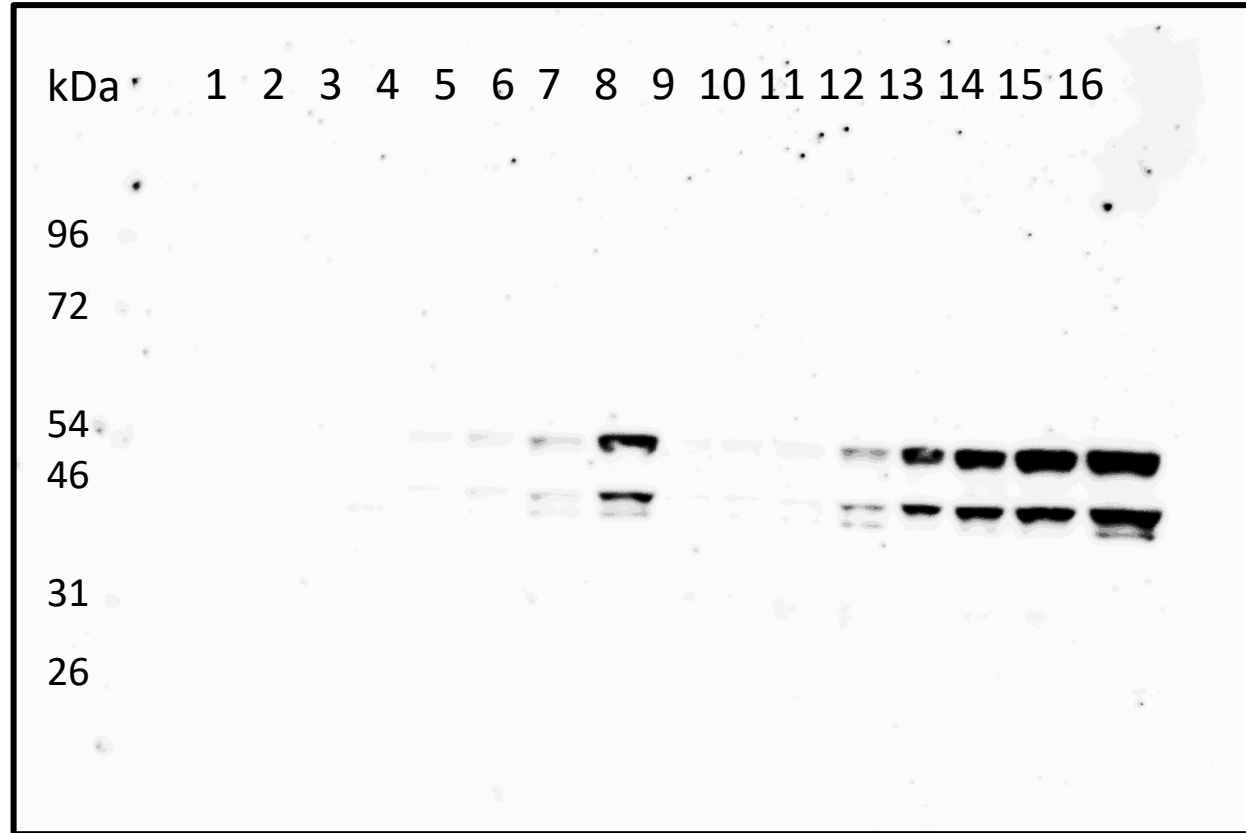

**54kDa:** 0:0:0:0:0:0:0:1:29:0:0:0:3:19:58:87:100

**46kDa:** 0:0:0:0:0:0:0:1:15:0:0:0:3:12:28:49:70

# HT1080 6 h 12 h treatment JNK

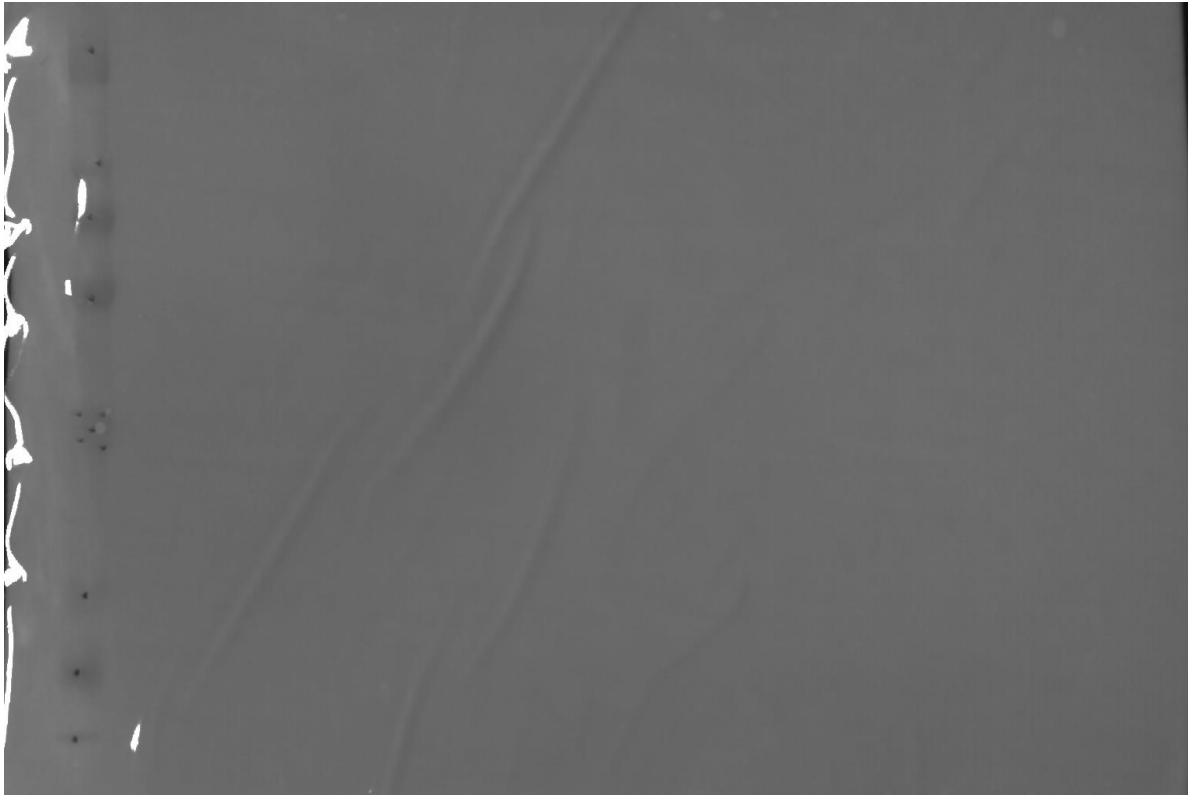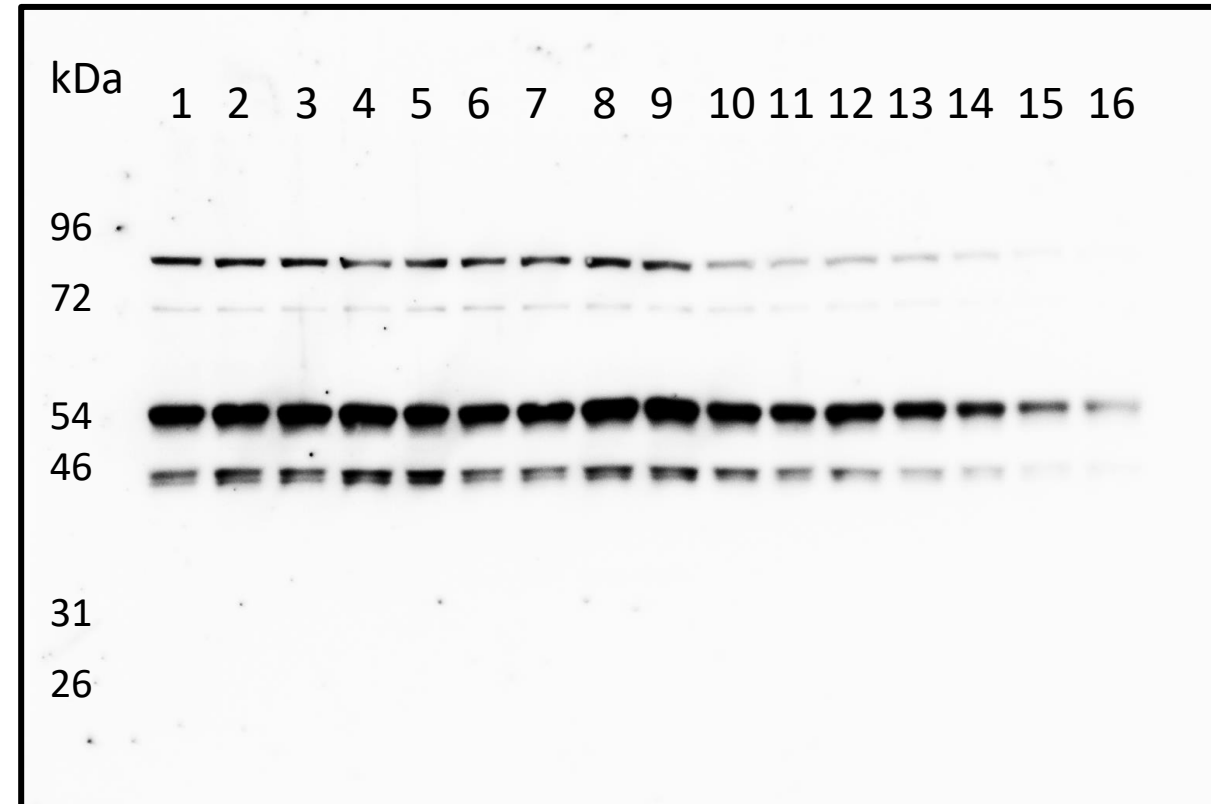

**54kDa:**100:111:83:114:70:63:90:108:119:93:51:80:49:29:12:4

**46kDa:**13:22:17:28:23:11:10:18:17:12:6:6:2:1:0:0

# HT1080 6 h 12 h treatment p-p38

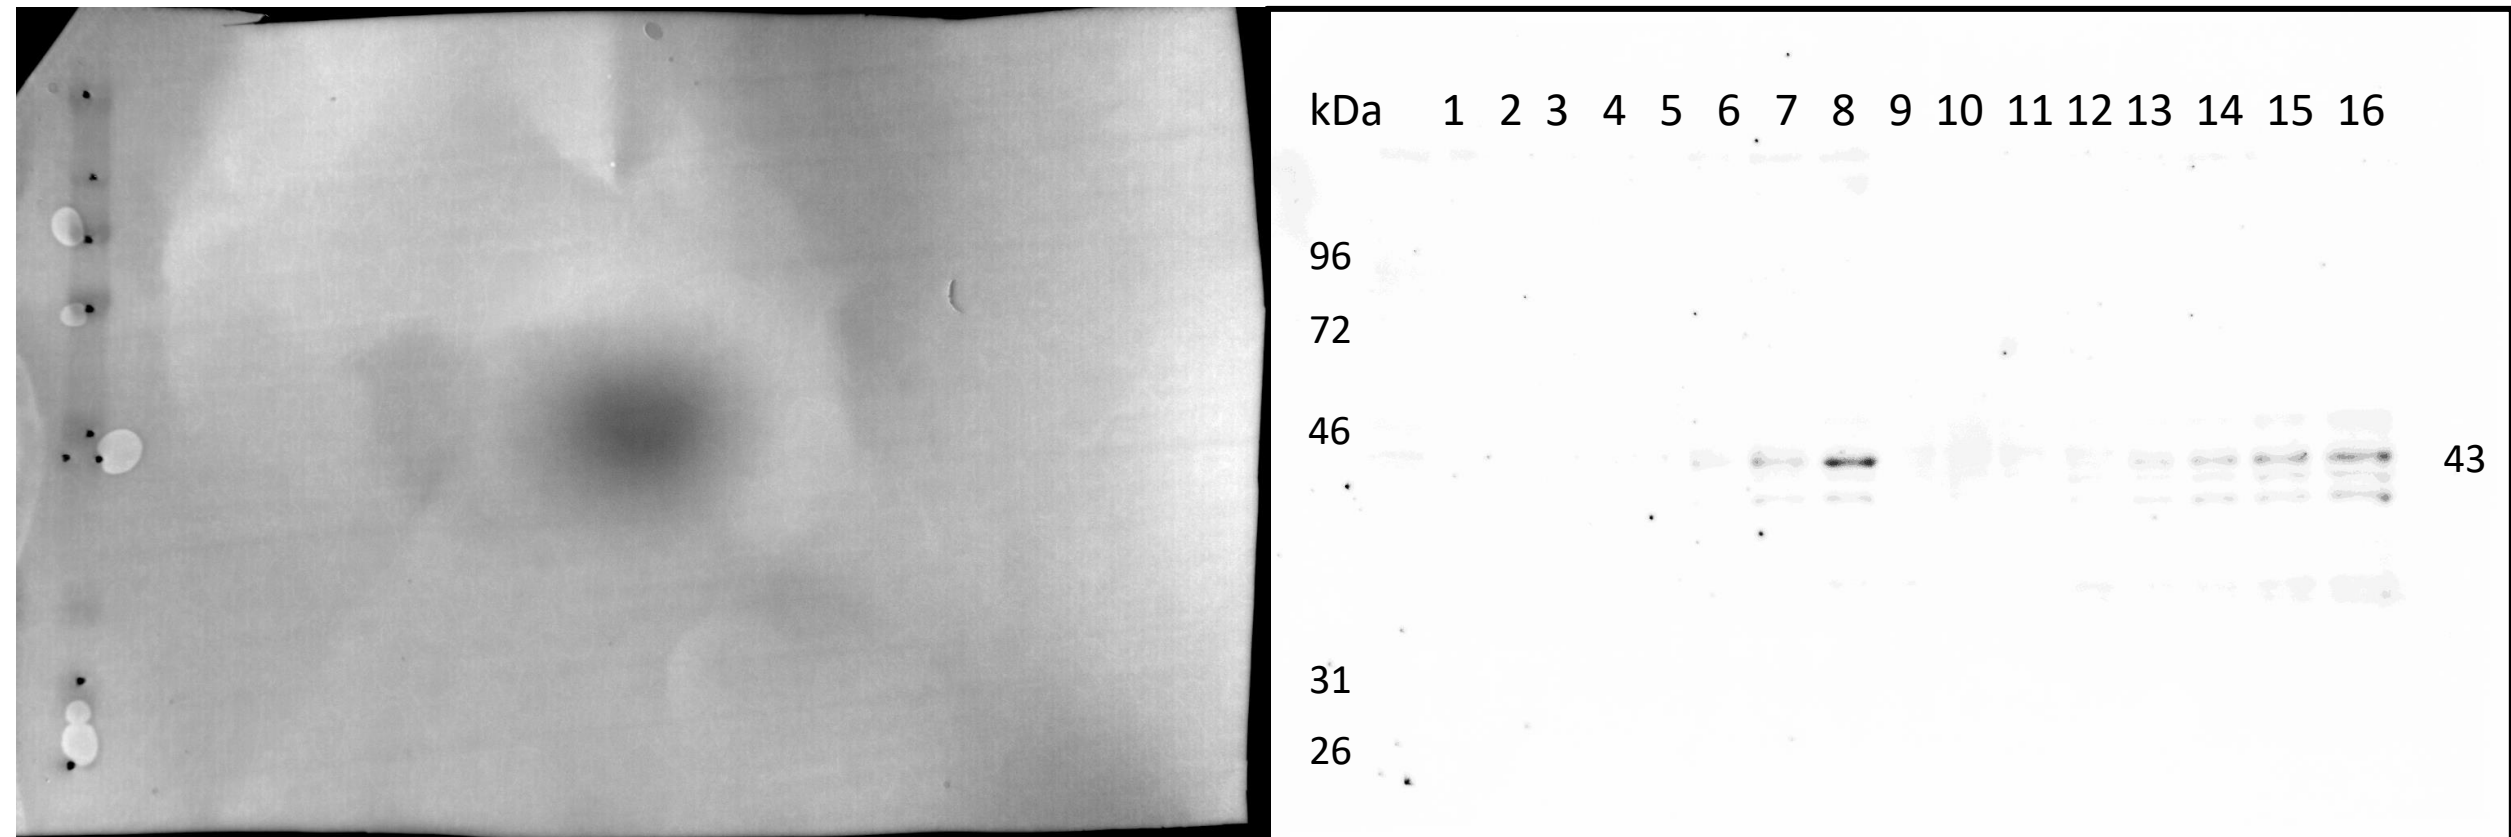

**43kDa:**0:2:0:0:0:15:50:171:13:39:12:8:17:26:51:100

# HT1080 6 h 12 h treatment p38

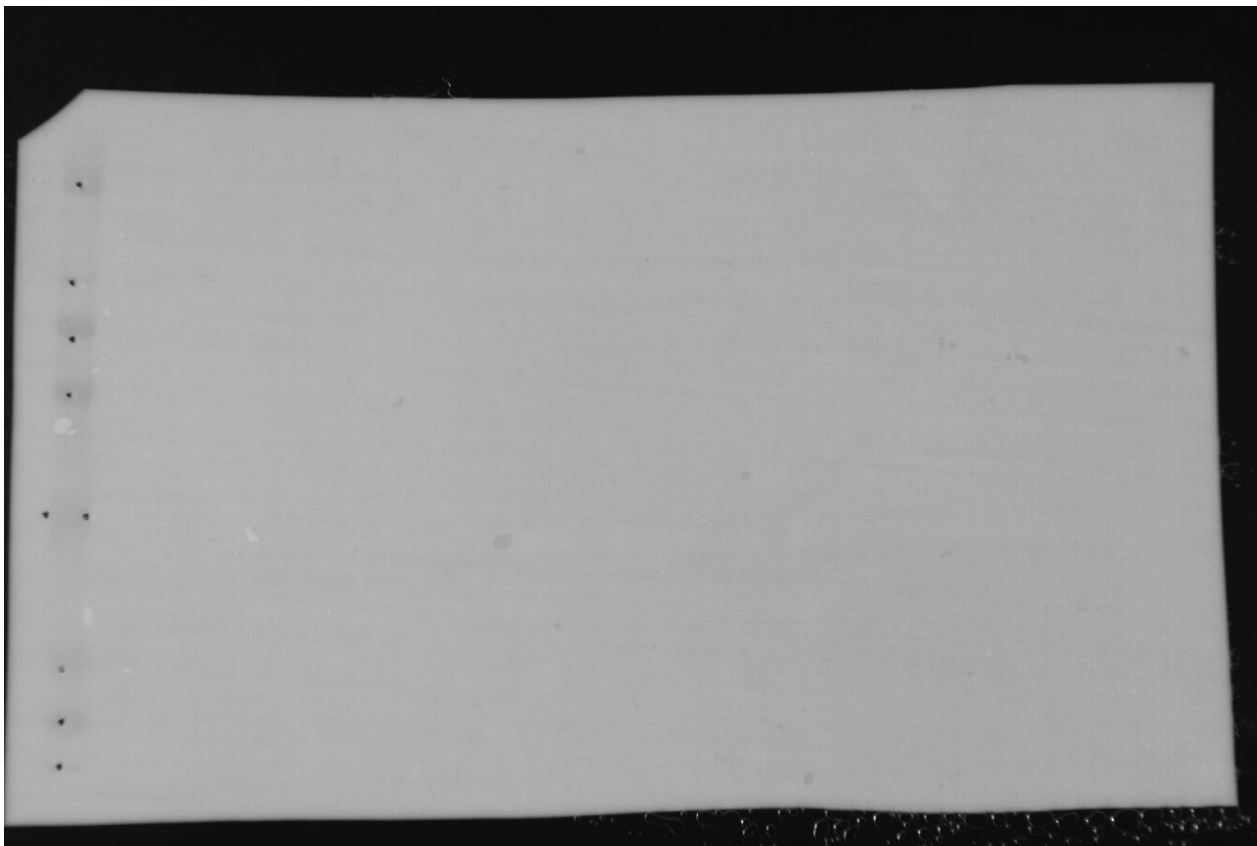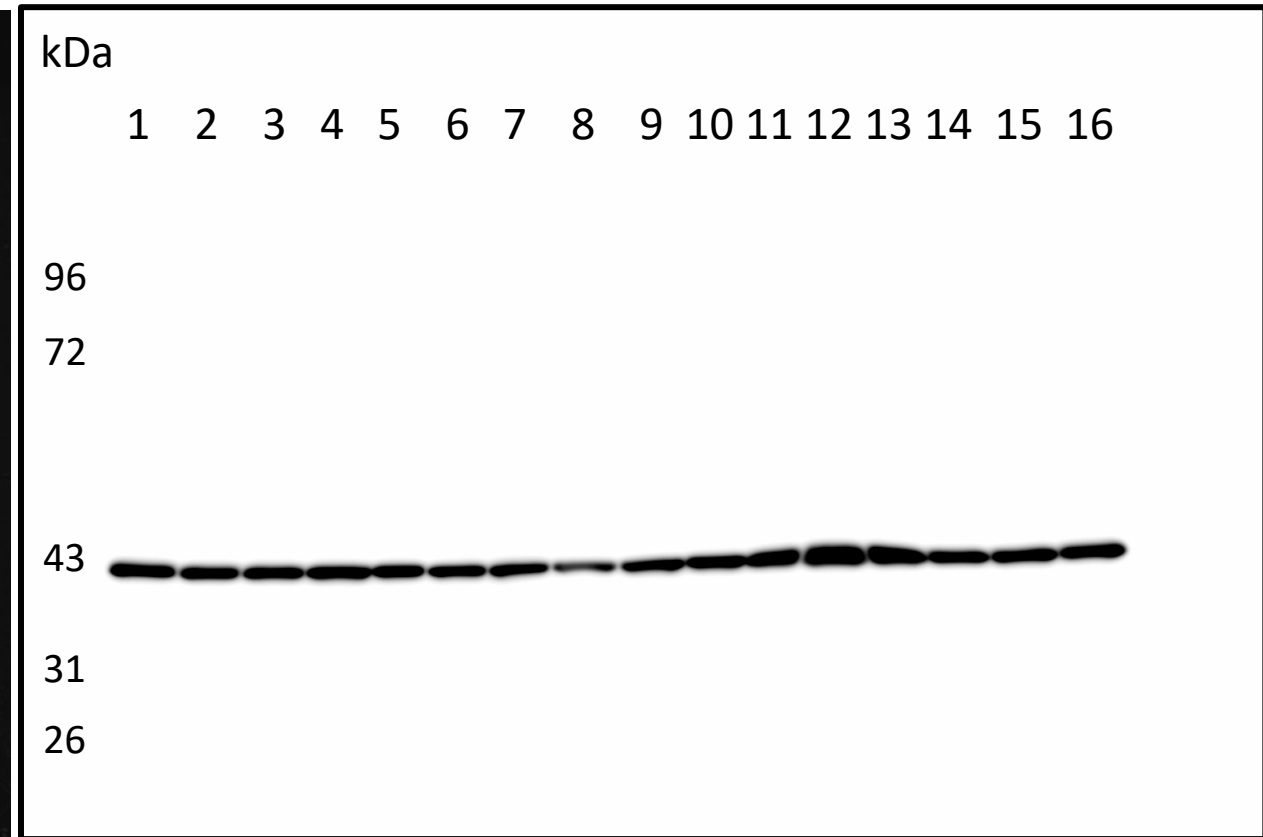

**43kDa:**100:77:71:101:80:61:66:24:75:88:90:111:98:89:92:93

# HT1080 6 h 12 h treatment MYC

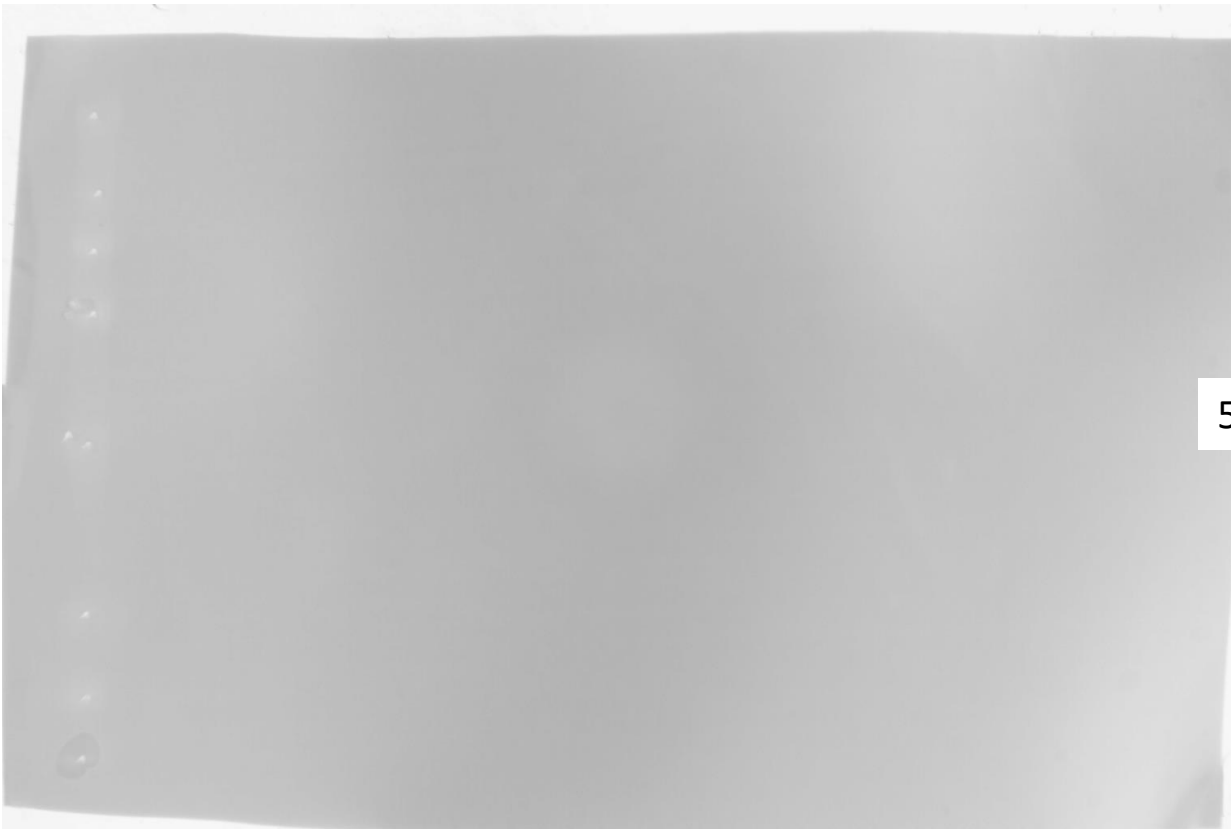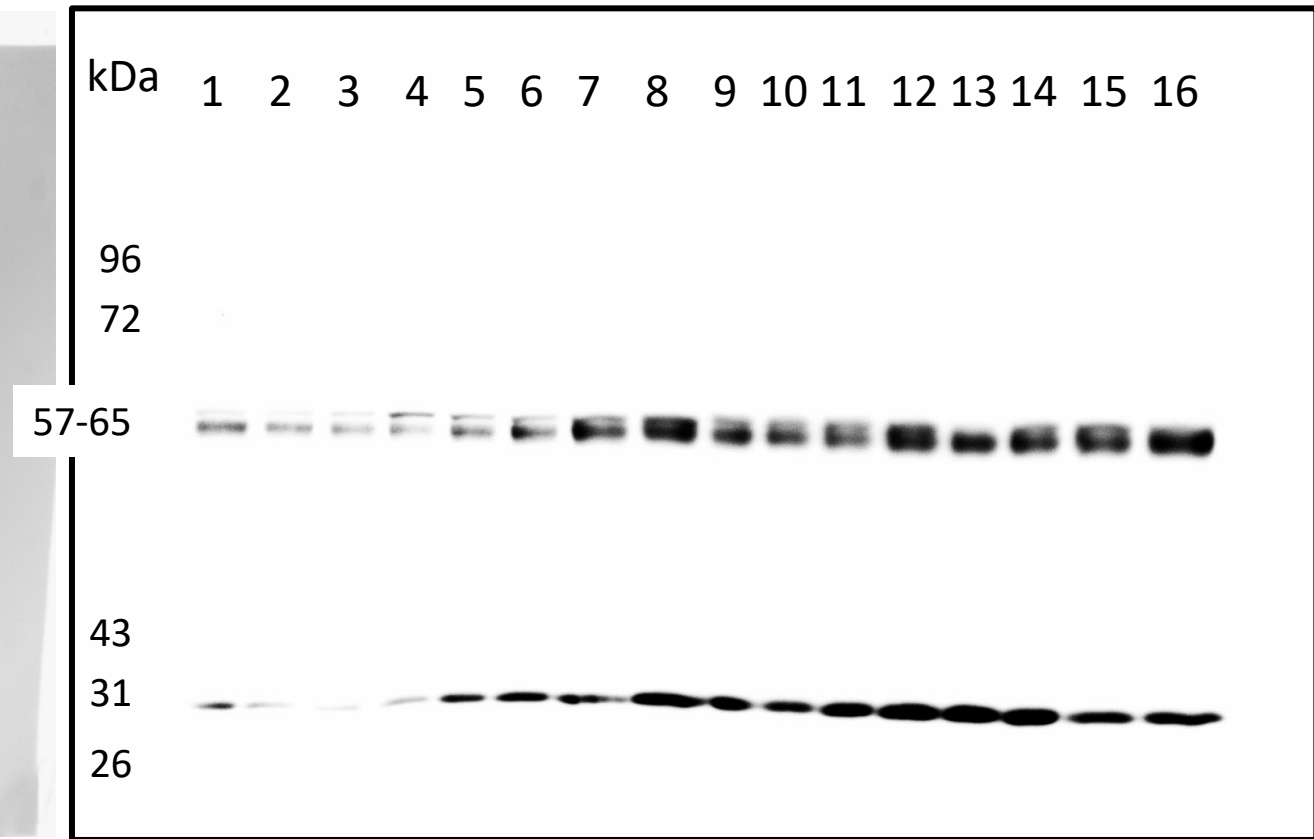

**57-65kDa:**100:43:31:56:93:166:412:696:327:278:295:700:458:524:601:928

# HT1080 6 h 12 h treatment Survivin

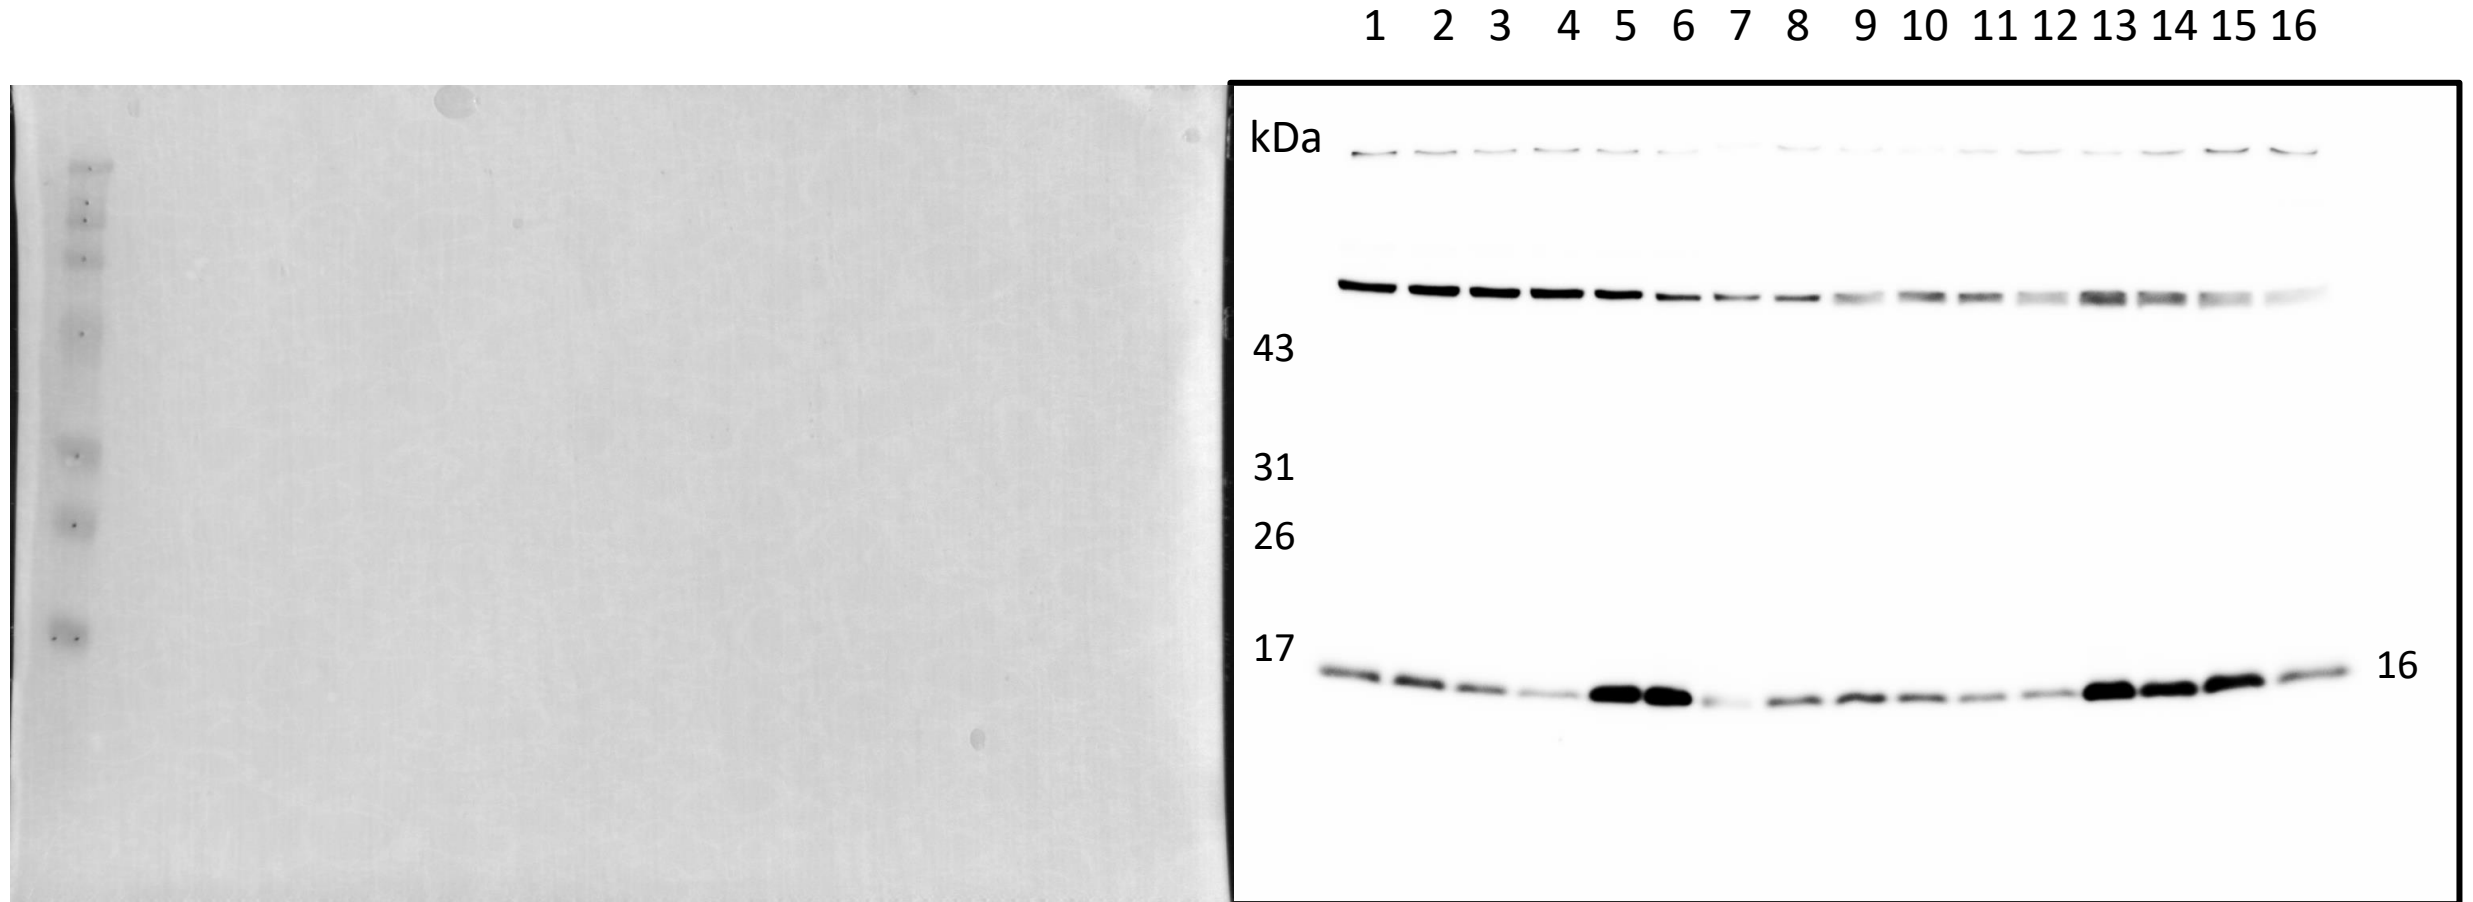

**16kDa:**100:143:82:28:610:652:21:85:124:87:44:47:631:571:492:84



# HT1080 6 h 12 h treatment MCL-1

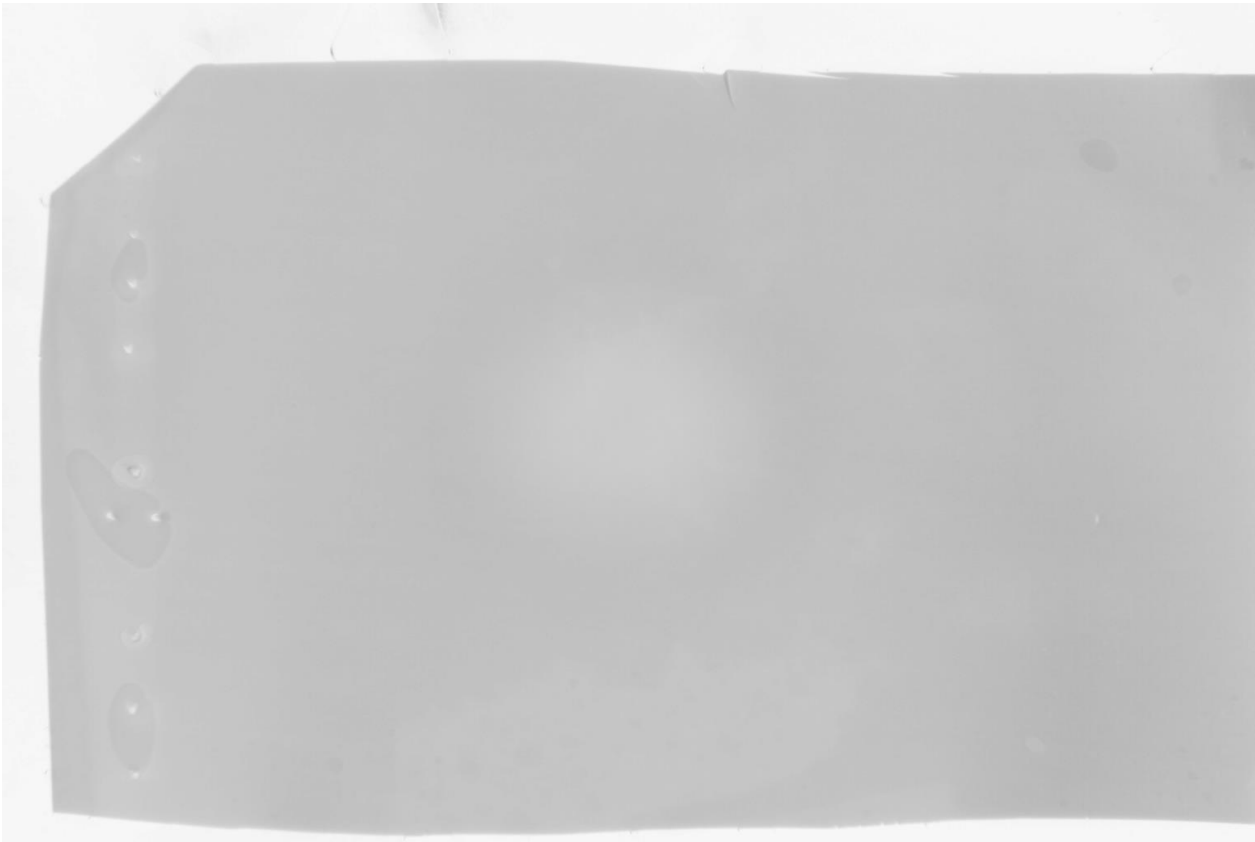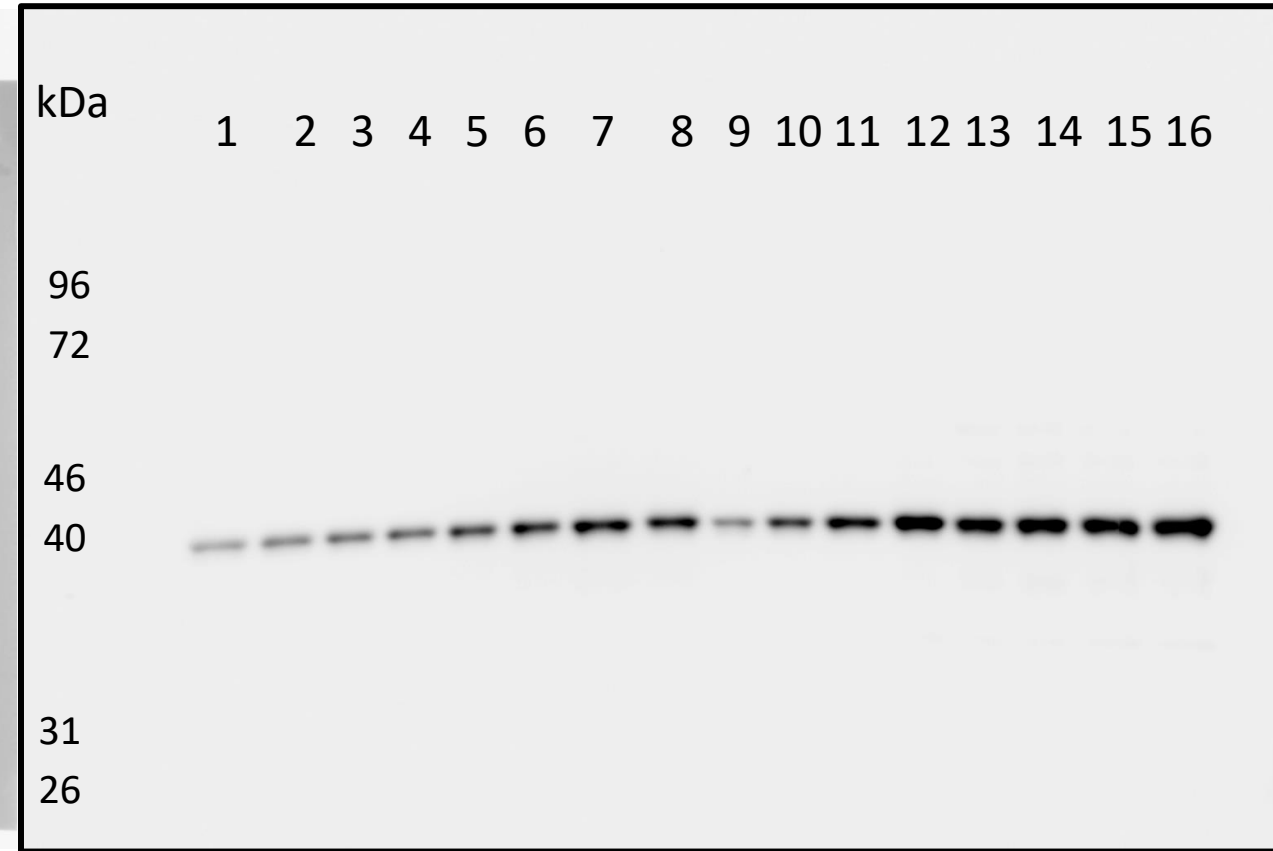

**40kDa:**5:8:9:11:16:21:33:27:7:17:39:62:51:57:70:100

# HT1080 6 h 12 h treatment p-AKT

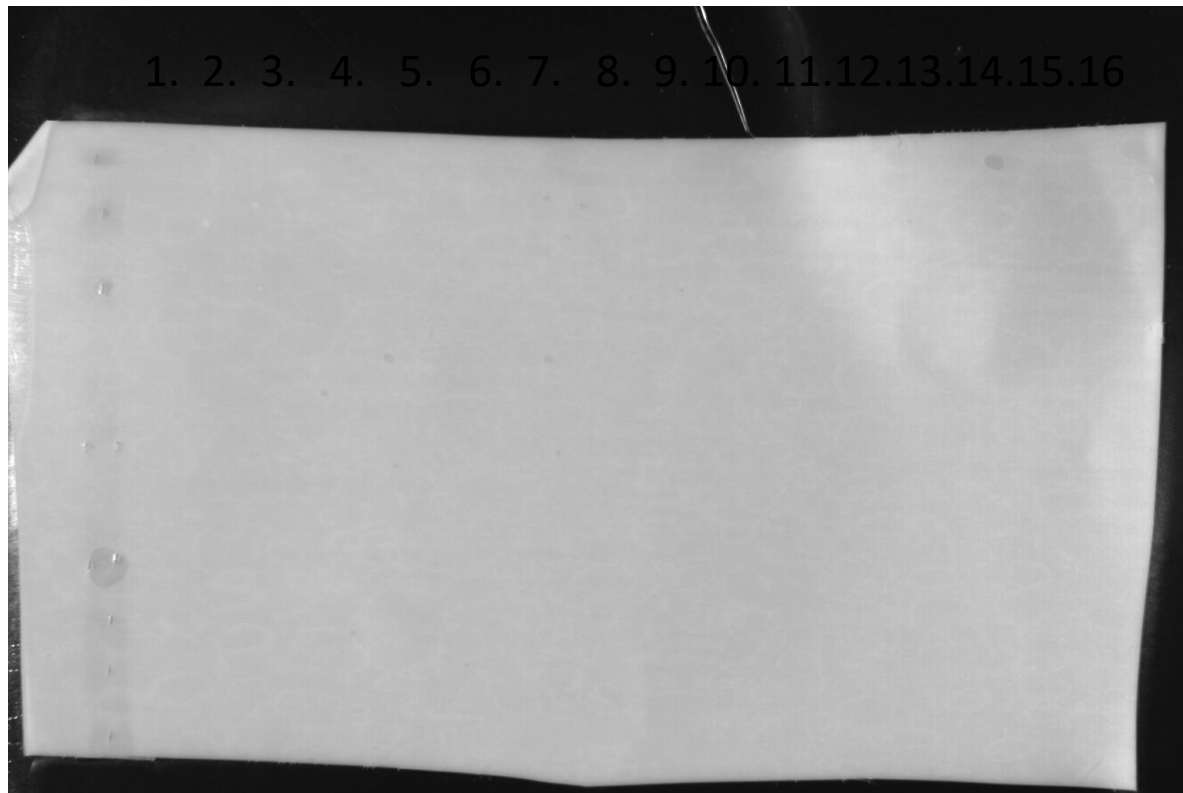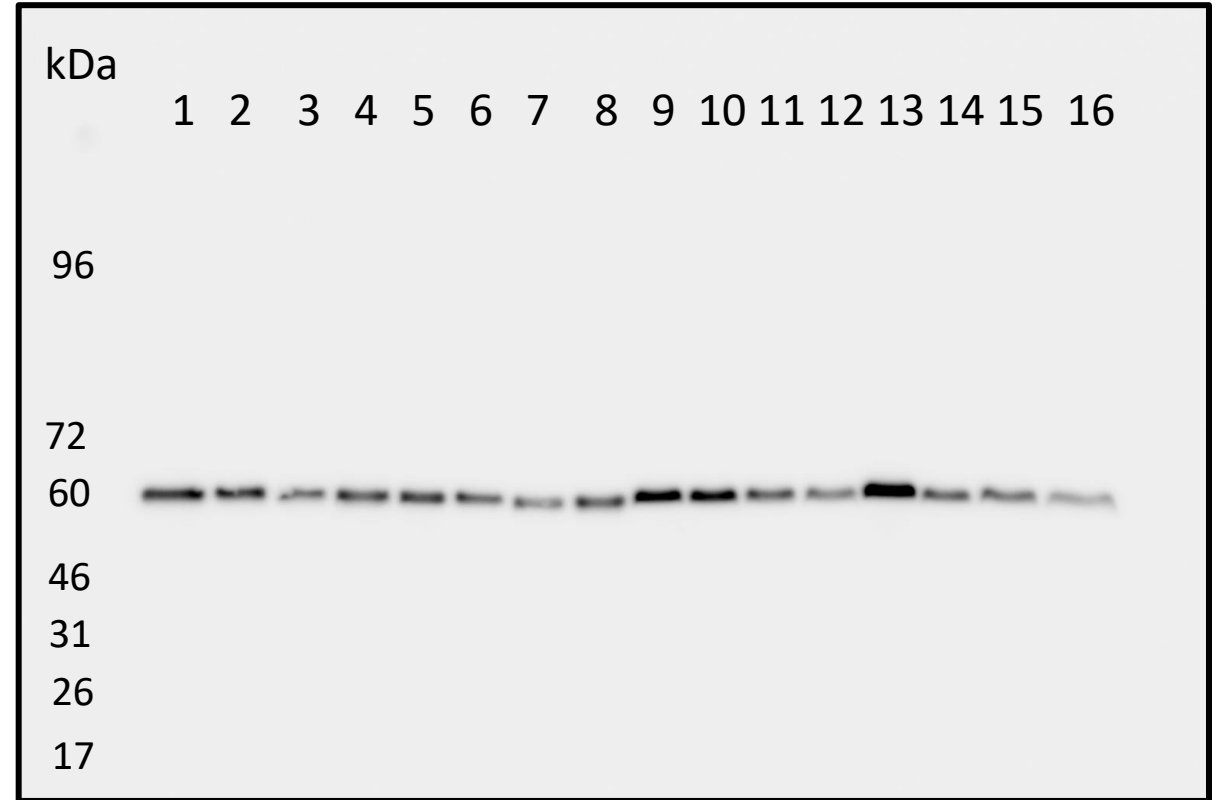

**60kDa:**100:78:38:64:64:49:35:60:140:120:58:40:215:54:46:25

# HT1080 6 h 12 h treatment AKT

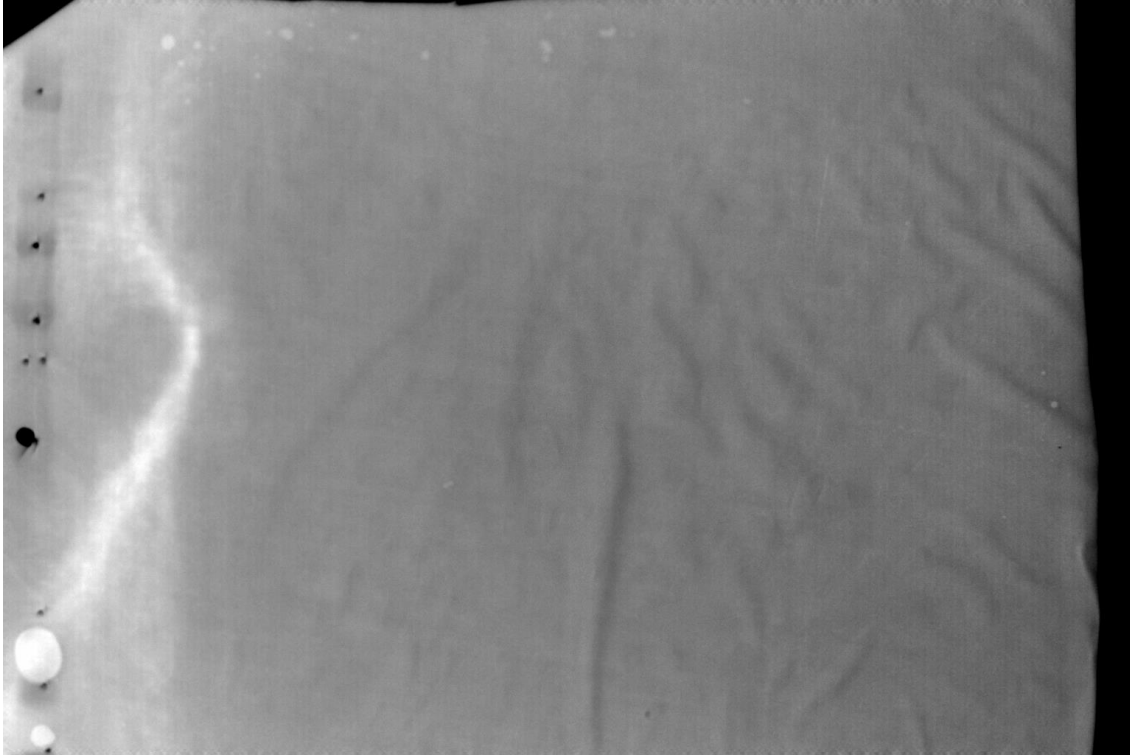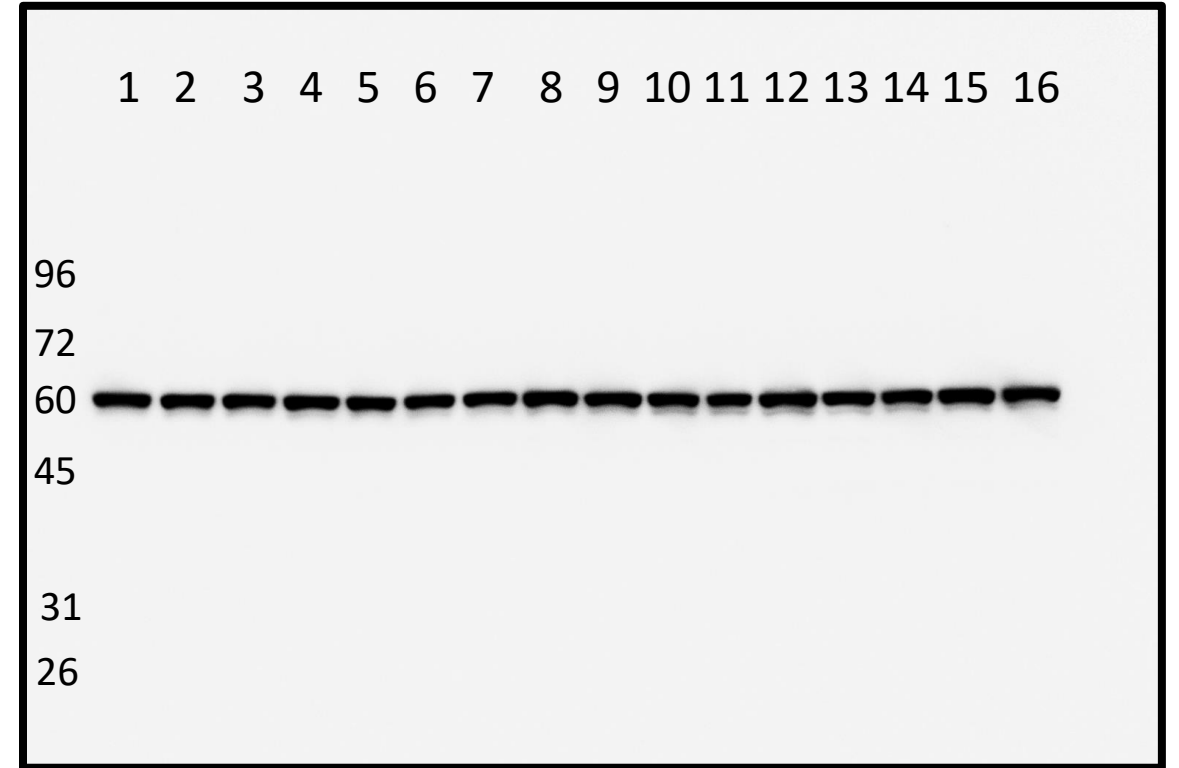

60kDa:100:91:70:82:60:58:80:80:100:68:52:106:94:81:114:82

# HT1080 treatment 24h

Treatment time 24 h

- 1. Everolimus 0  $\mu\text{M}$
- 2. Everolimus 5  $\mu\text{M}$
- 3. Everolimus 10  $\mu\text{M}$
- 4. Everolimus 20  $\mu\text{M}$
- 5. Everolimus 0  $\mu\text{M}$       Bortezomib 5nM
- 6. Everolimus 5  $\mu\text{M}$       Bortezomib 5nM
- 7. Everolimus 10  $\mu\text{M}$       Bortezomib 5nM
- 8. Everolimus 20  $\mu\text{M}$       Bortezomib 5nM

# HT1080 24 h treatment $\beta$ actin

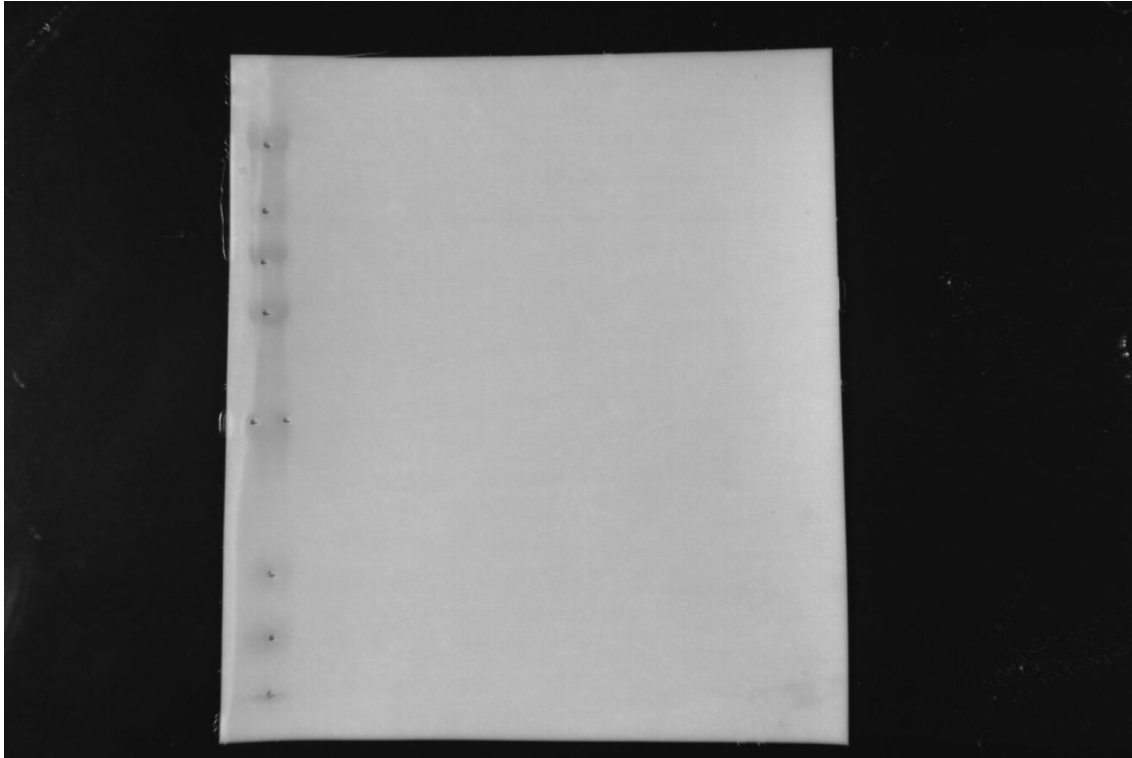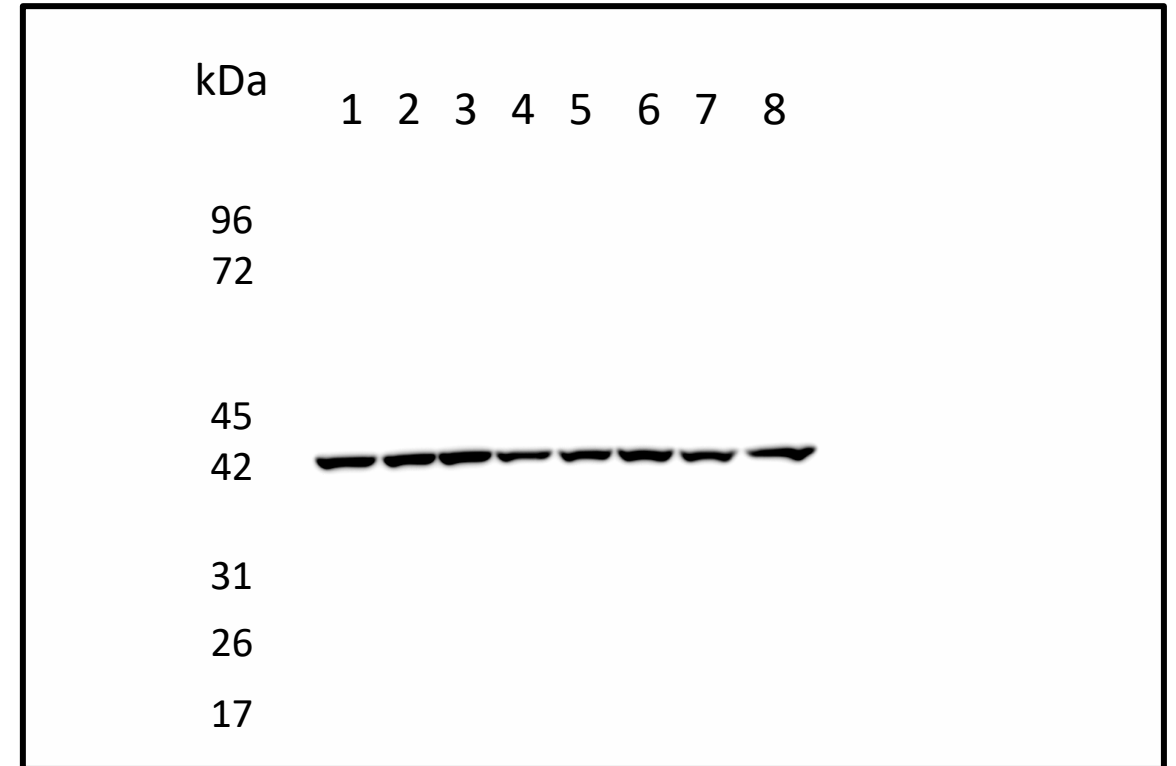

**42kDa:**100:74:81:49:52:68:53:67

# HT1080 24 h treatment BIK

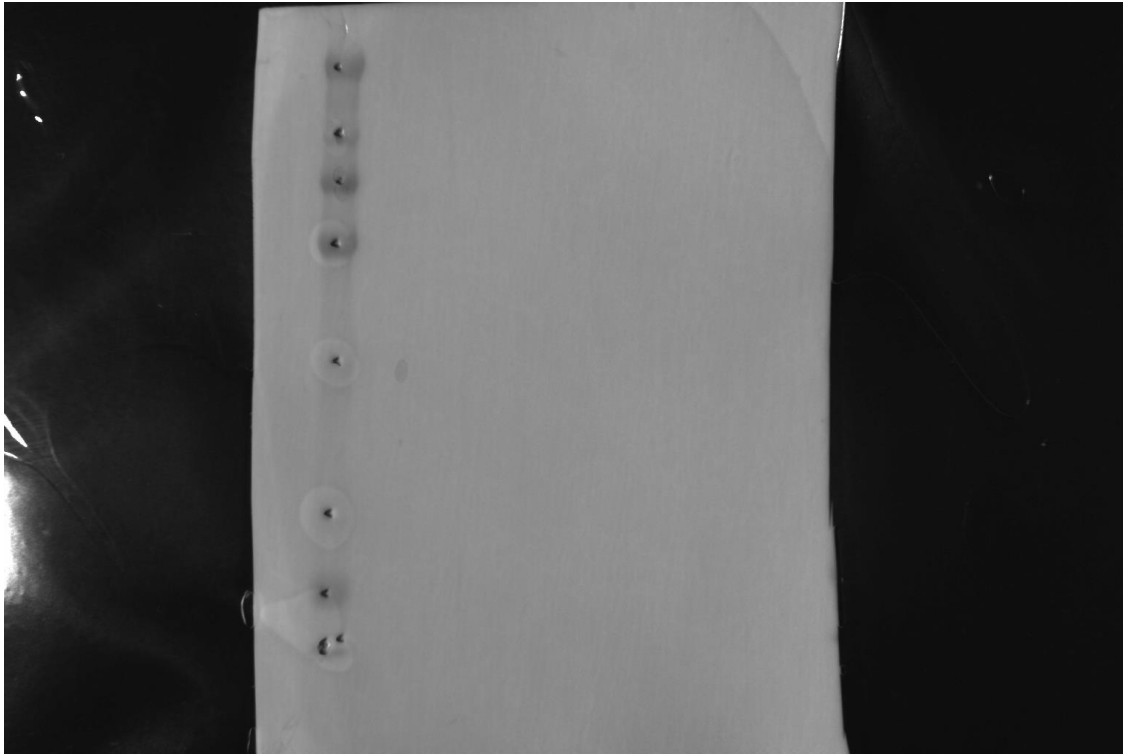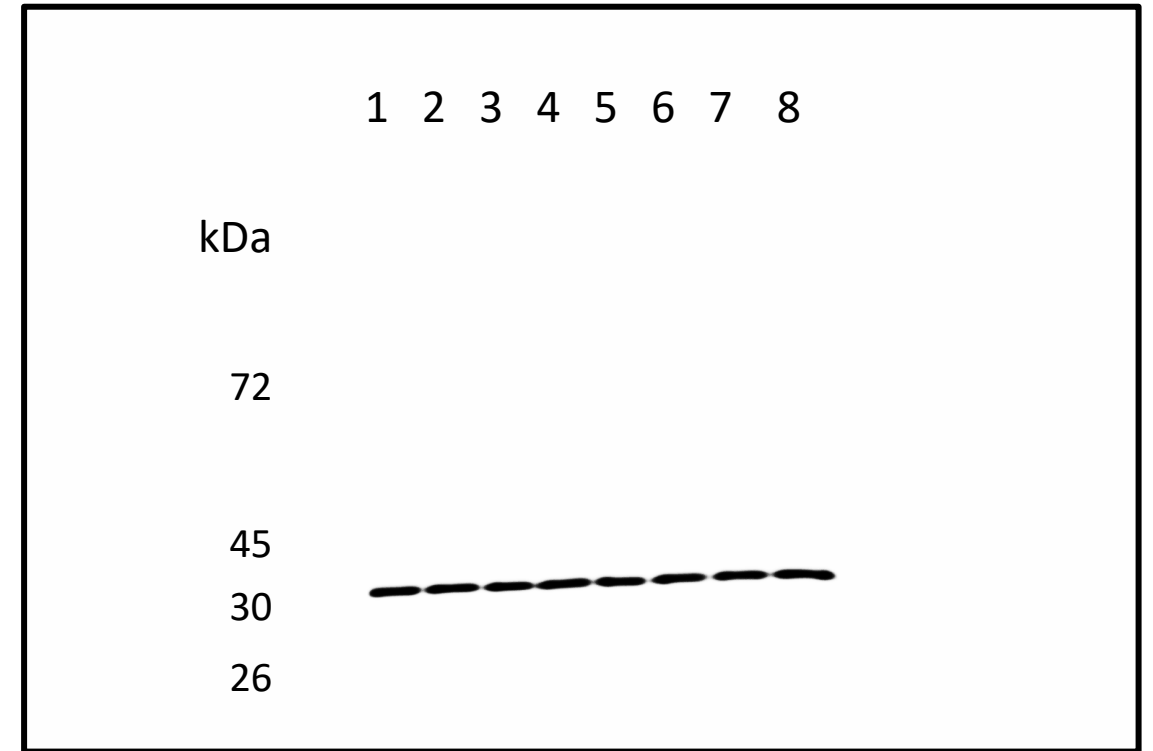

**30kDa:100:121:94:116:110:108:119:183**

# HT1080 24 h treatment cleaved caspase 9

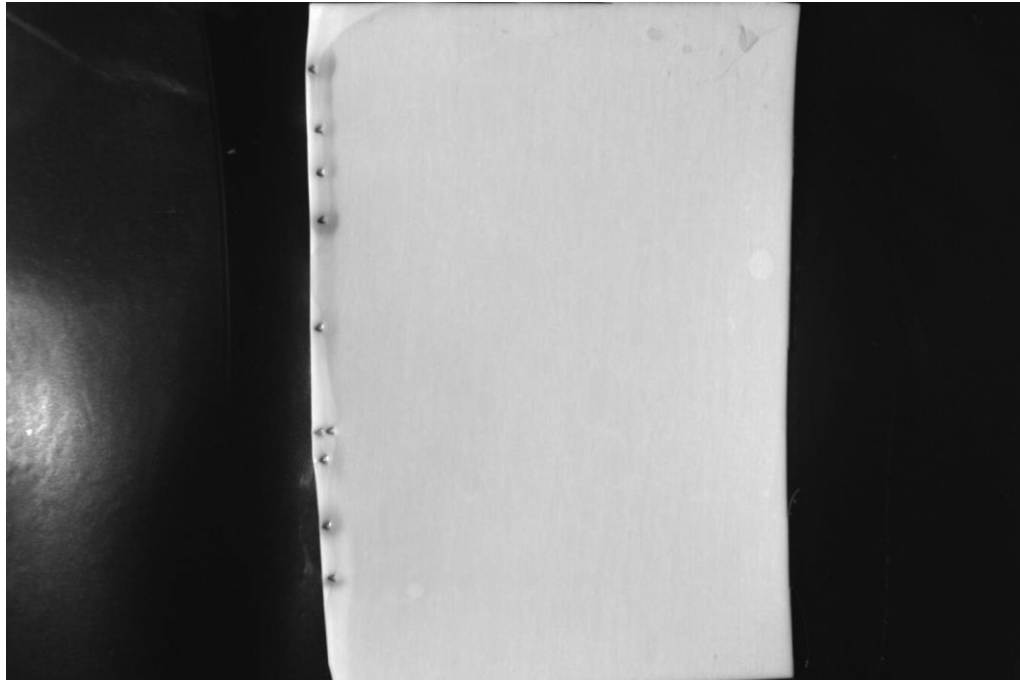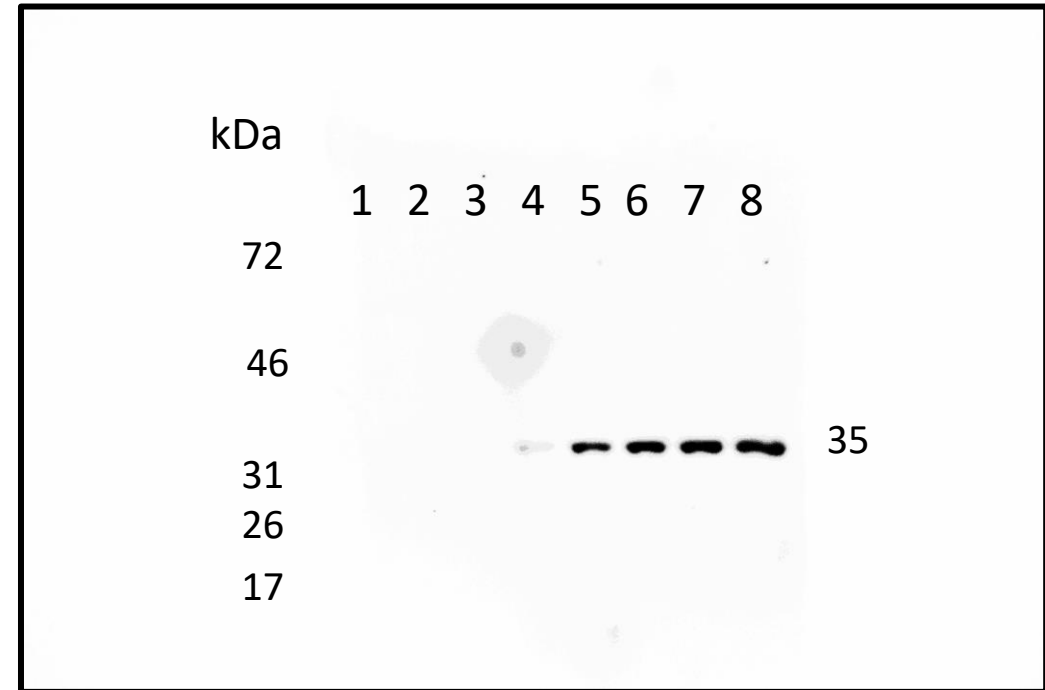

35kDa:0:0:0:1:38:59:82:100

# HT1080 24h treatment cleaved caspase 8

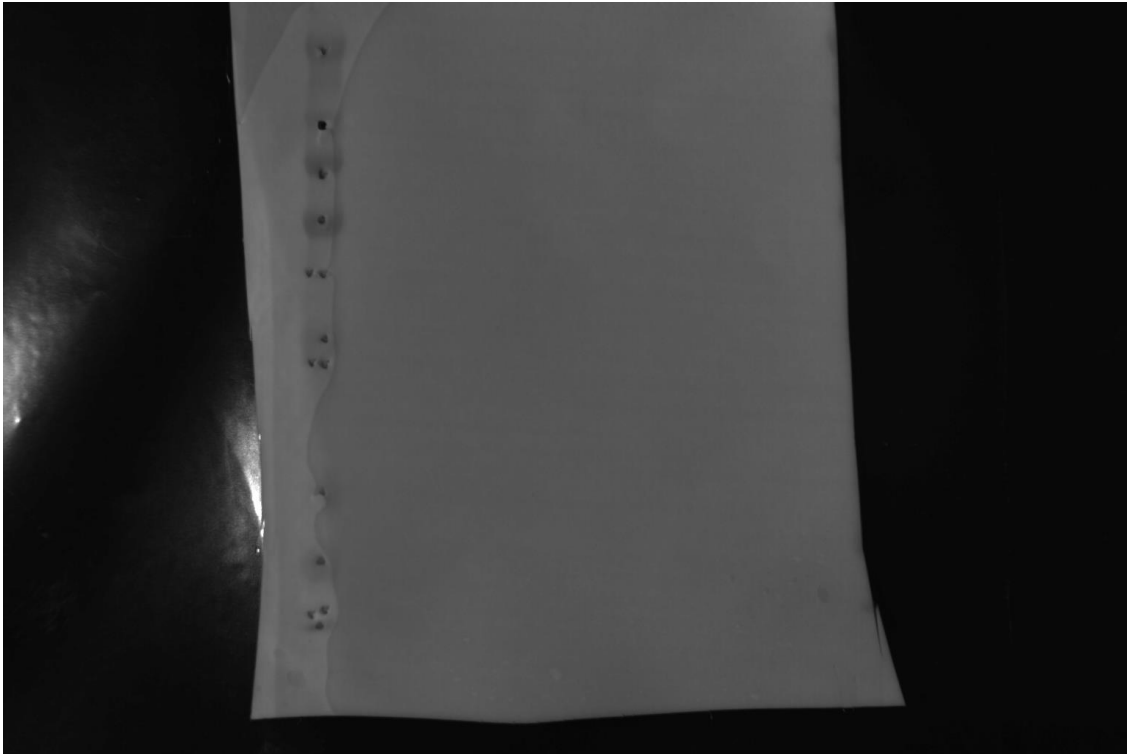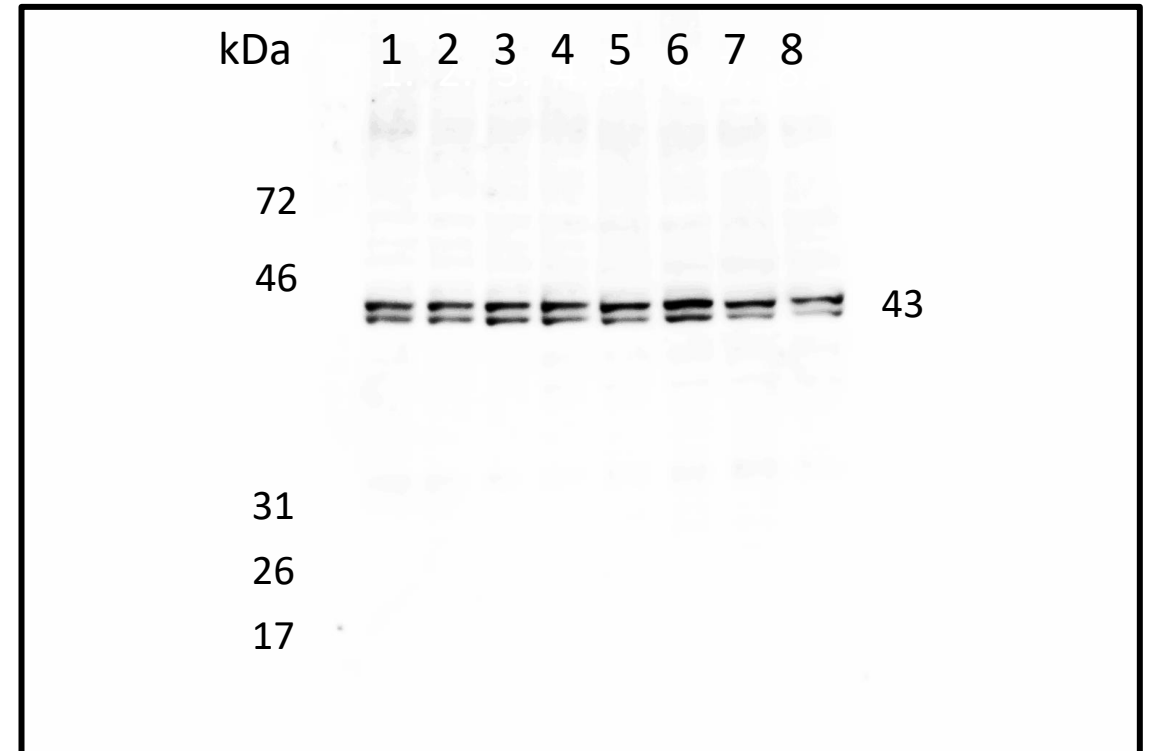

**43kDa:**100:80:105:105:122:174:95:66



# HT1080 24h treatment cleaved caspase 3

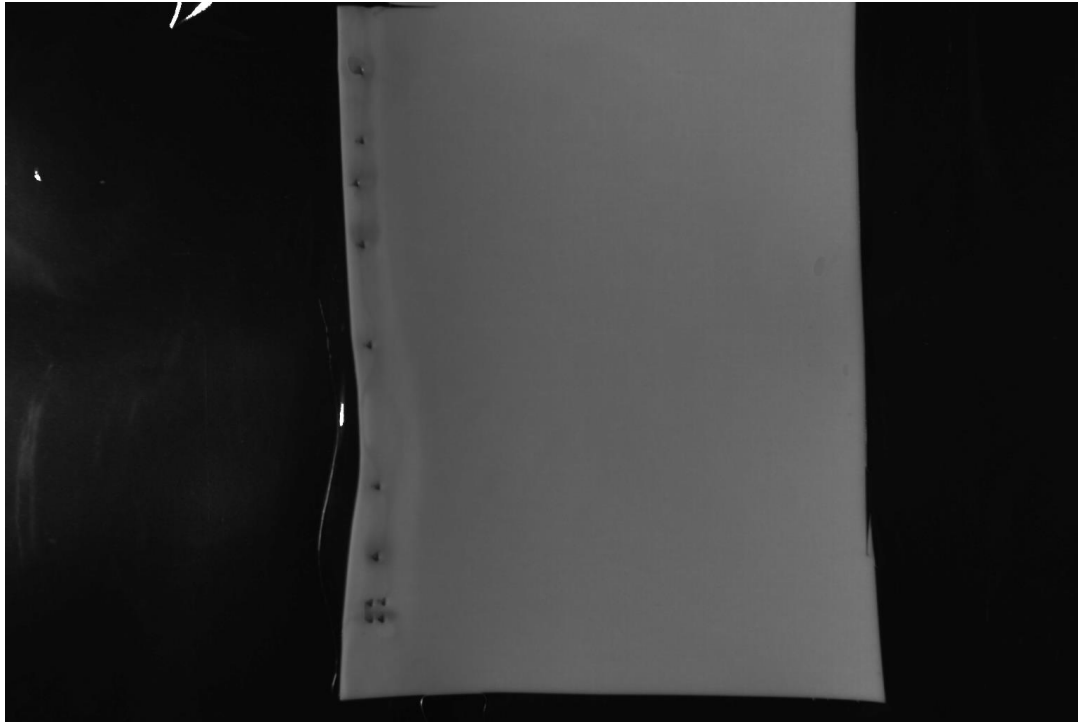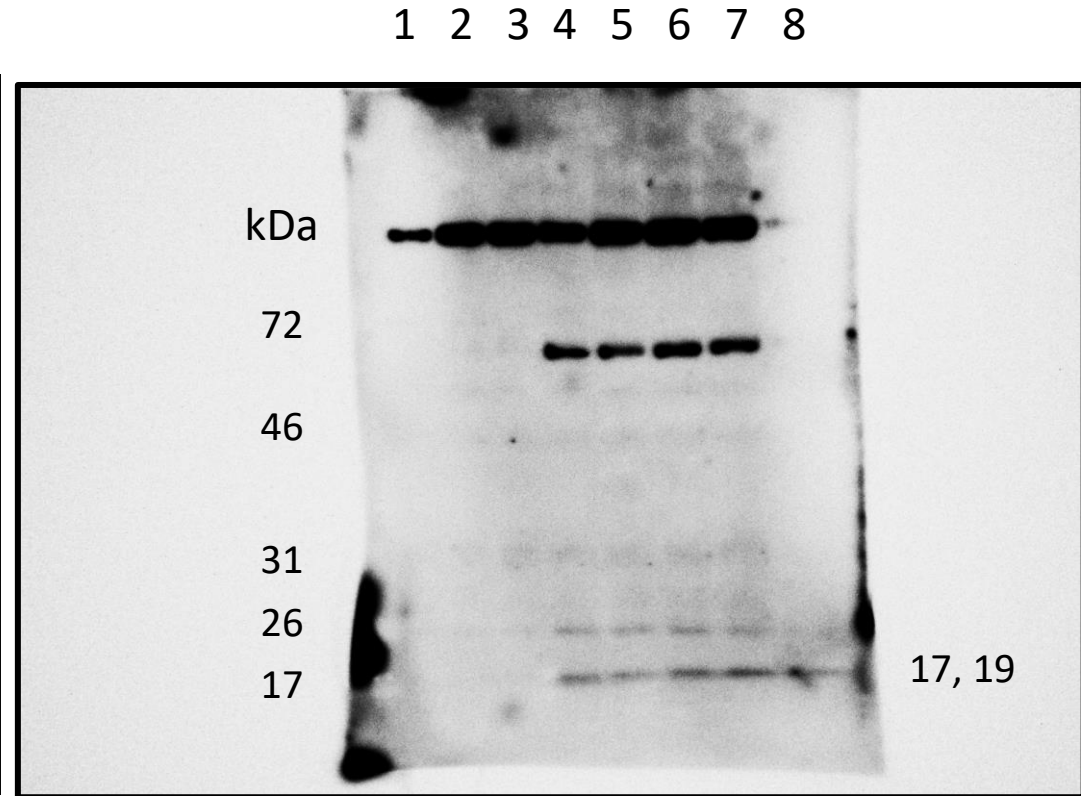

17,19kDa:0:3:4:52:39:86:102:100

# HT1080 24h treatment cleaved PARP

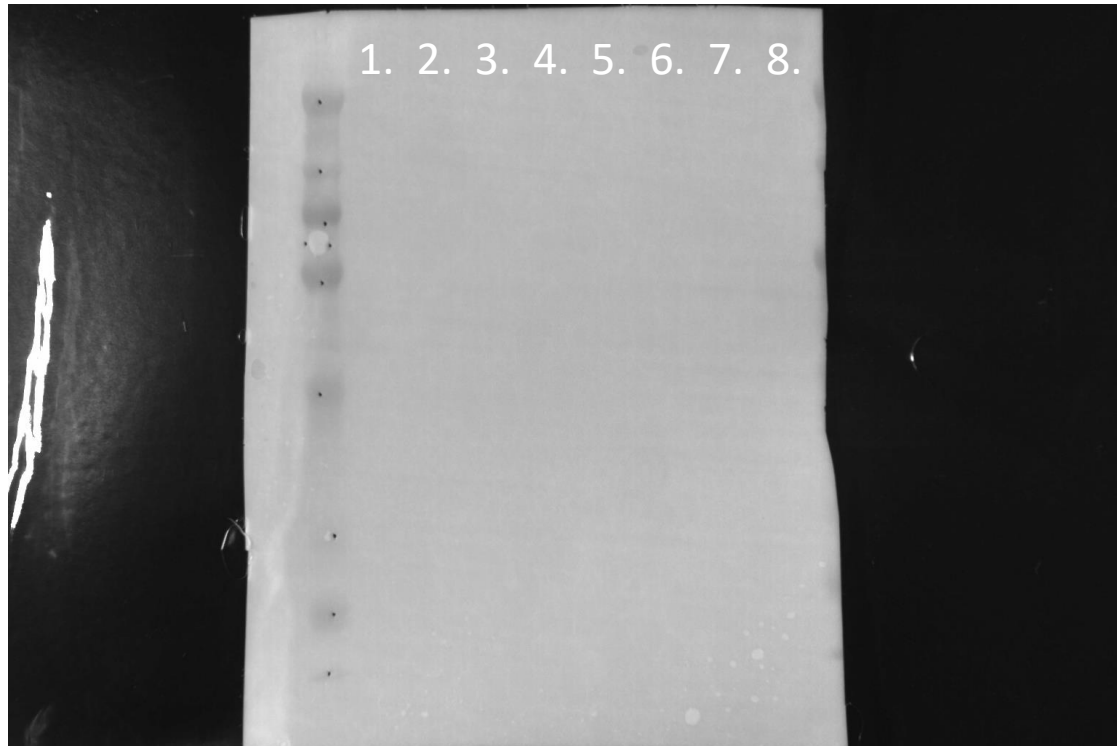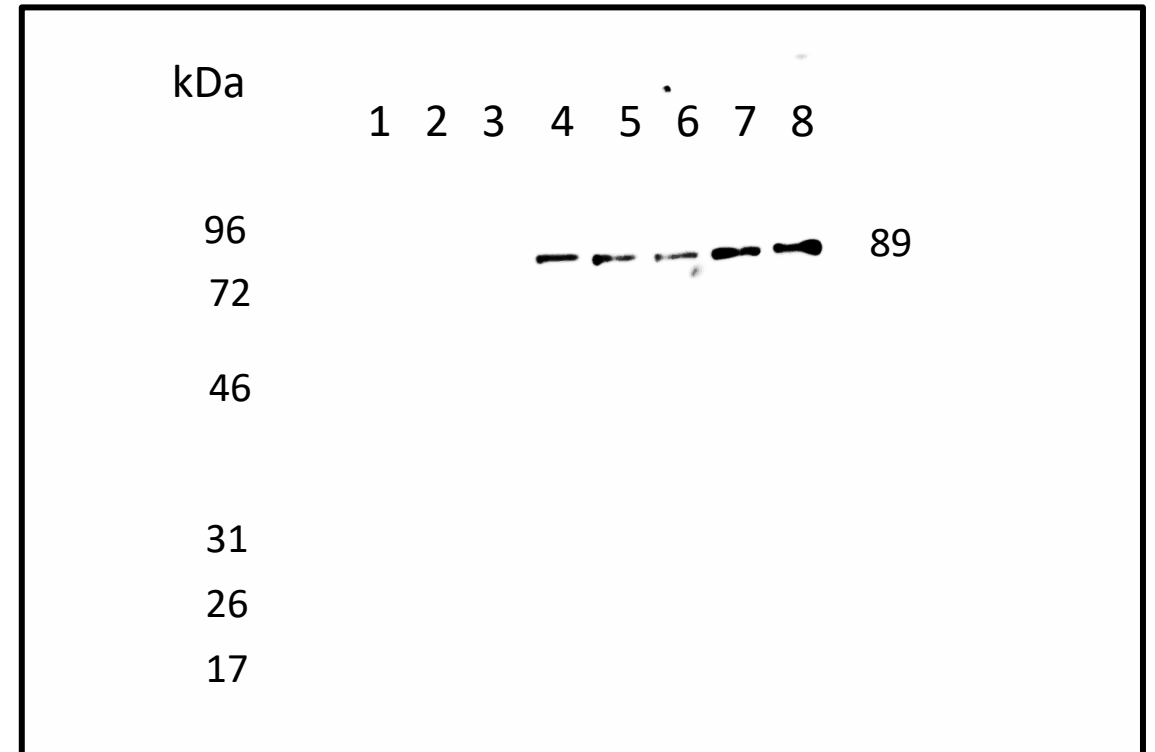

89kDa:0:0:0:35:27:15:88:100

# HT1080 24h treatment p-ERK

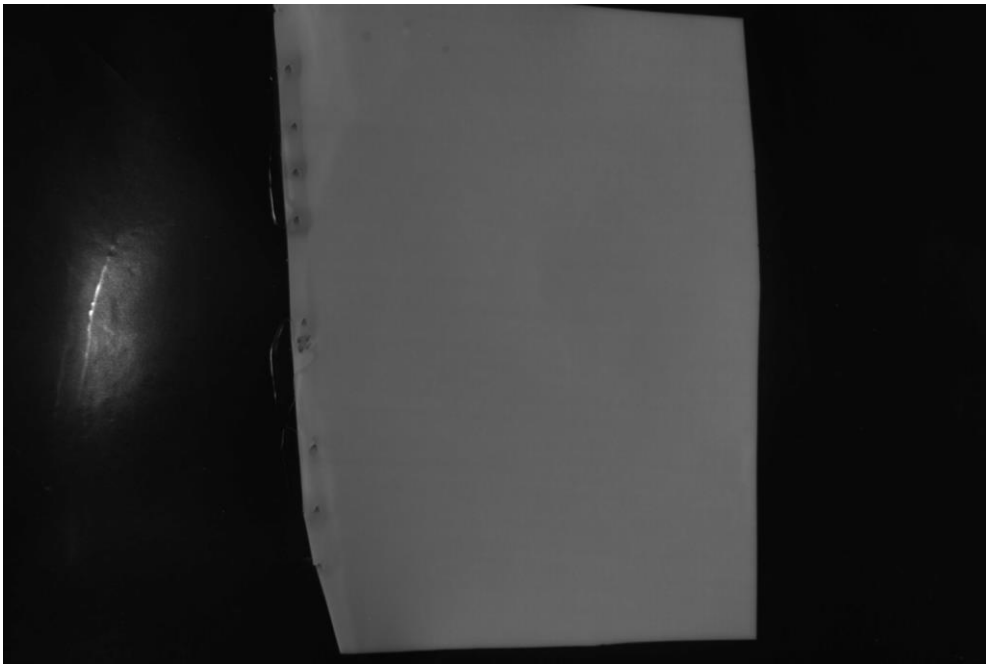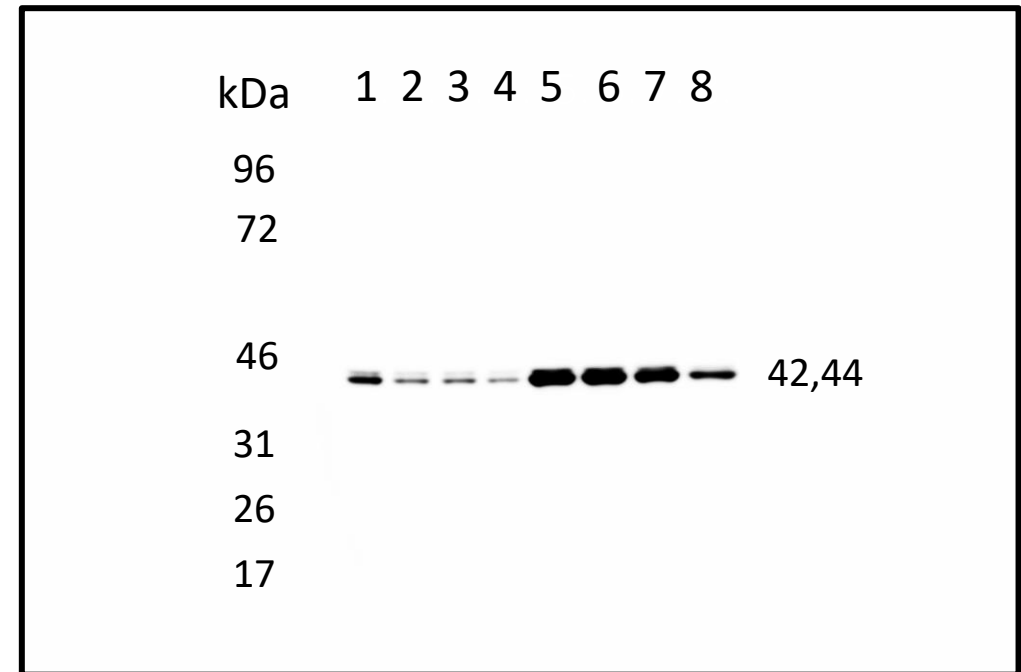

**42.44kDa:100:28:29:14:601:563:359:155**

# HT1080 24h treatment ERK

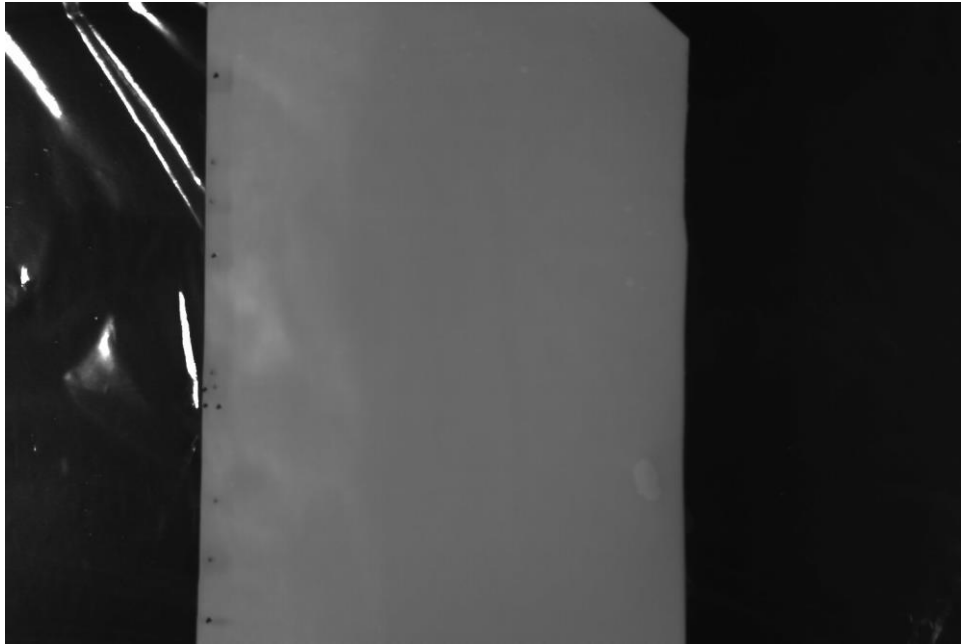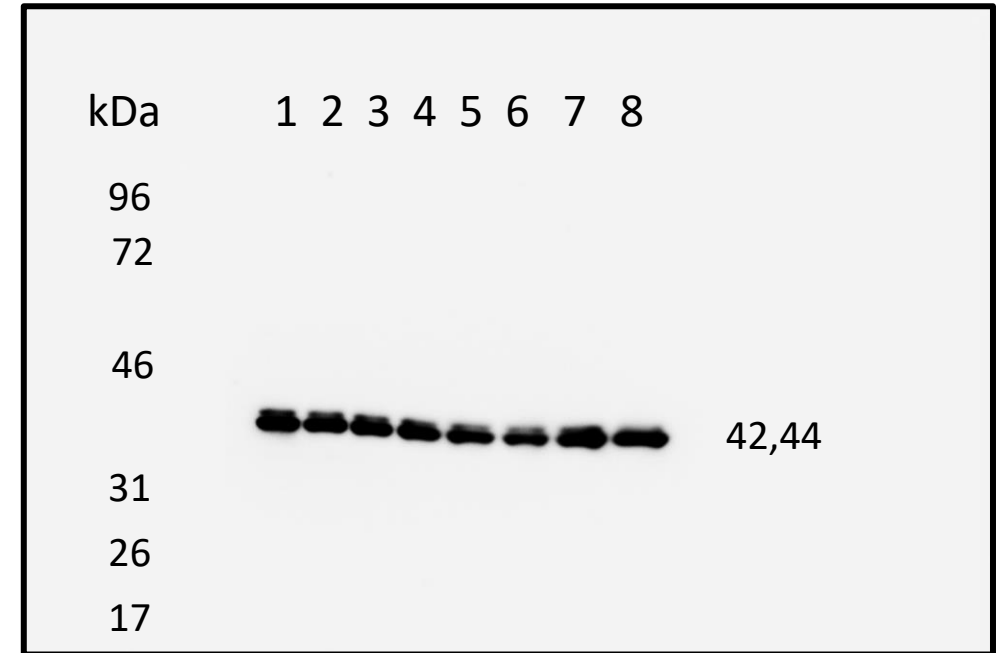

**42.44kDa:100:80:84:74:68:62:103:104**

# HT1080 24h treatment p-JNK

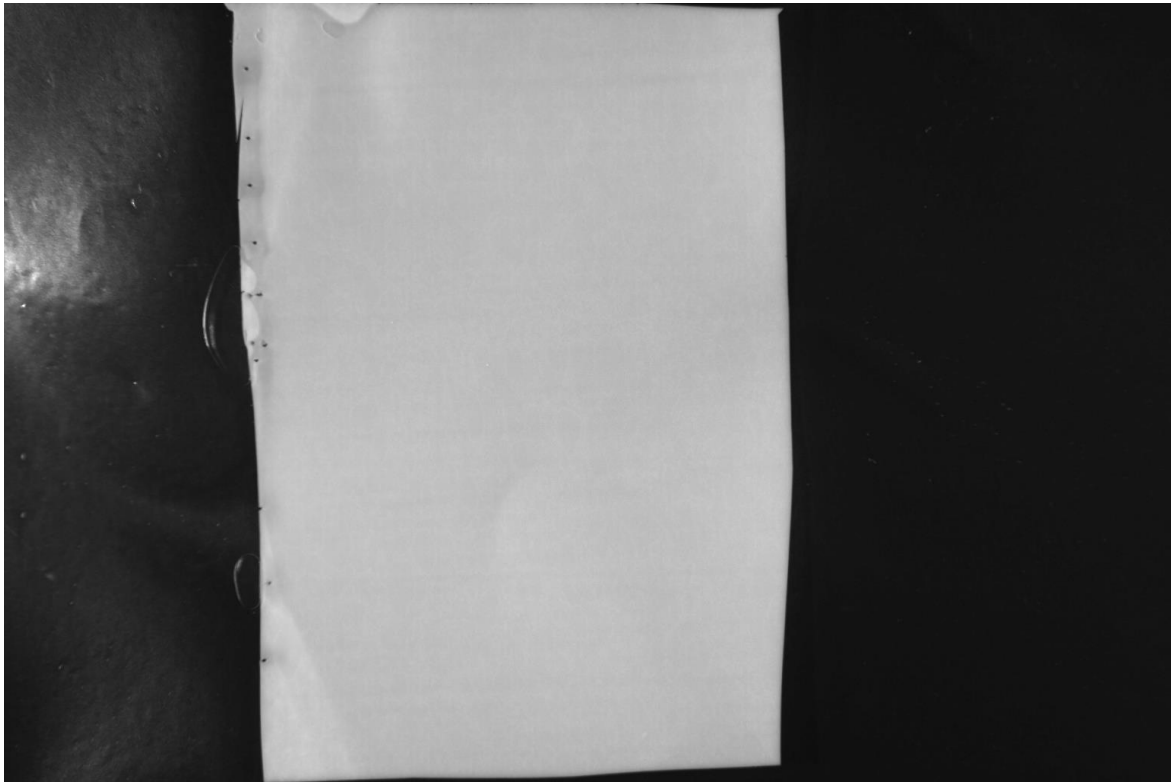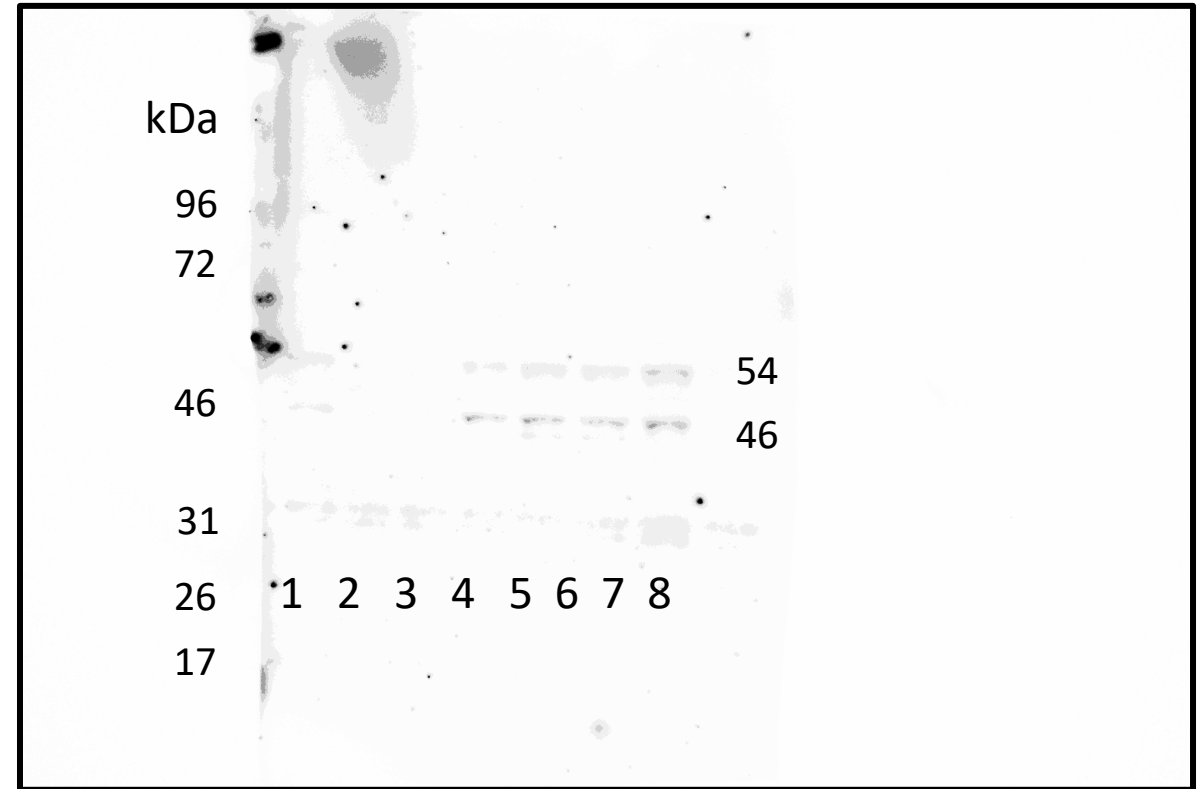

**54kDa:**100:115:82:122:115:159:164:47

**46kDa:**100:71:65:108:206:223:251:43

# HT1080 24h treatment JNK

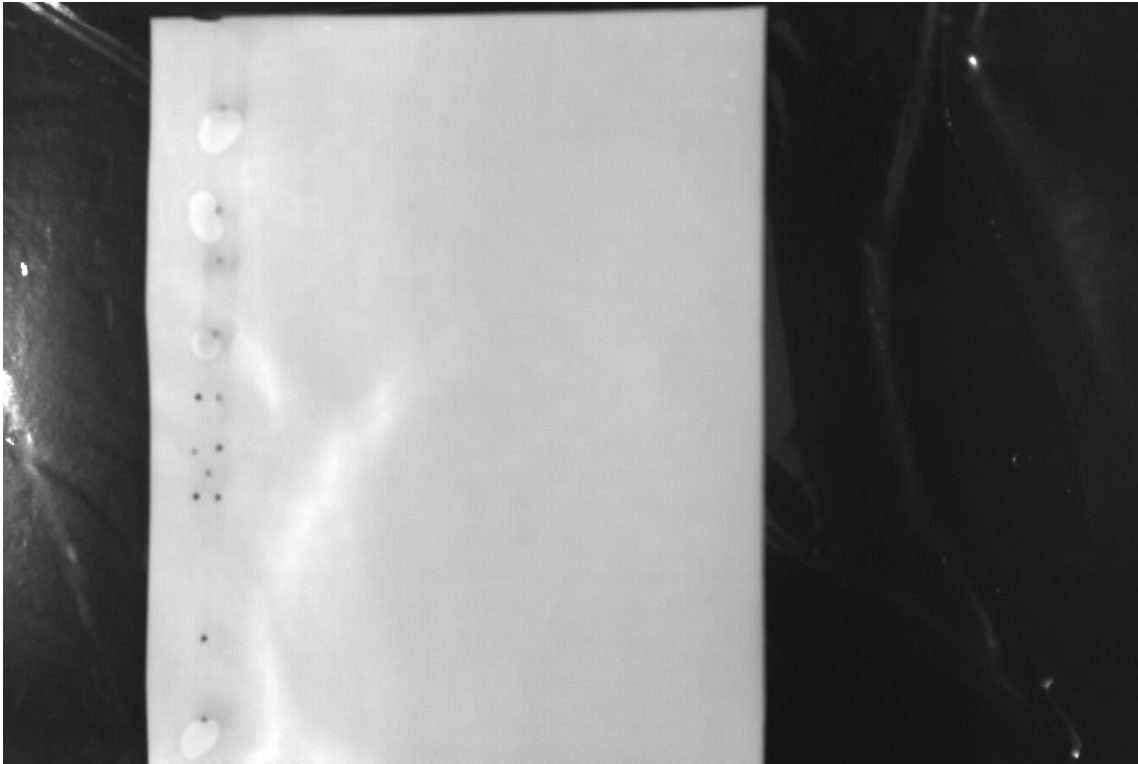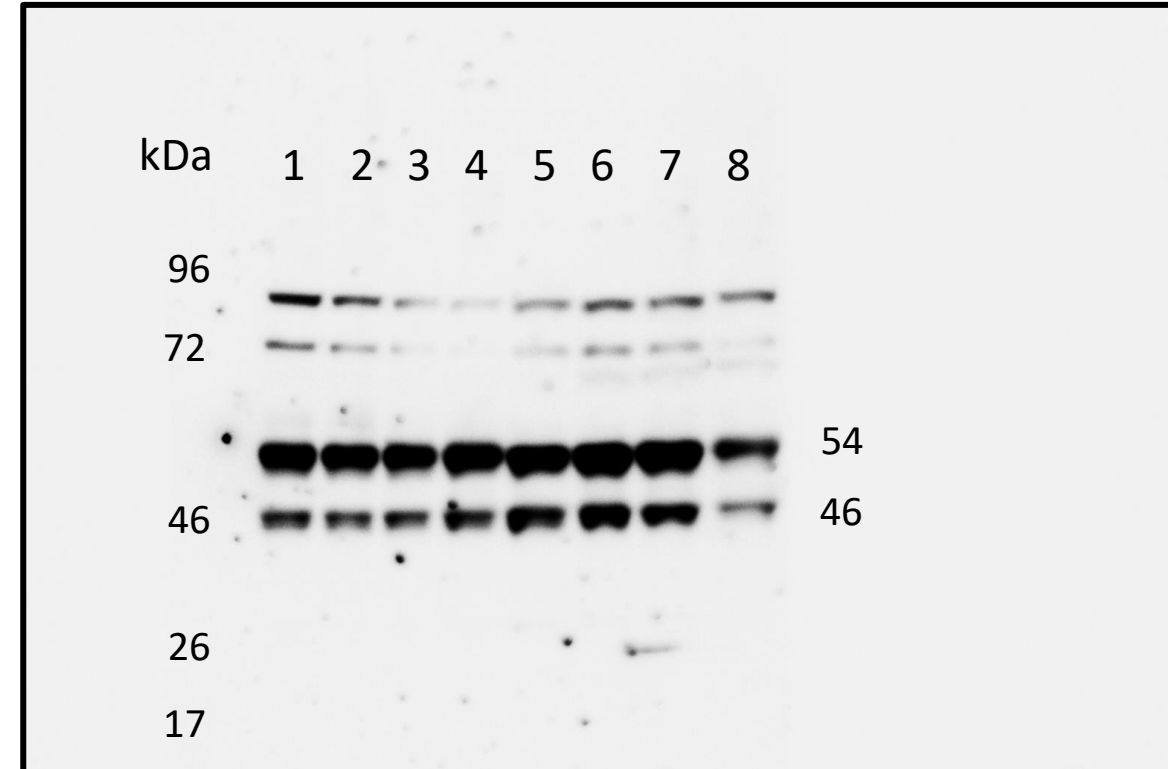

**54kDa:**100:122:104:125:168:183:227:62

**46kDa:**92:67:73:111:196:195:199:39

# HT1080 24h treatment p38

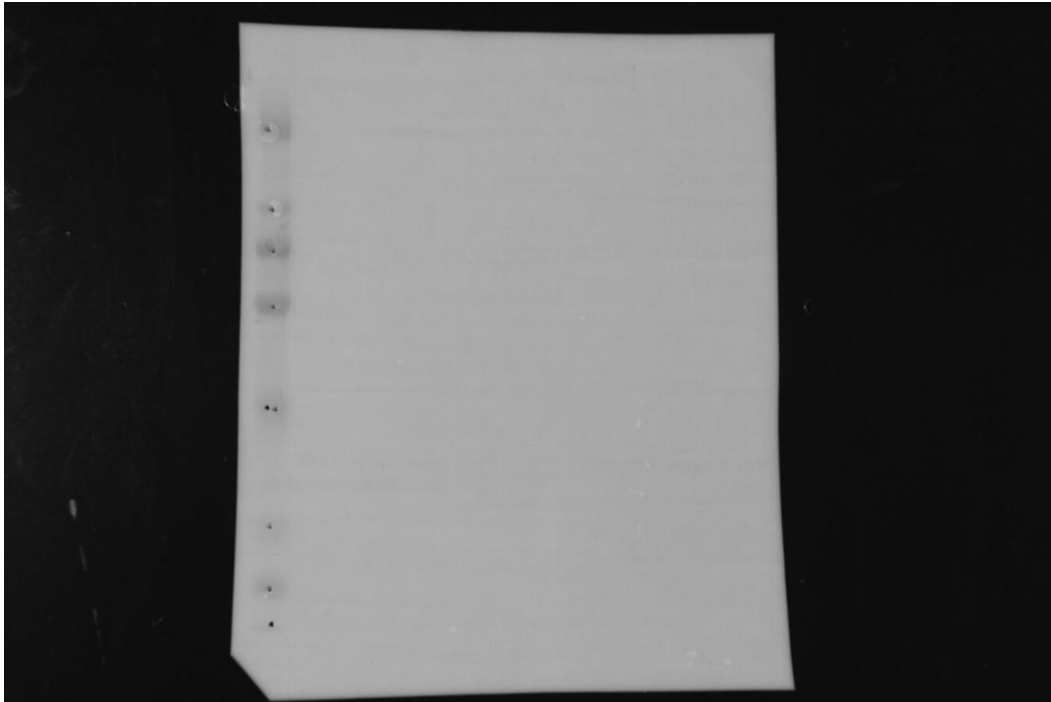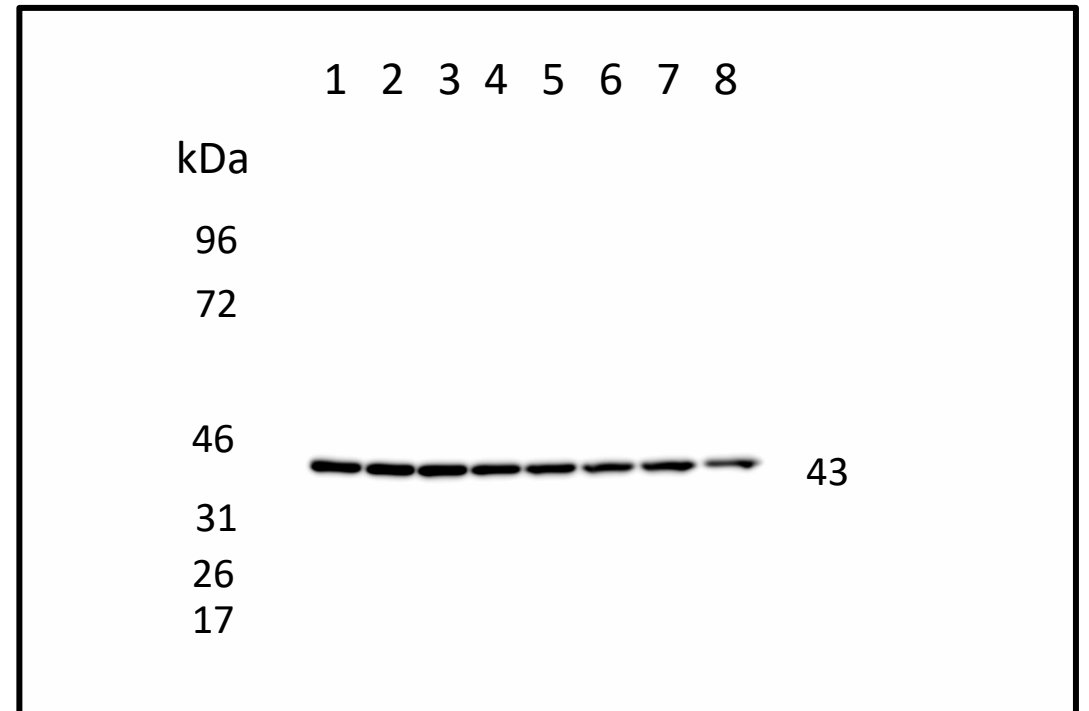

**43kDa:**100:112:124:98:89:68:85:46

# HT1080 24h treatment MYC

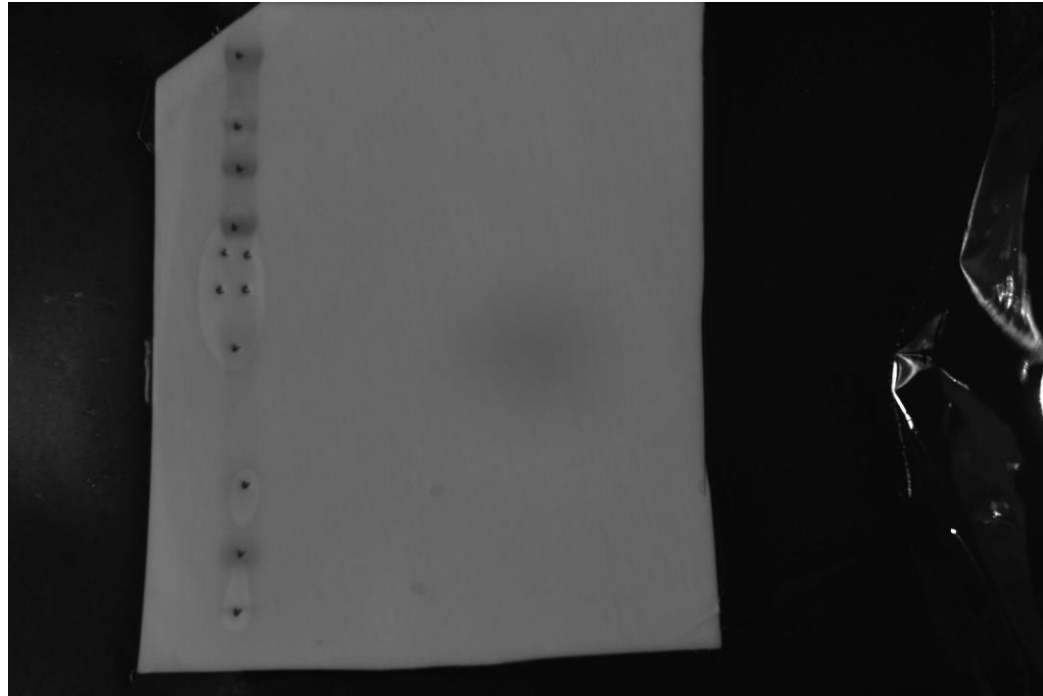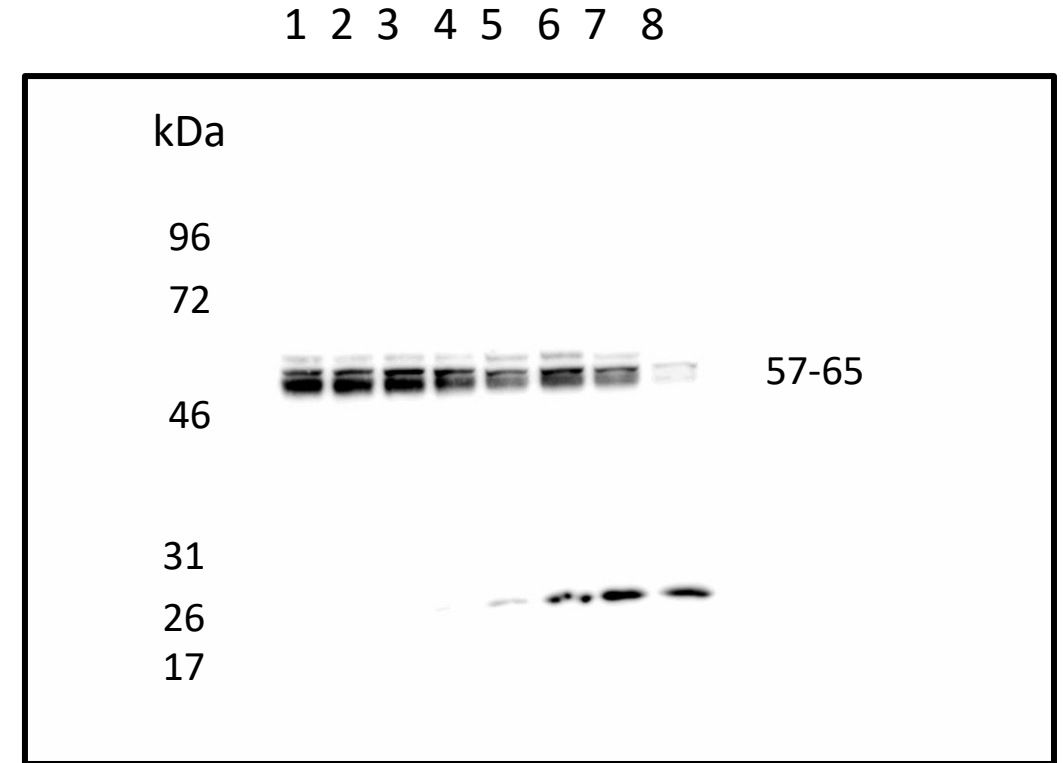

**57-65kDa:**100:105:121:62:37:63:34:3



# HT1080 24h treatment Survivin

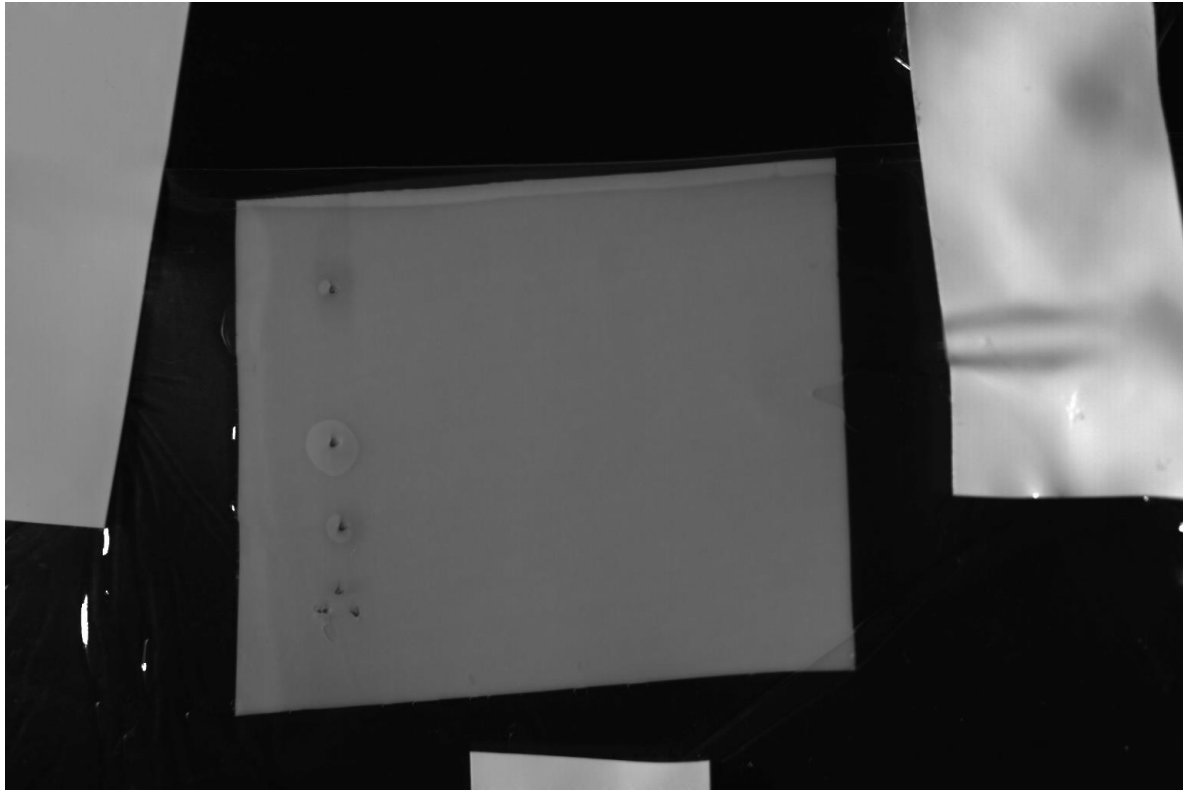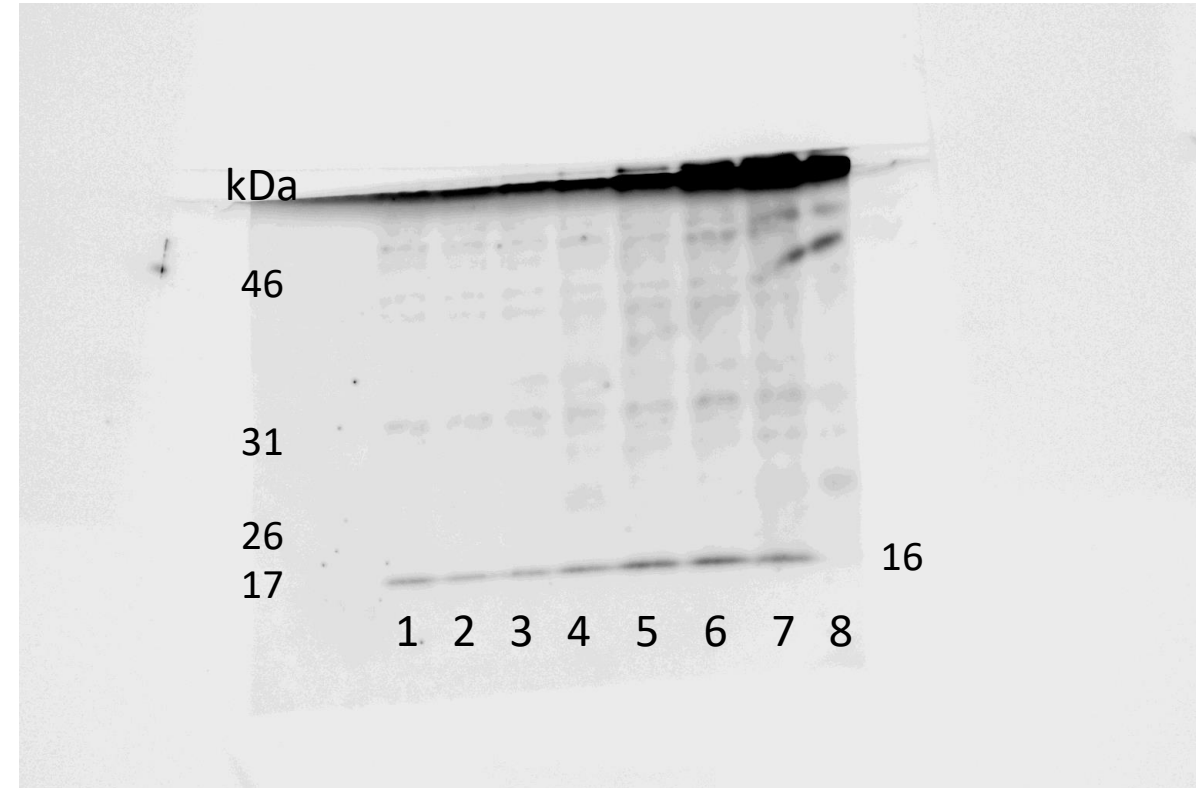

**16kDa:100:65:81:151:268:307:188:29**

# HT1080 24h treatment MCL-1

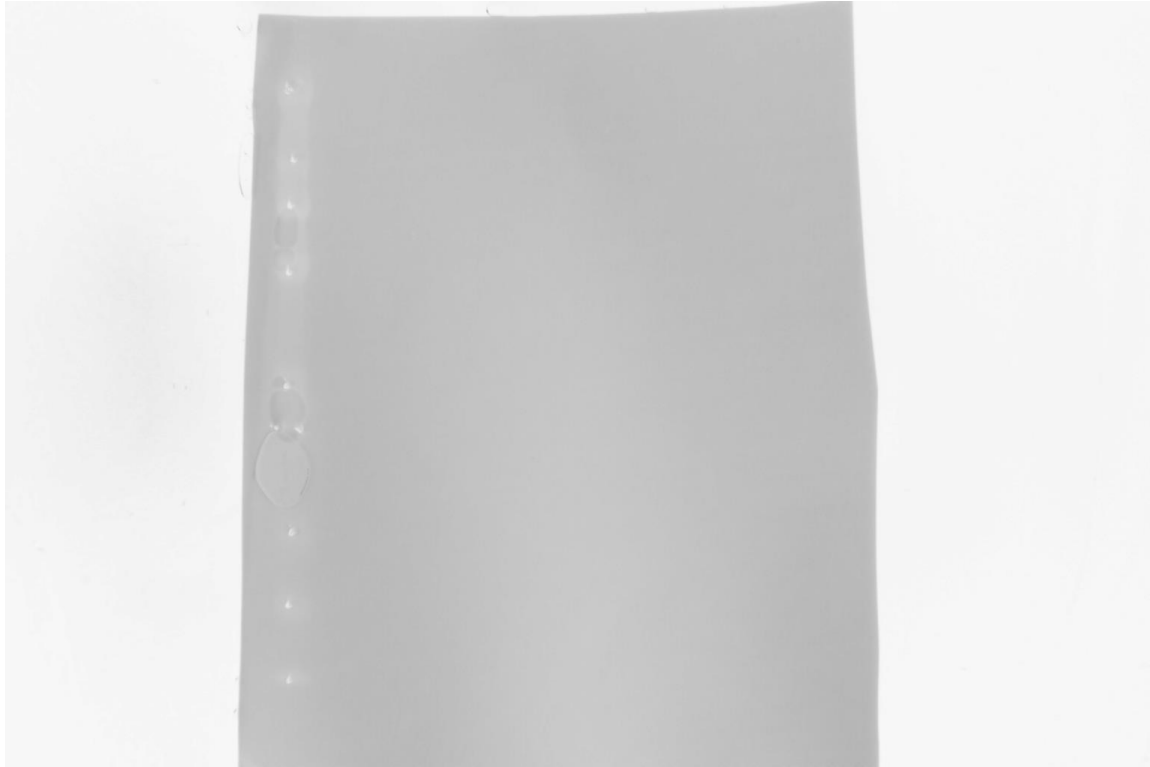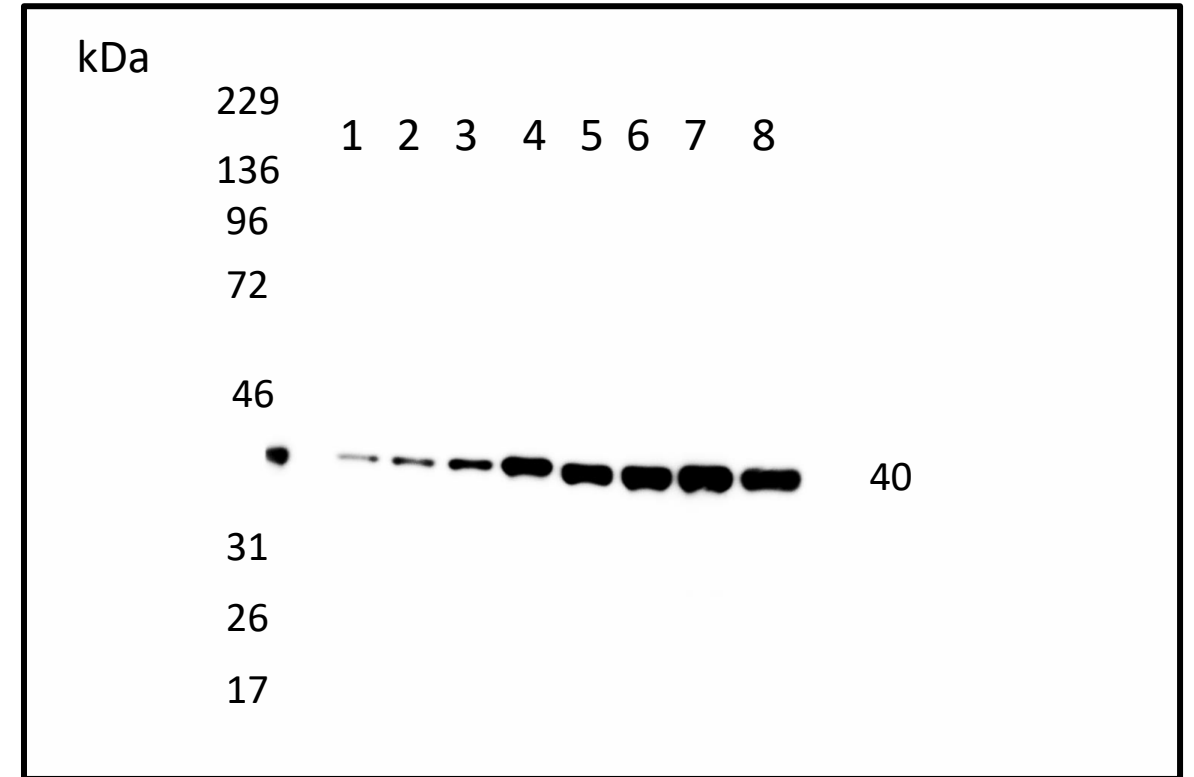

40kDa:2:8:27:87:88:104:125:100

# HT1080 24 h treatment p-AKT

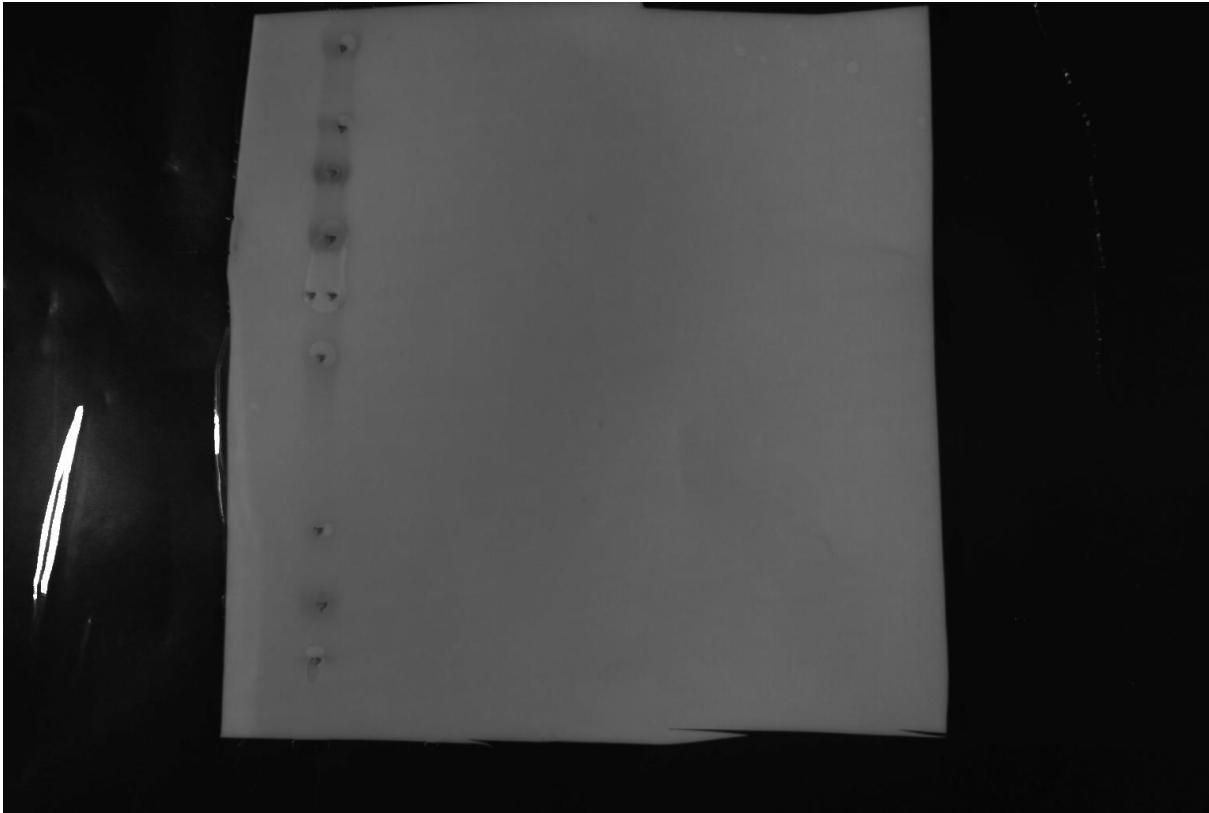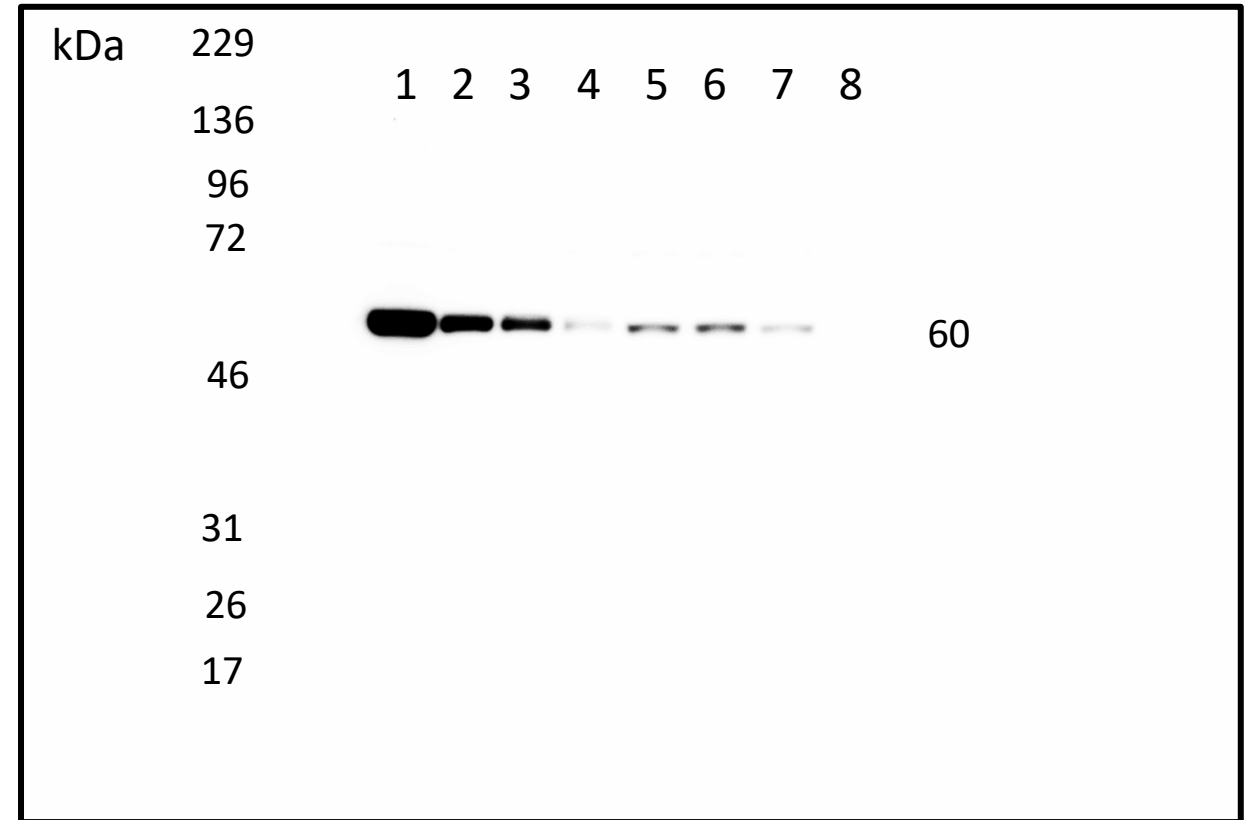

60kDa: 100:26:11:0:3:3:0:0

# HT1080 24 h treatment AKT

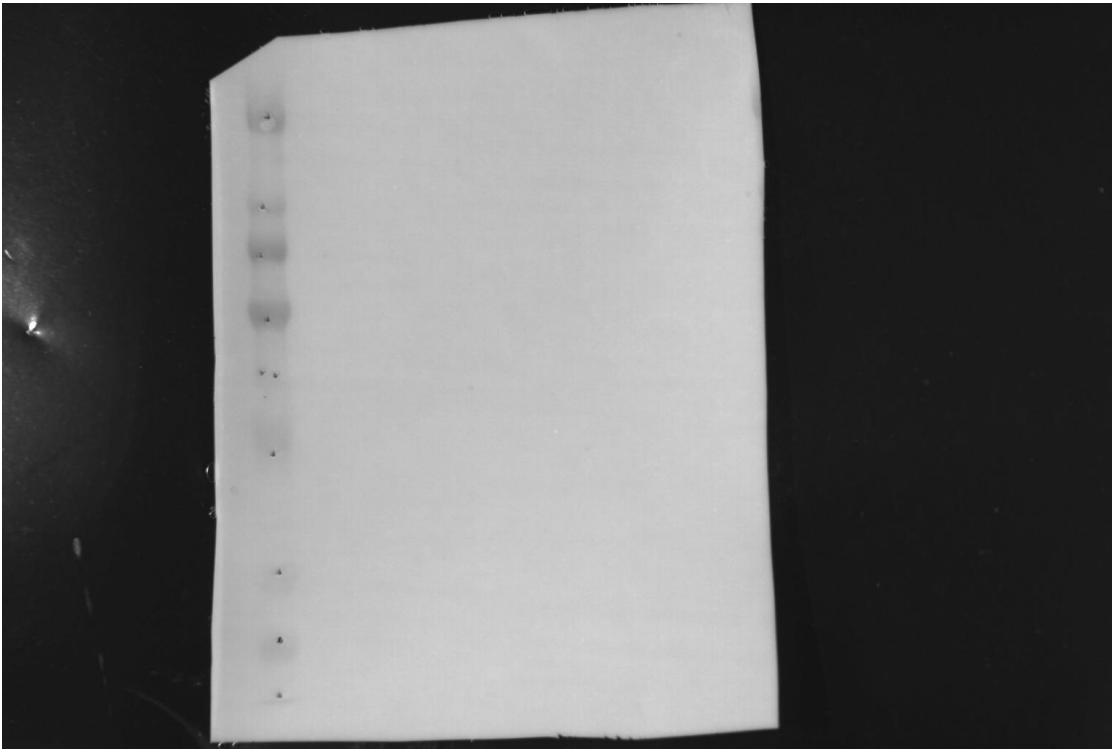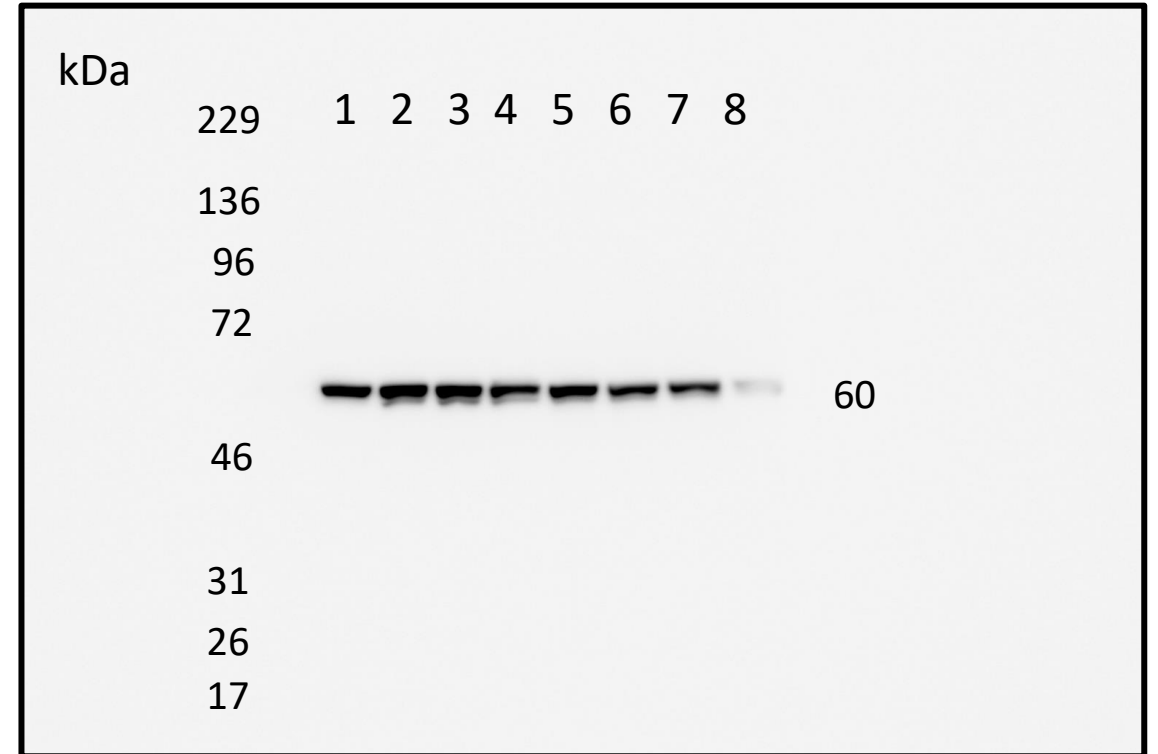

**60kDa:** 100:124:115:88:101:71:58:6

# Lane No. LM8 treatment 6 h, 12 h

## Treatment time 6 h

- 1. Everolimus 0  $\mu\text{M}$
- 2. Everolimus 5  $\mu\text{M}$
- 3. Everolimus 10  $\mu\text{M}$
- 4. Everolimus 0  $\mu\text{M}$  Bortezomib 2.5nM
- 5. Everolimus 5  $\mu\text{M}$  Bortezomib 2.5nM
- 6. Everolimus 10  $\mu\text{M}$  Bortezomib 2.5nM

## Treatment time 12 h

- 7. Everolimus 0  $\mu\text{M}$
- 8. Everolimus 5  $\mu\text{M}$
- 9. Everolimus 10  $\mu\text{M}$
- 10. Everolimus 0  $\mu\text{M}$  Bortezomib 2.5nM
- 11. Everolimus 5  $\mu\text{M}$  Bortezomib 2.5nM
- 12. Everolimus 10  $\mu\text{M}$  Bortezomib 2.5nM

# LM8 6 h 12 h treatment $\beta$ actin

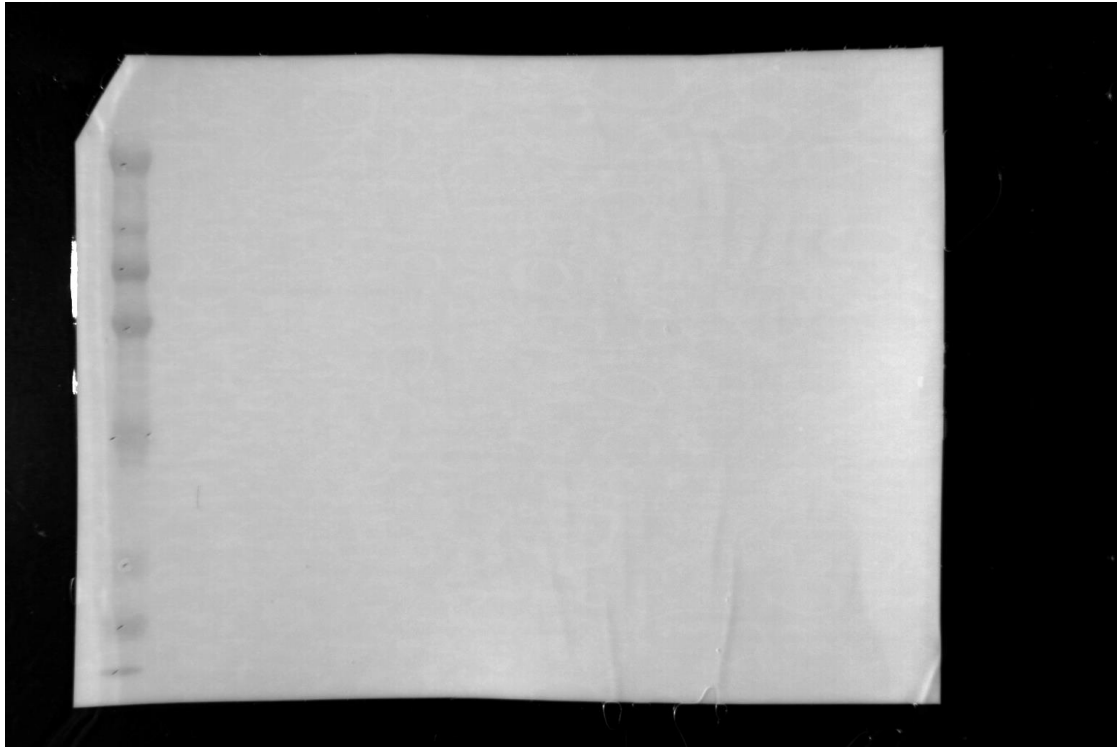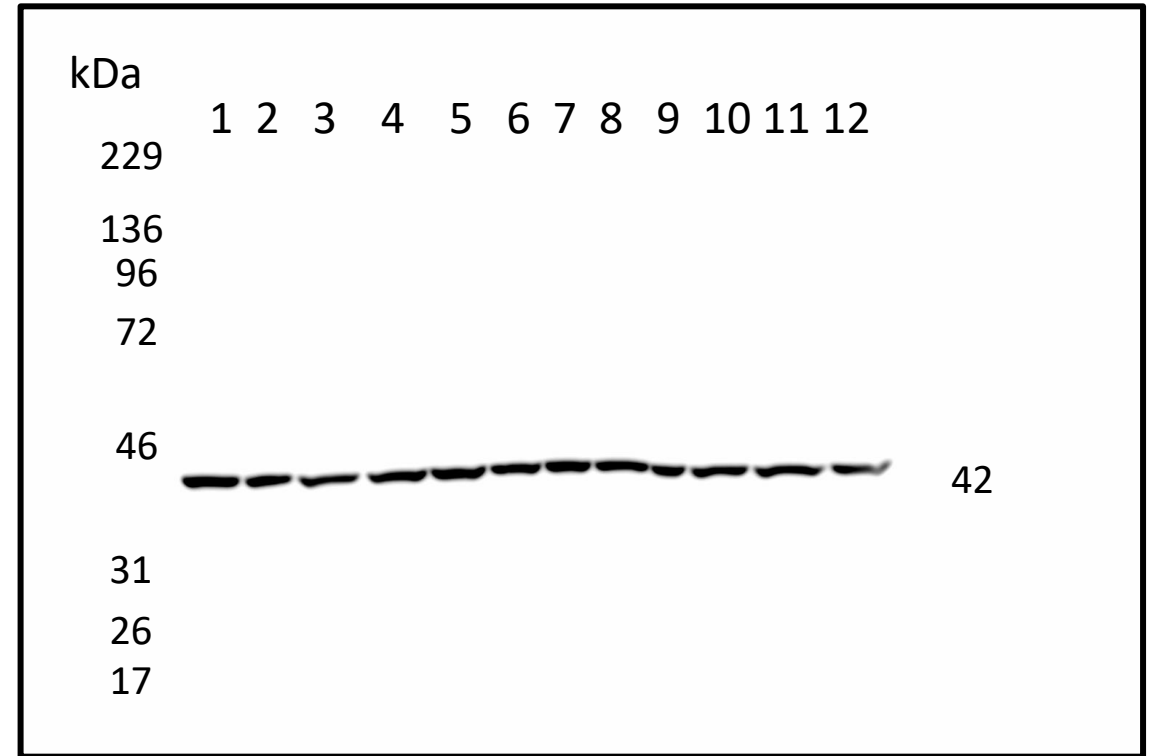

**42kDa:**100:44:45:71:69:58:55:70:39:63:60:31

# LM8 6 h 12 h treatment cleaved caspase 3

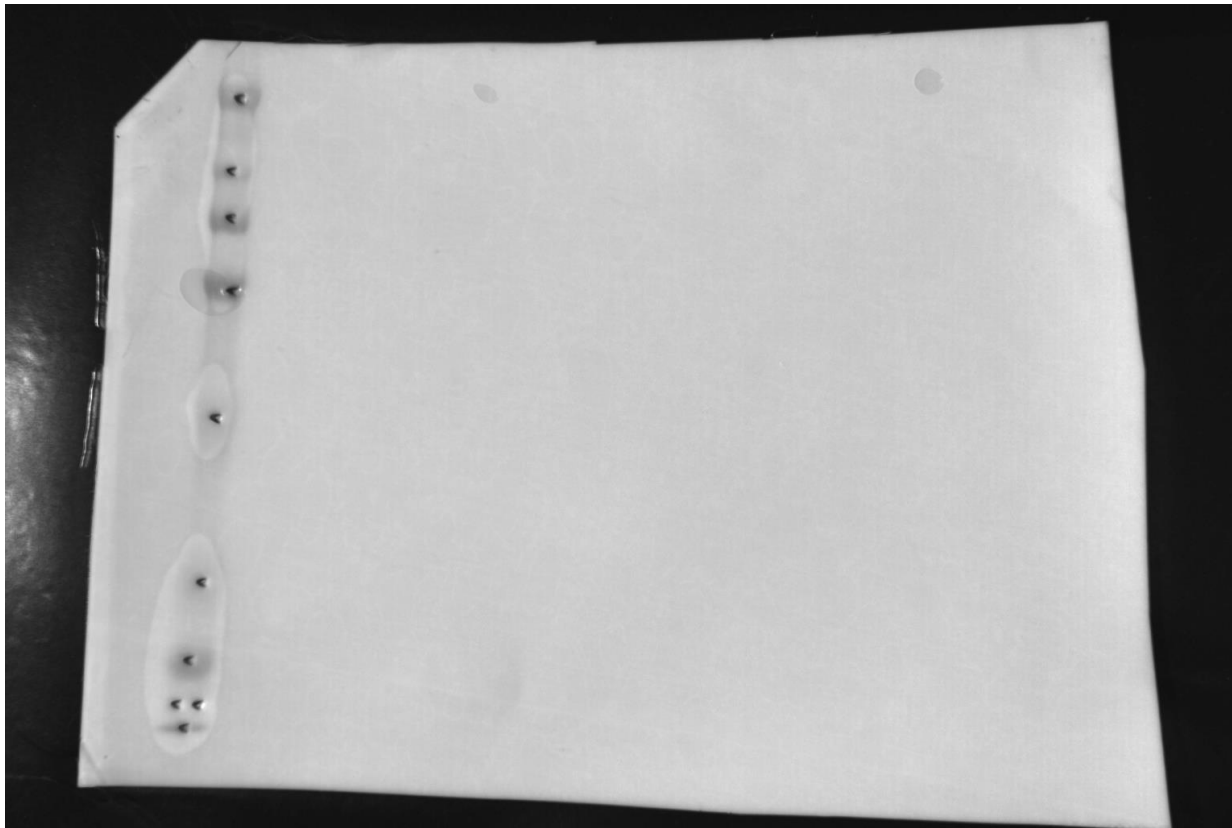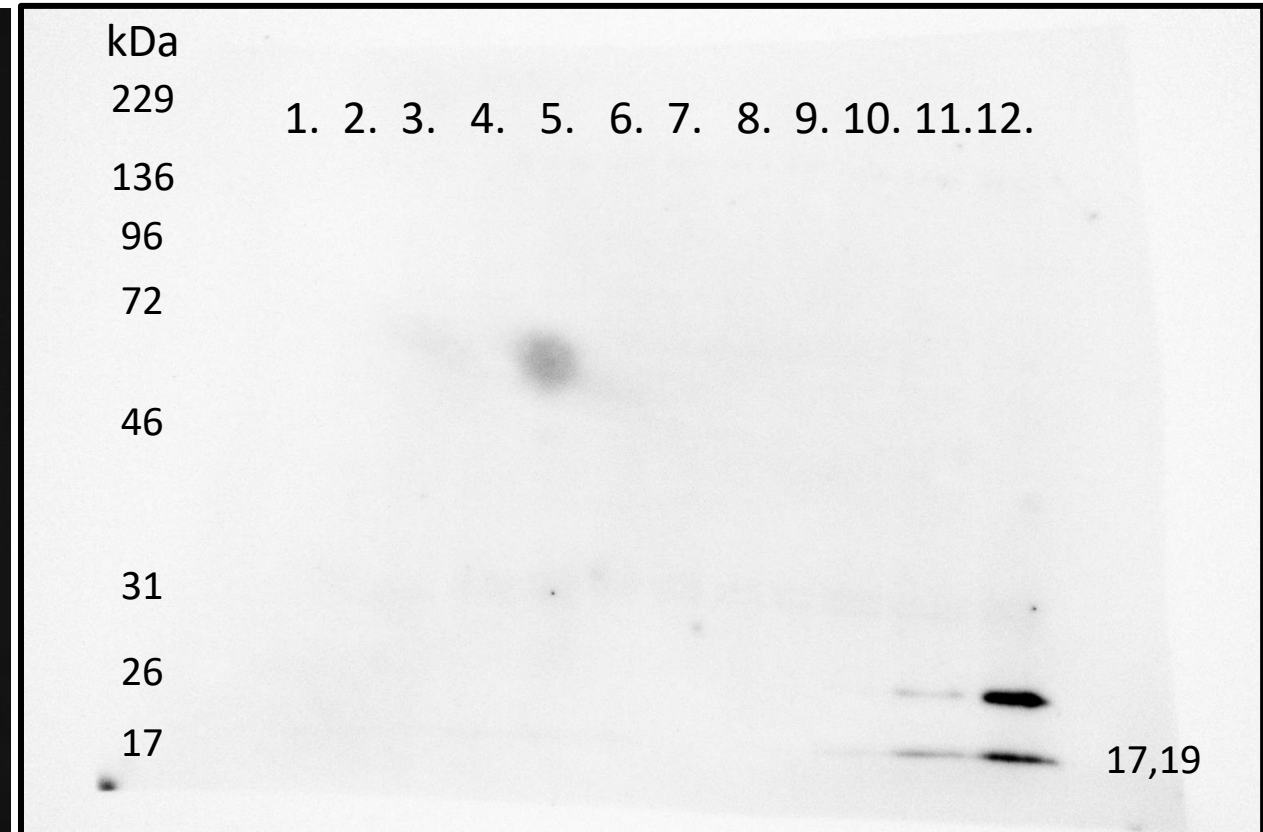

**17,19kDa:0:0:0:0:0:0:0:0:0:0:4:16:100**

# LM8 6 h 12 h treatment cleaved PARP

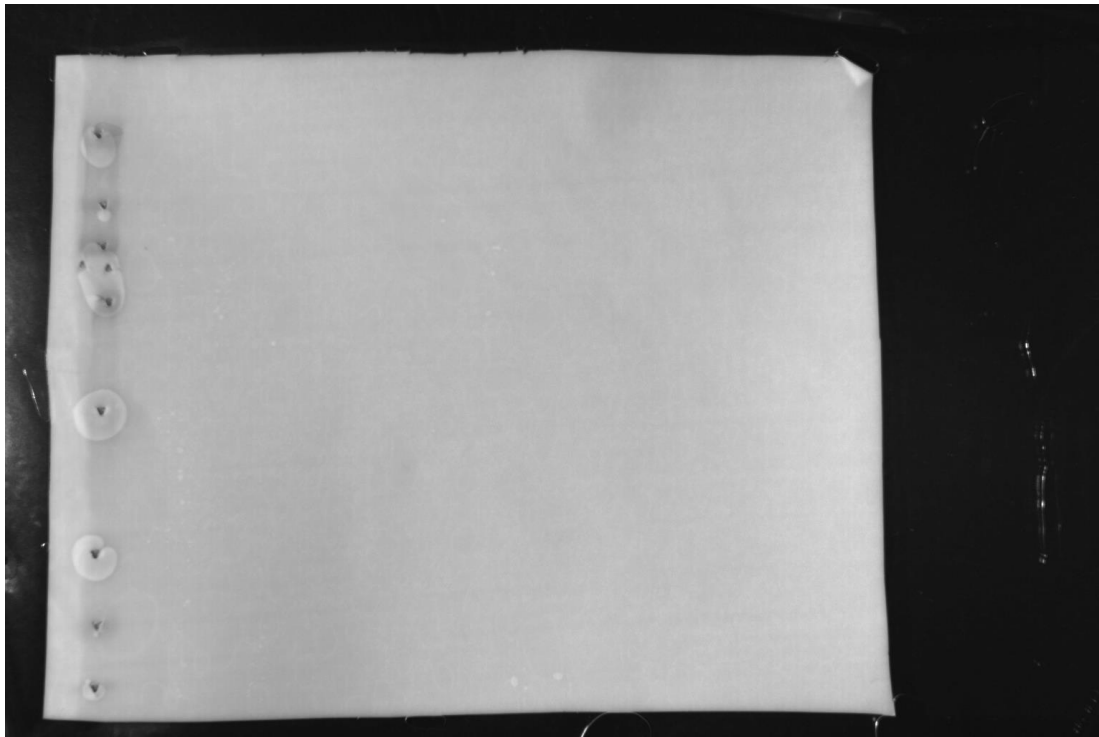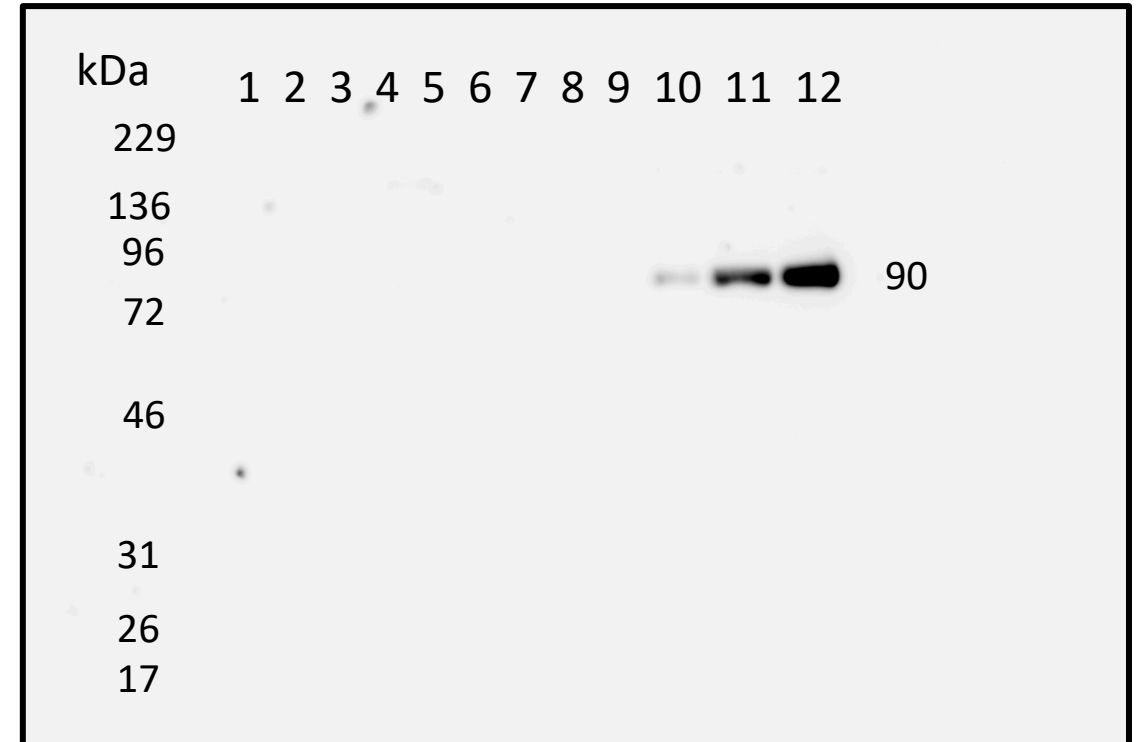

90kDa:0:0:0:0:0:0:0:0:0:0:2:23:100



# LM8 6 h 12 h treatment p-ERK

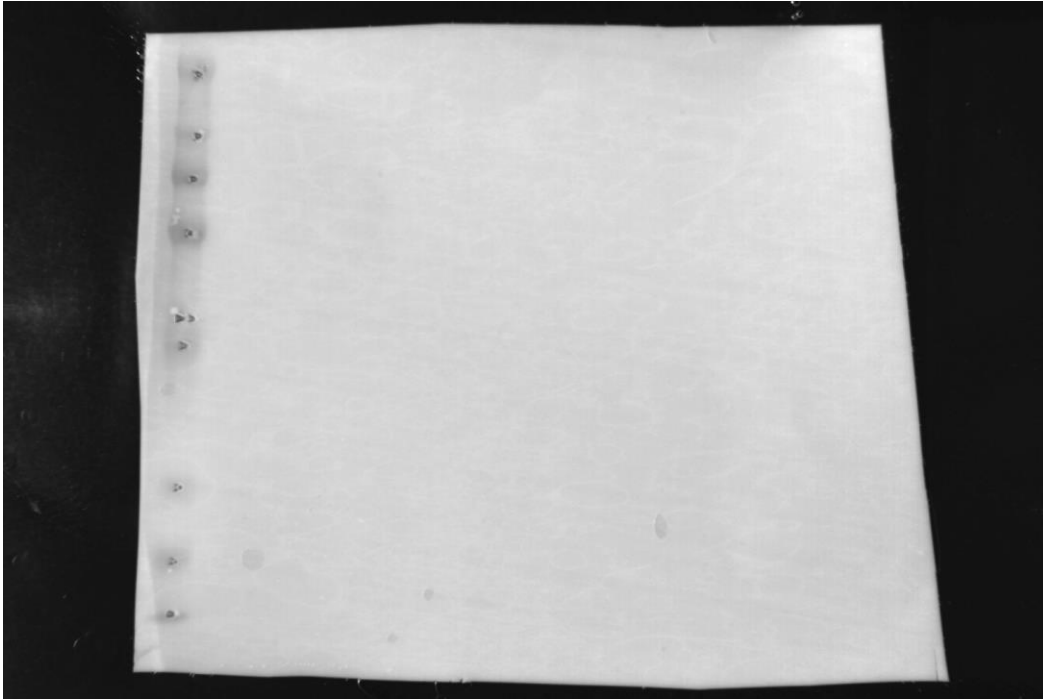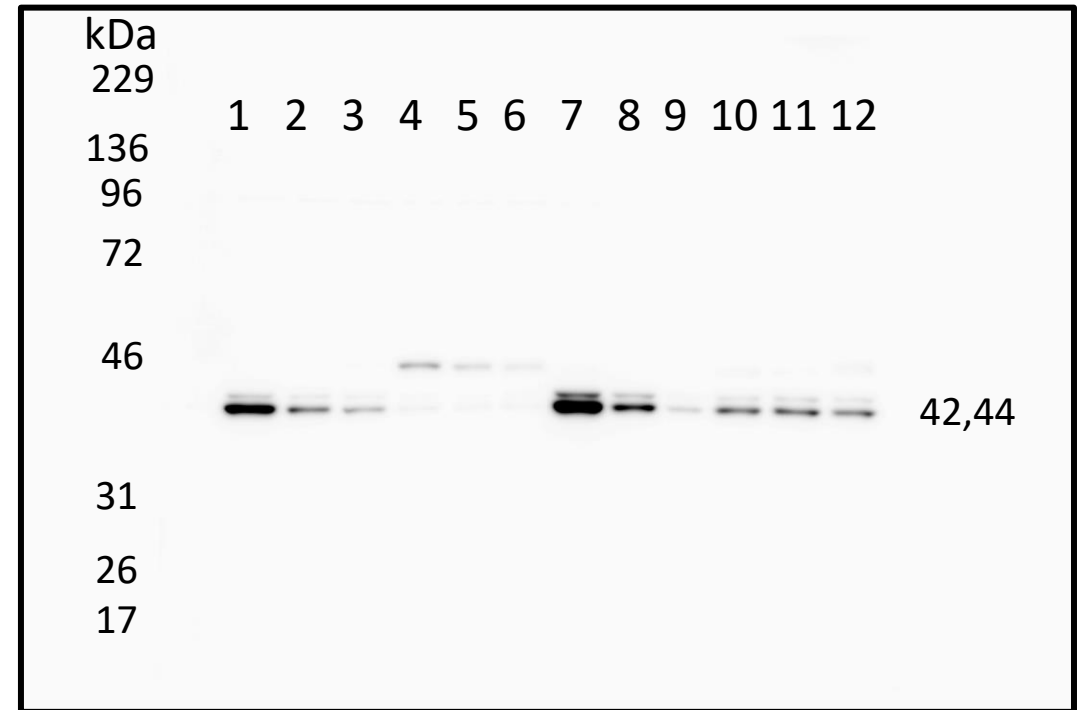

**42,44kDa:**100:16:7:1:0:1:147:42:4:19:20:15

# LM8 6 h 12 h treatment ERK

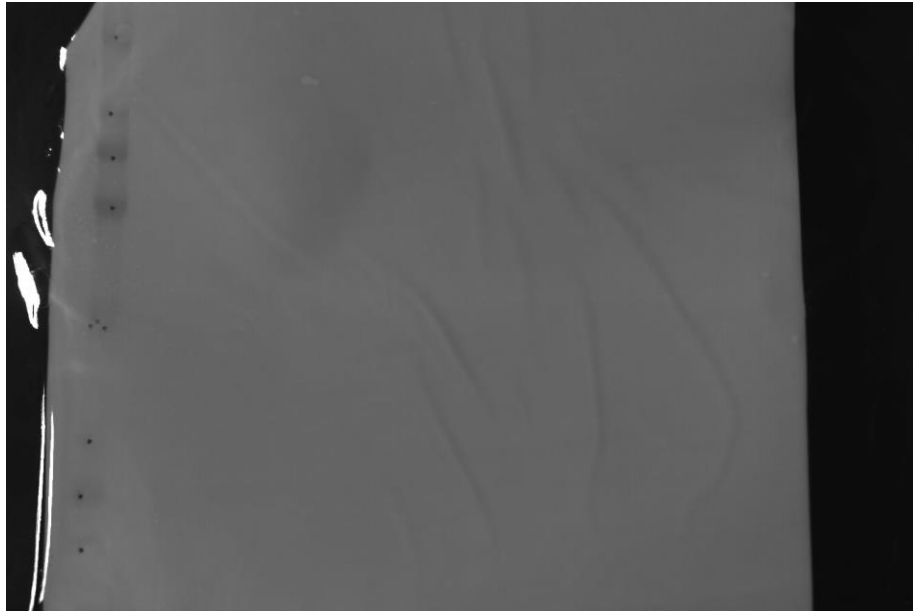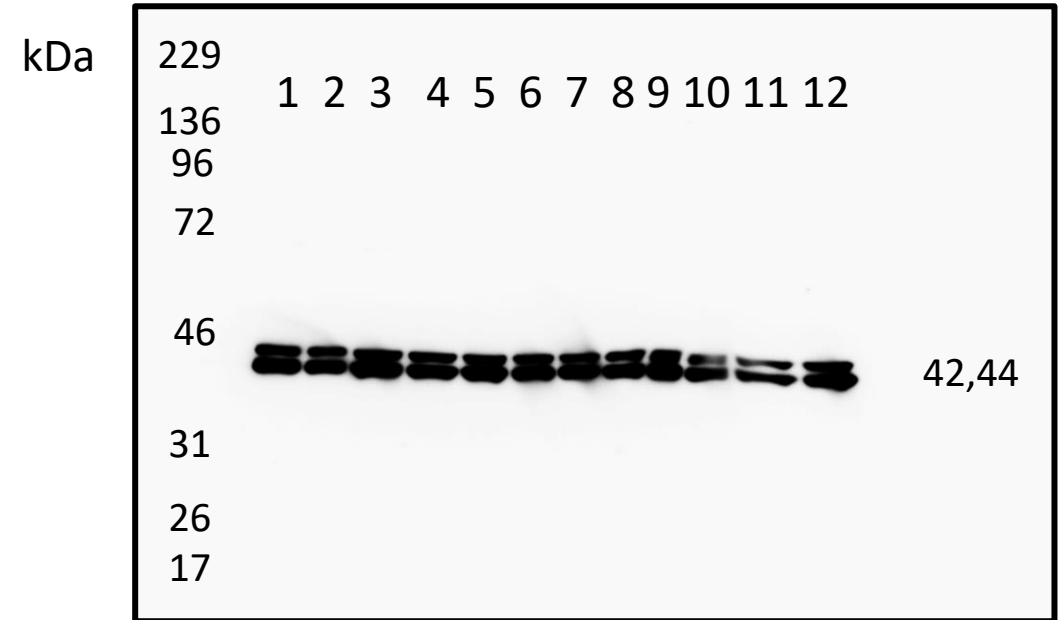

**42,44kDa:100:85:120:88:99:92:90:82:67:51:32:62**

# LM8 6 h 12 h treatment p-JNK

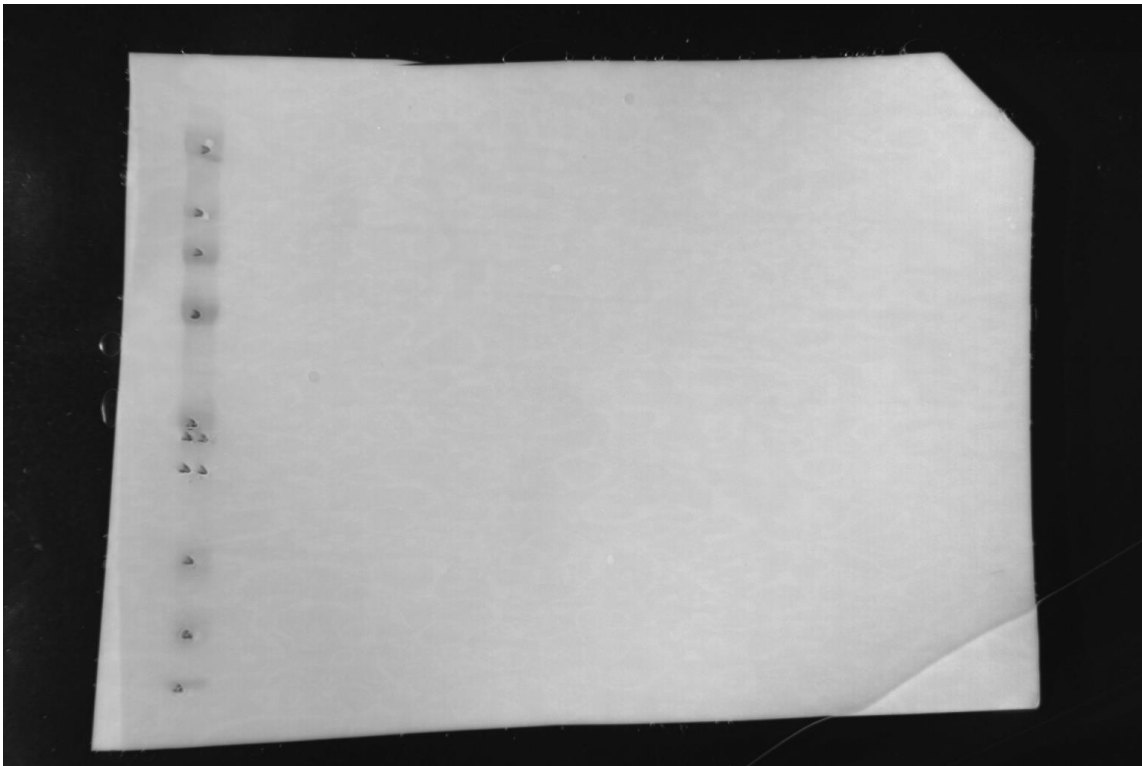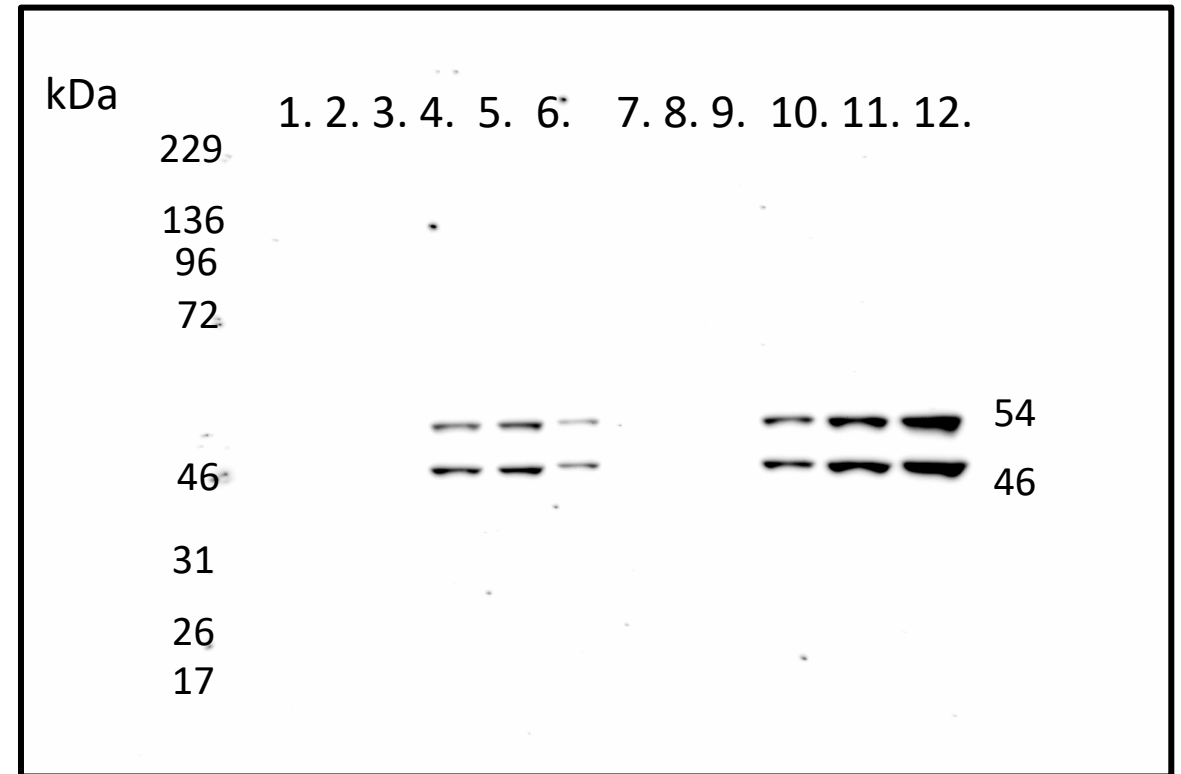

**54kDa:**0:0:0:13:17:3:0:0:0:0:22:70:100

**46kDa:**0:0:0:25:29:7:0:0:0:0:32:94:148

# LM8 6 h 12 h treatment JNK

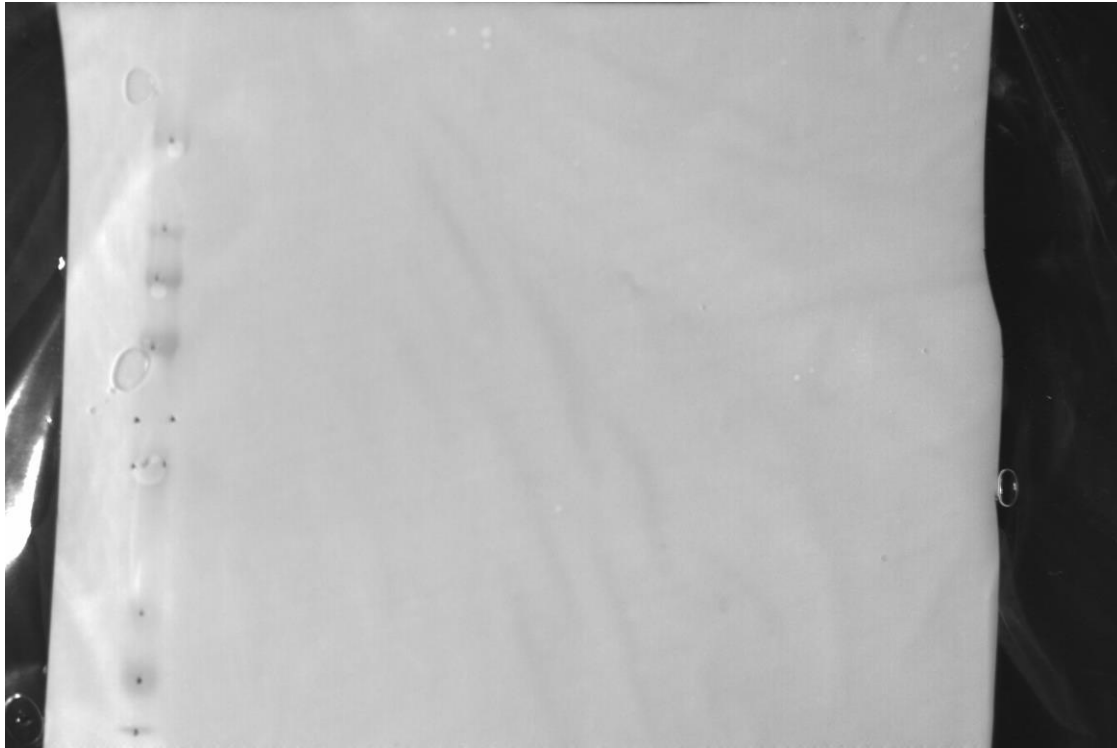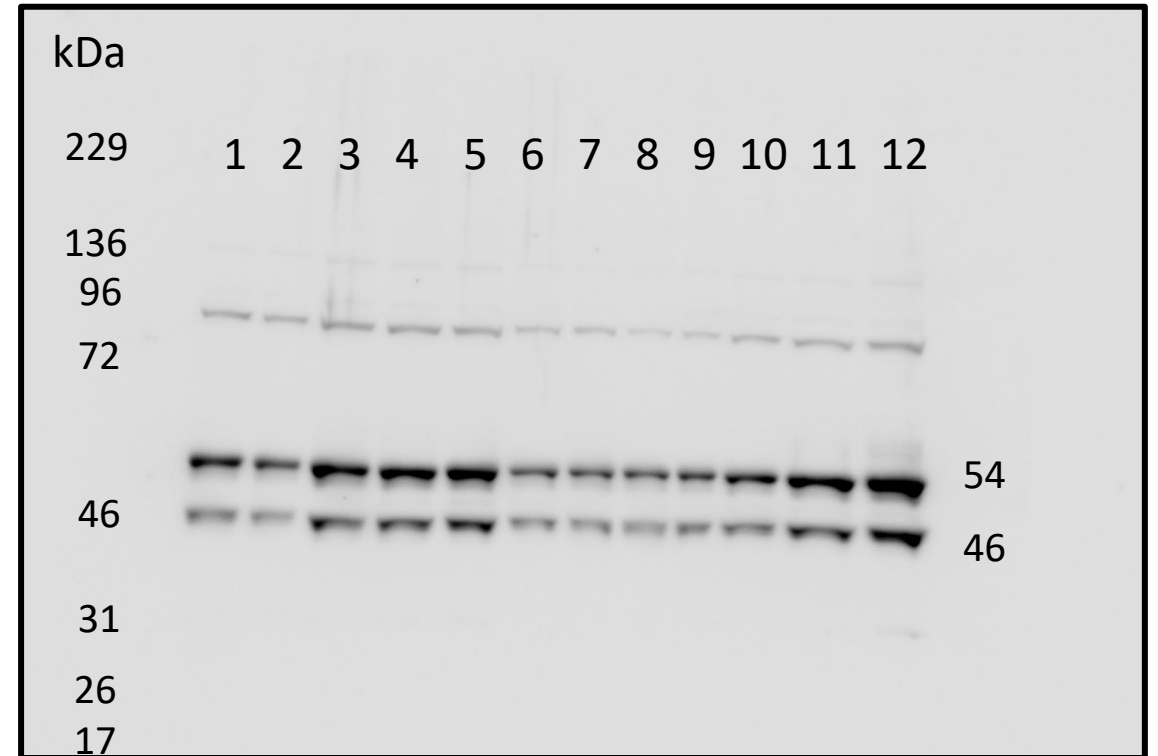

**54kDa:**27:14:43:40:44:12:12:12:12:21:46:100

**46kDa:**9:5:16:14:20:6:5:5:6:9:14:37

# LM8 6 h 12 h treatment p-p38

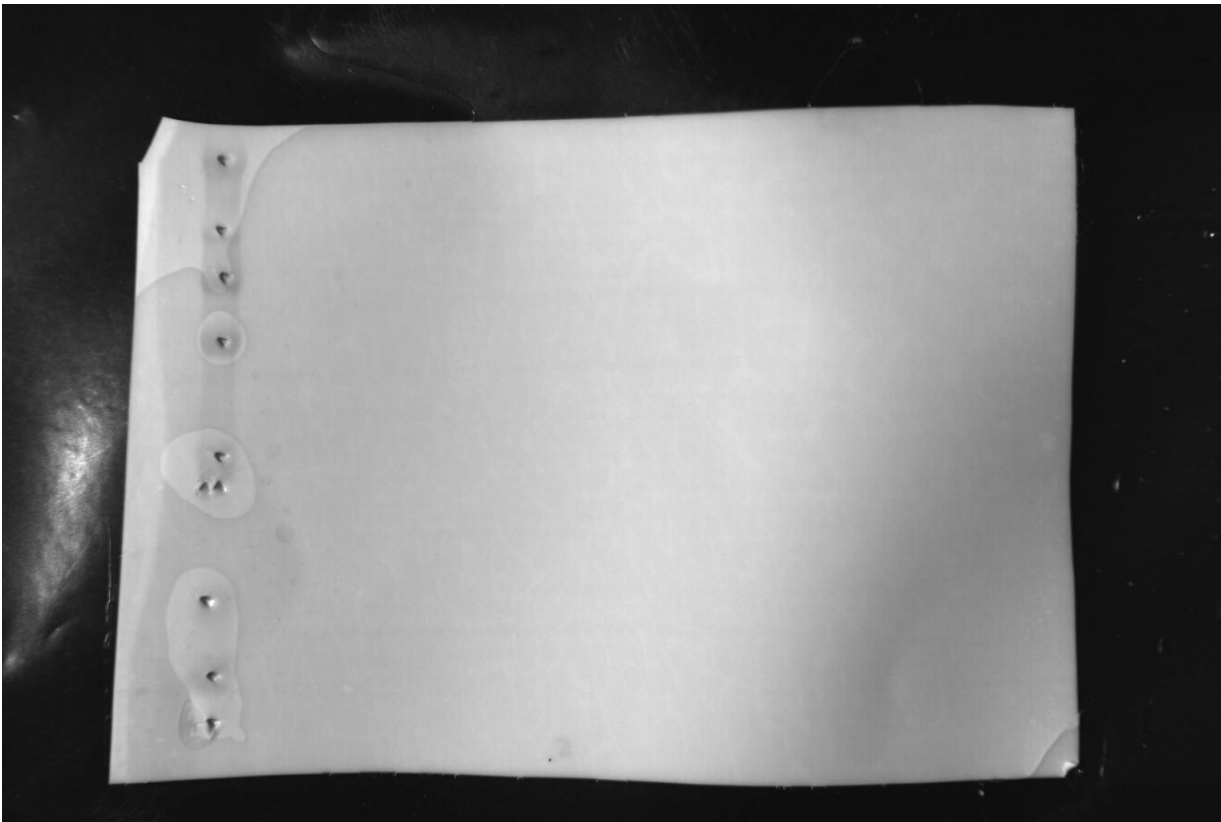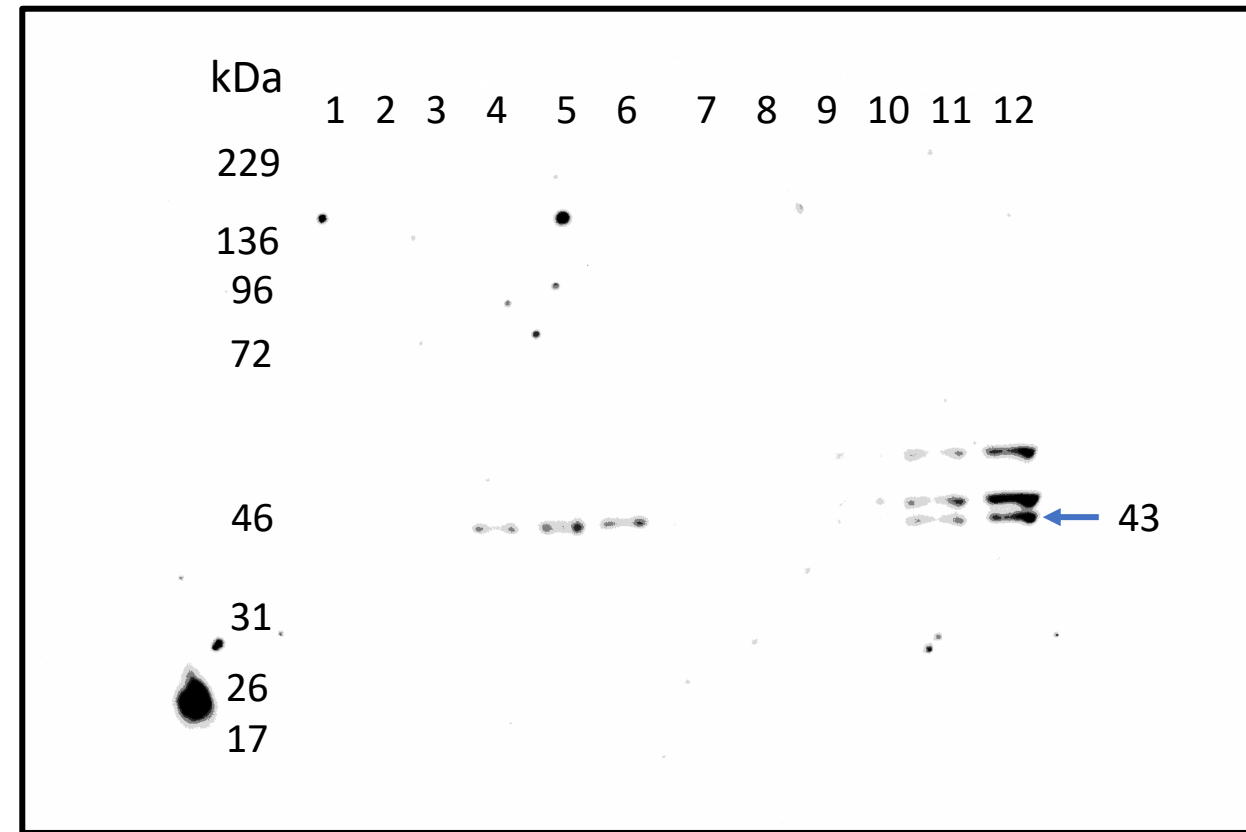

43kDa:0:0:0:13:36:25:0:0:0:0:19:100

# LM8 6 h 12 h treatment p38

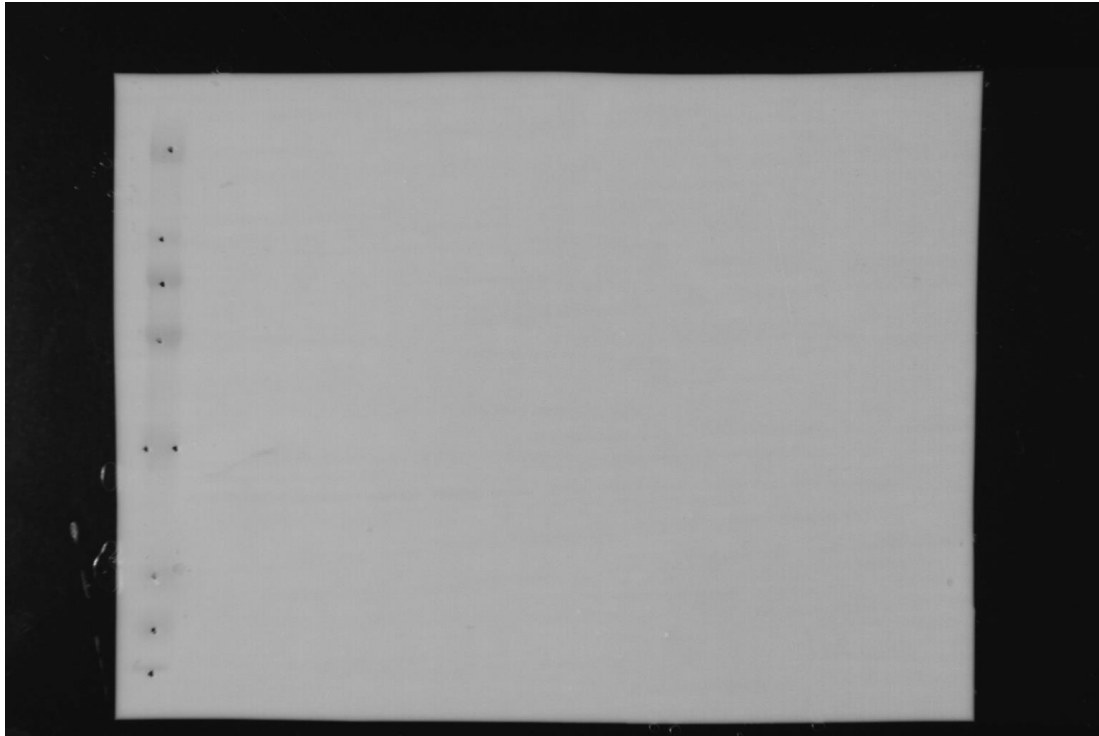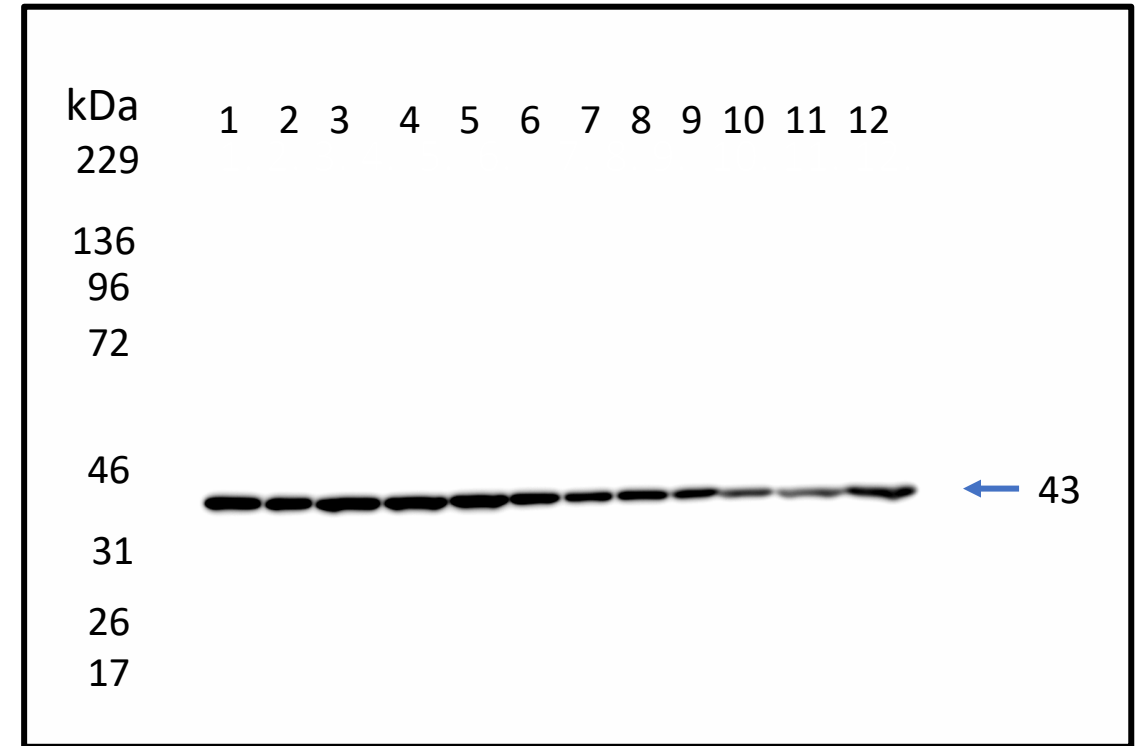

**43kDa:**100:55:106:112:104:60:39:47:29:17:14:41

# LM8 6 h 12 h treatment MYC

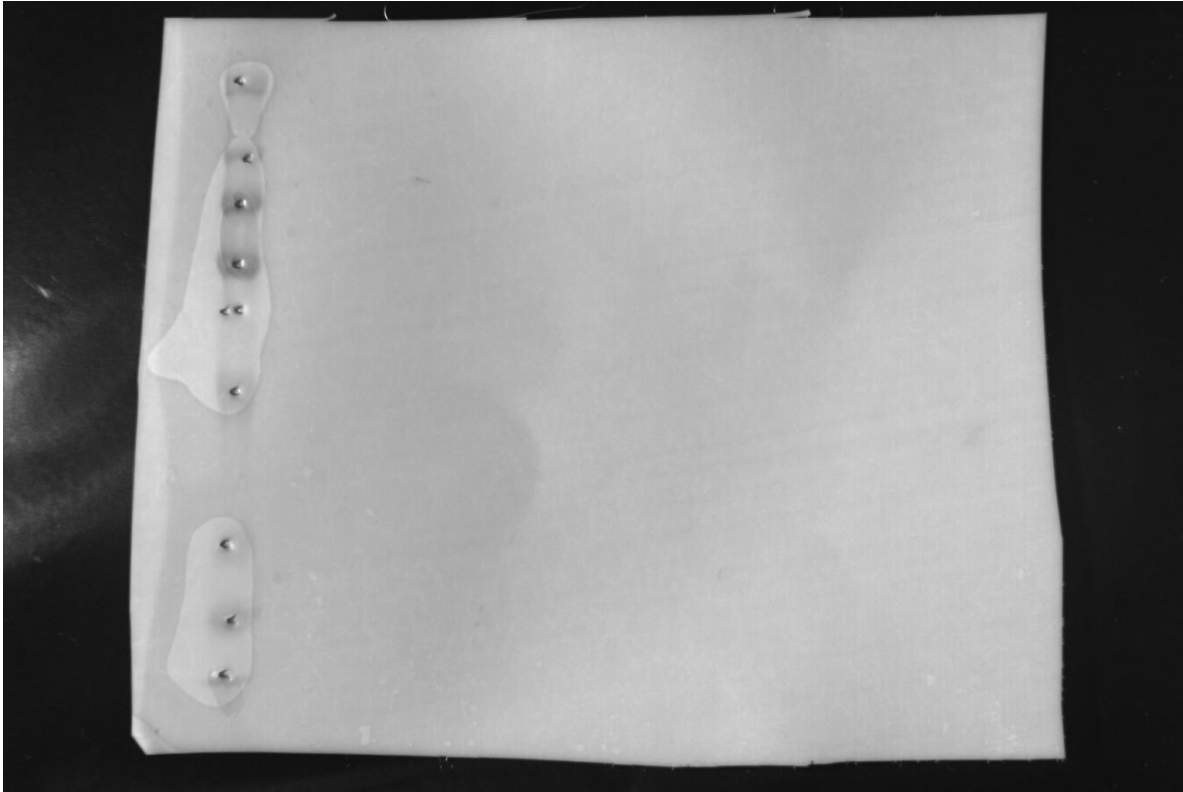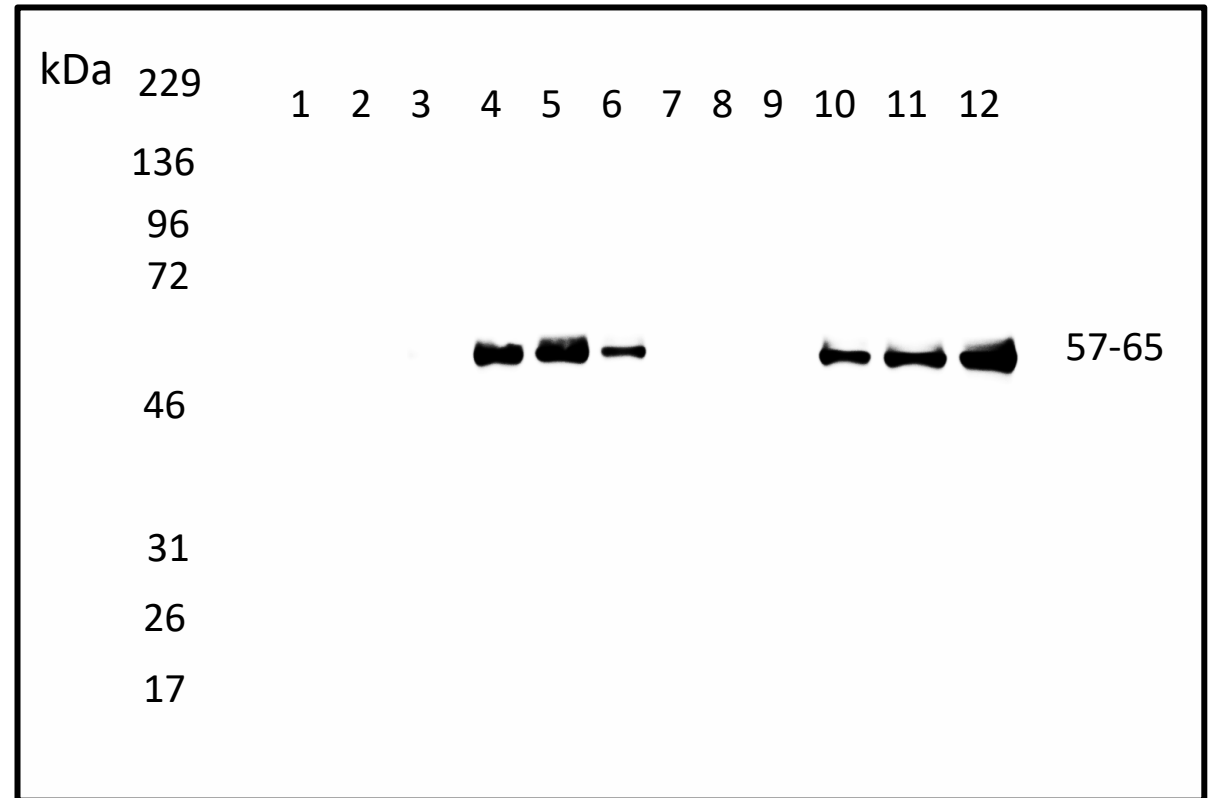

57-65kDa:0:0:0:47:82:17:0:0:0:34:62:100

# LM8 6 h 12 h treatment Survivin

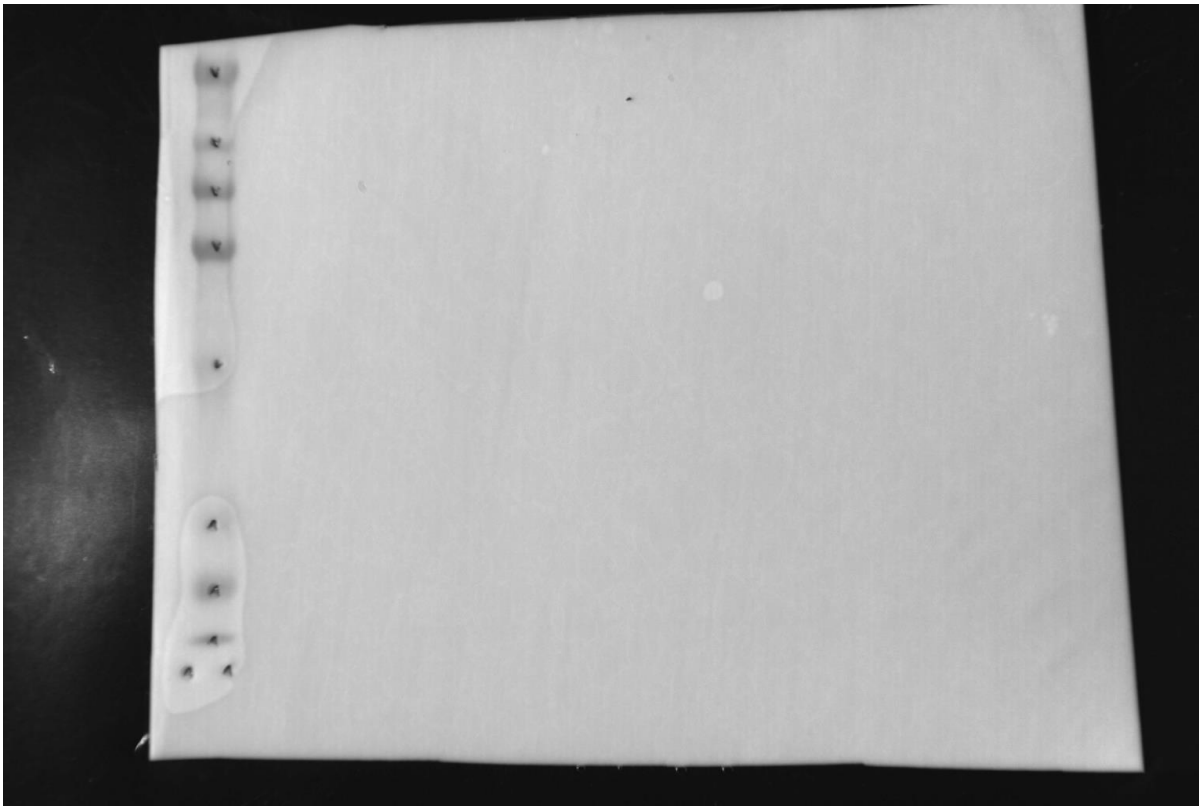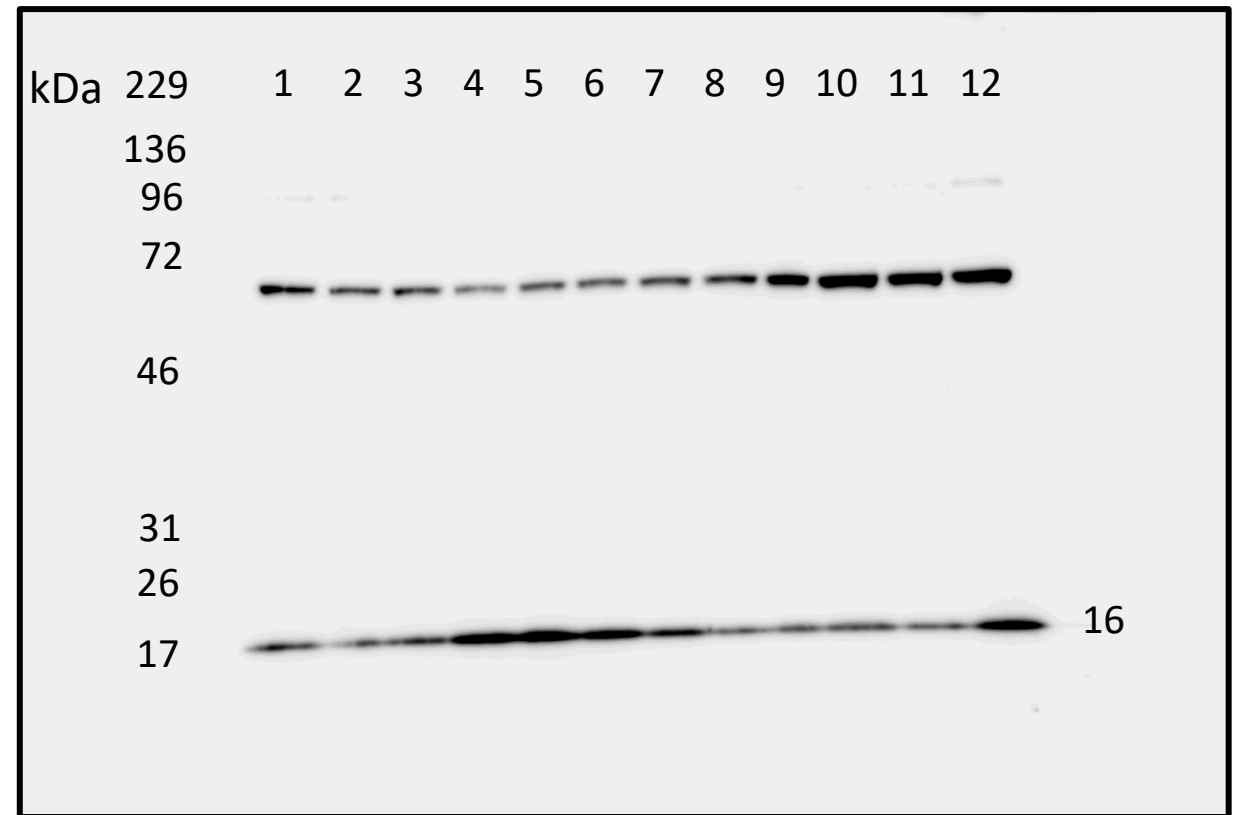

**16kDa:**100:55:102:228:571:422:209:101:73:89:71:215



# LM8 6 h 12 h treatment p-AKT

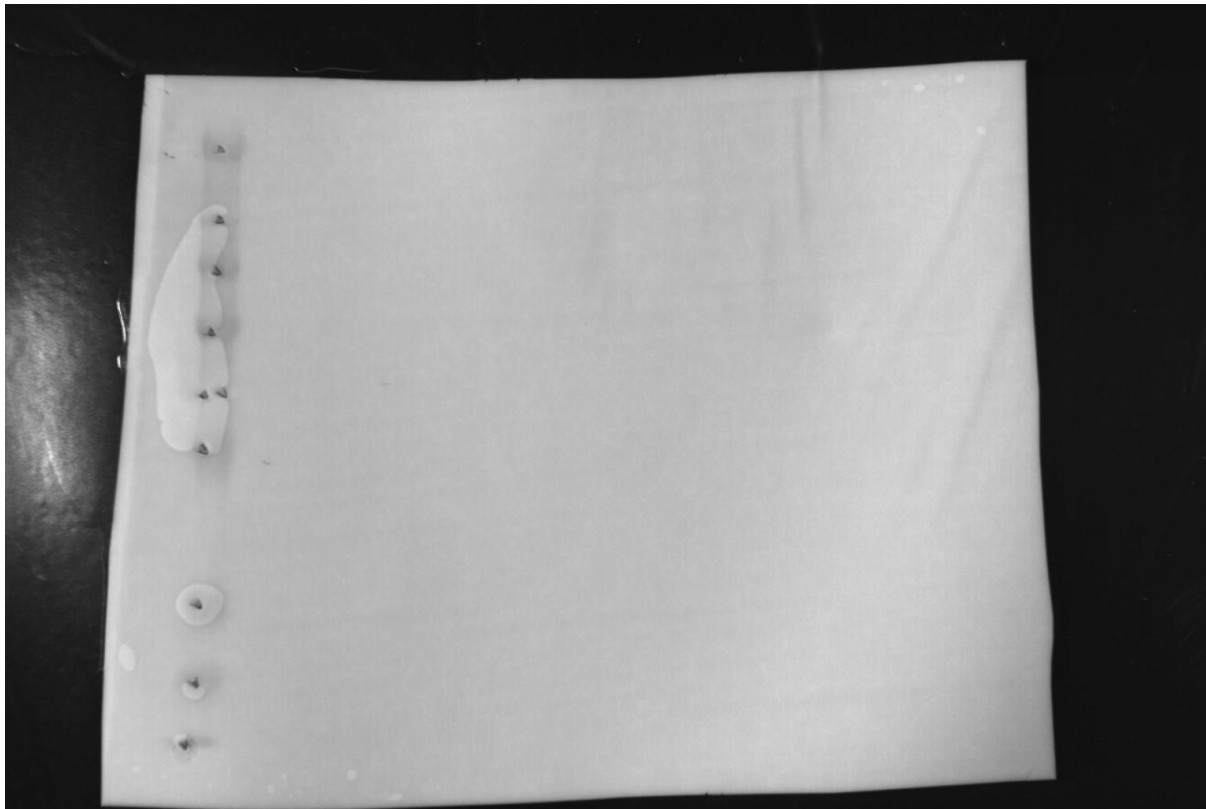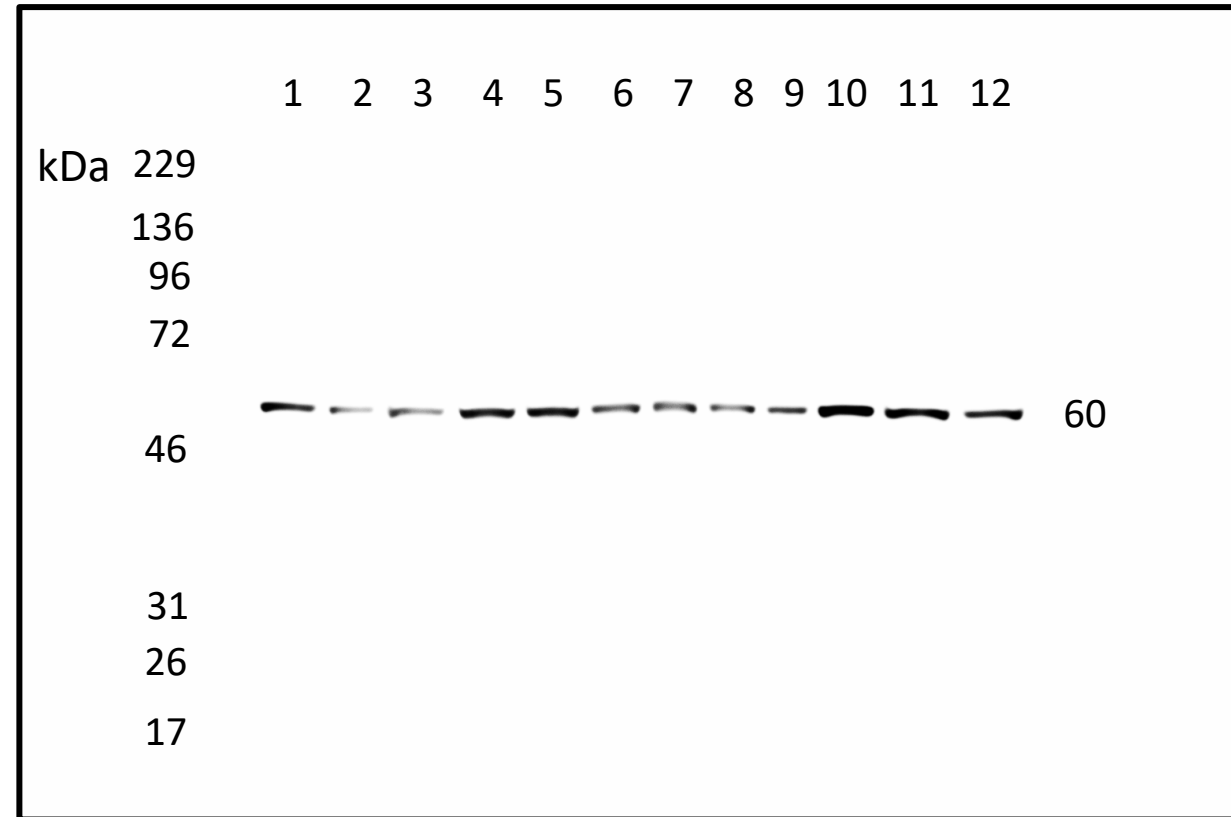

60kDa:100:17:32:129:128:50:45:33:38:236:191:117

# LM8 6 h 12 h treatment AKT

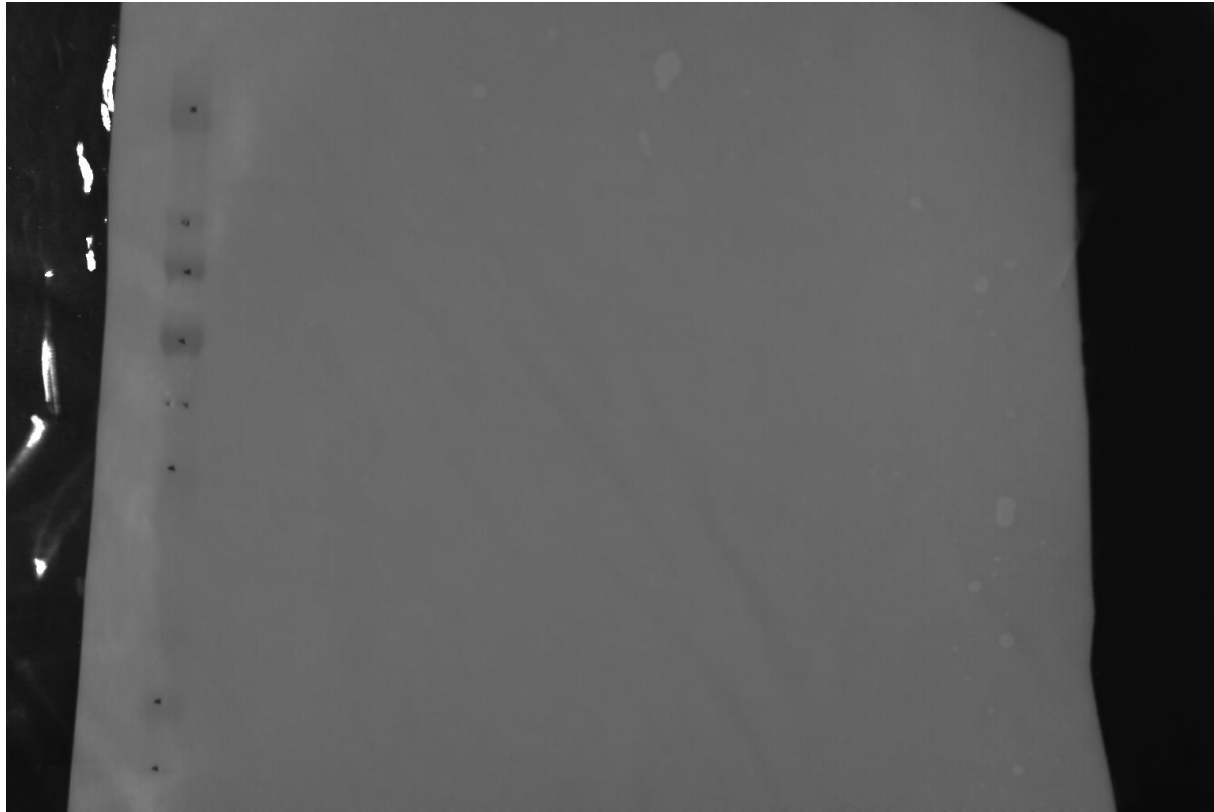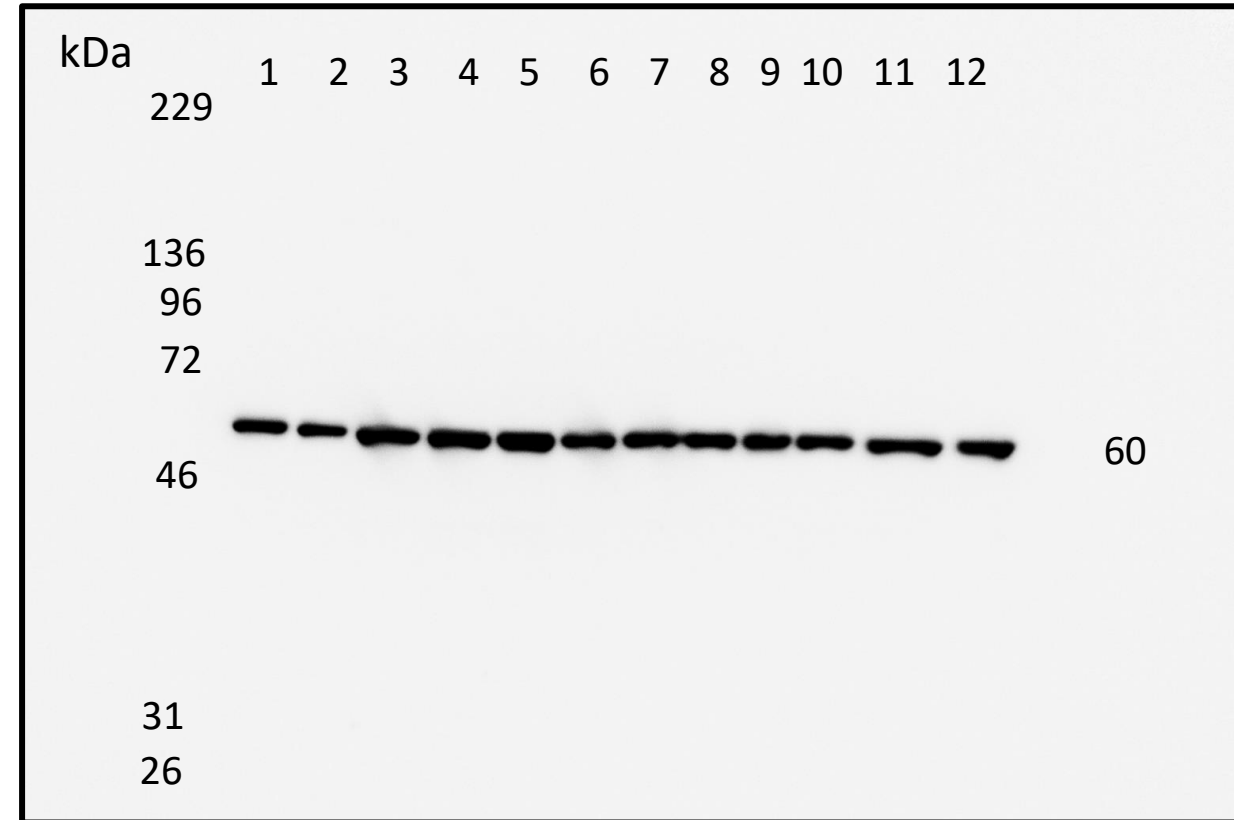

**60kDa:**100:66:166:175:150:110:119:104:87:104:113:121

# LM8 treatment 24h

Treatment time 24 h

- 1. Everolimus 0  $\mu\text{M}$
- 2. Everolimus 5  $\mu\text{M}$
- 3. Everolimus 10  $\mu\text{M}$
- 4. Everolimus 0  $\mu\text{M}$       Bortezomib 2.5nM
- 5. Everolimus 5  $\mu\text{M}$       Bortezomib 2.5nM
- 6. Everolimus 10  $\mu\text{M}$       Bortezomib 2.5nM

# LM8 24 h treatment $\beta$ actin

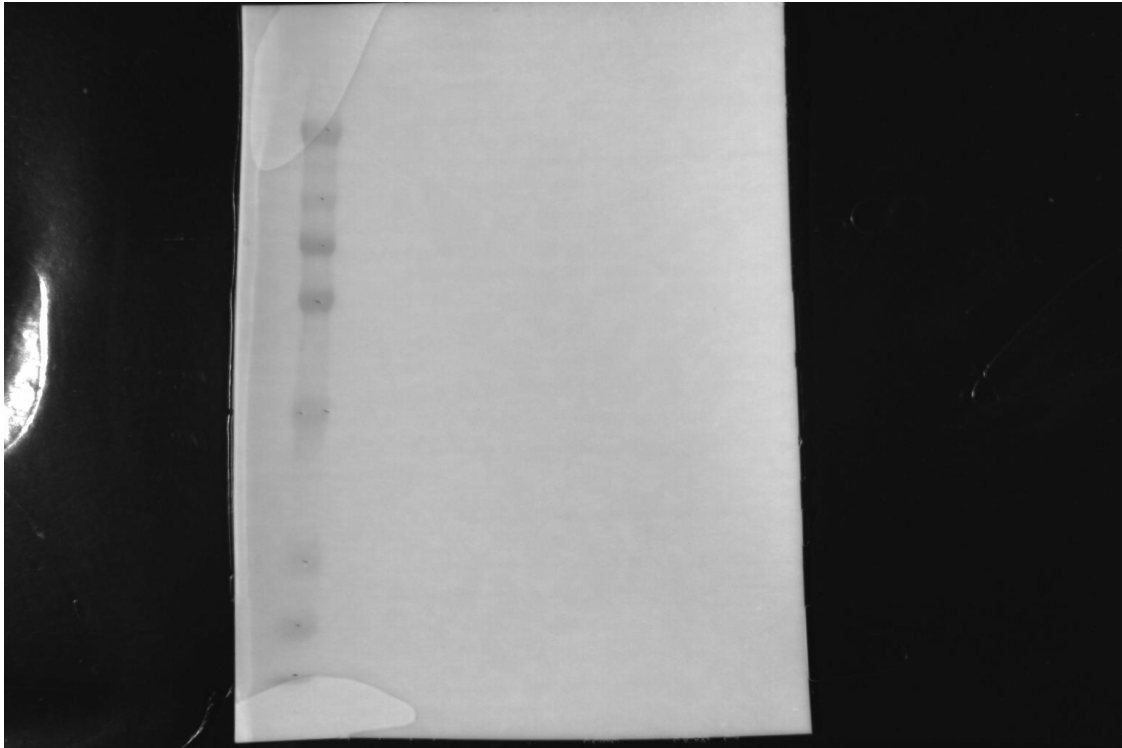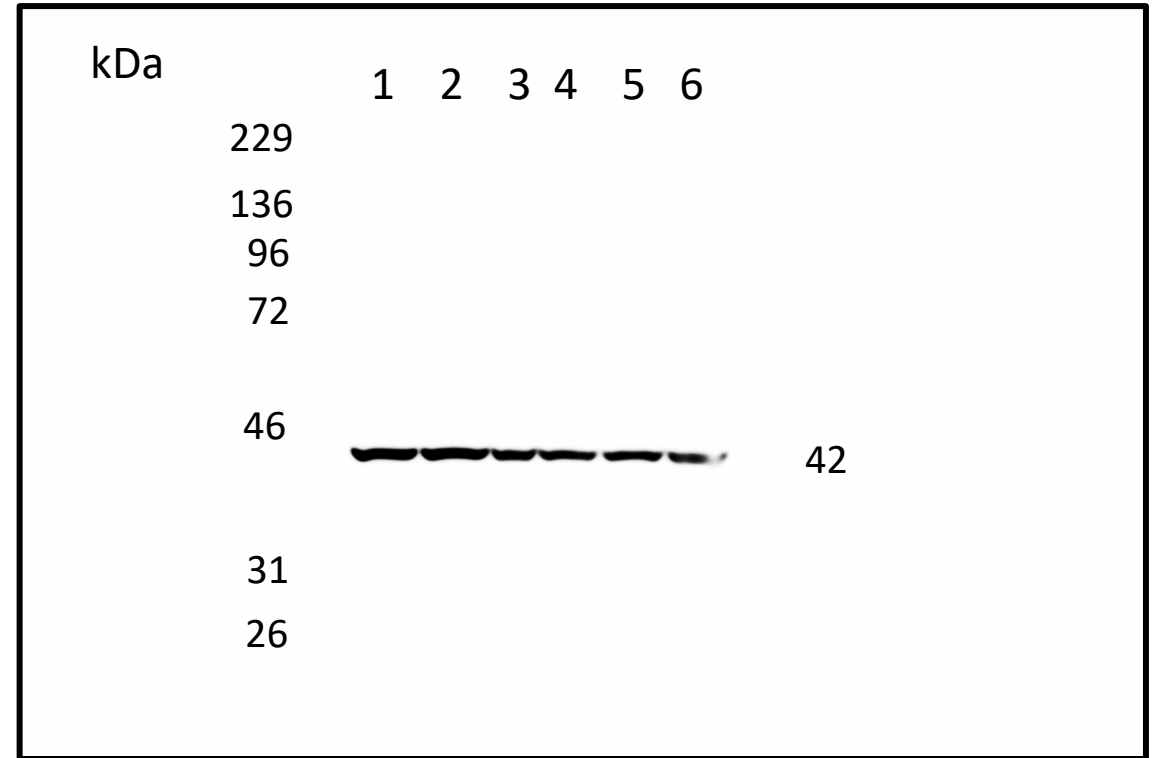

**42kDa:100:102:43:40:63:21**

# LM8 24 h treatment cleaved caspase 3

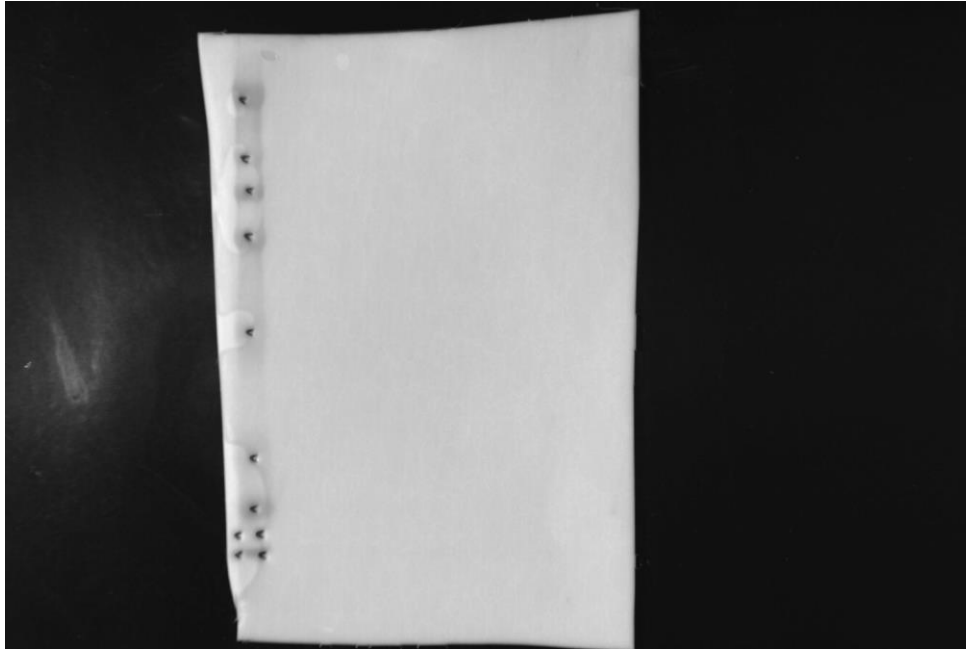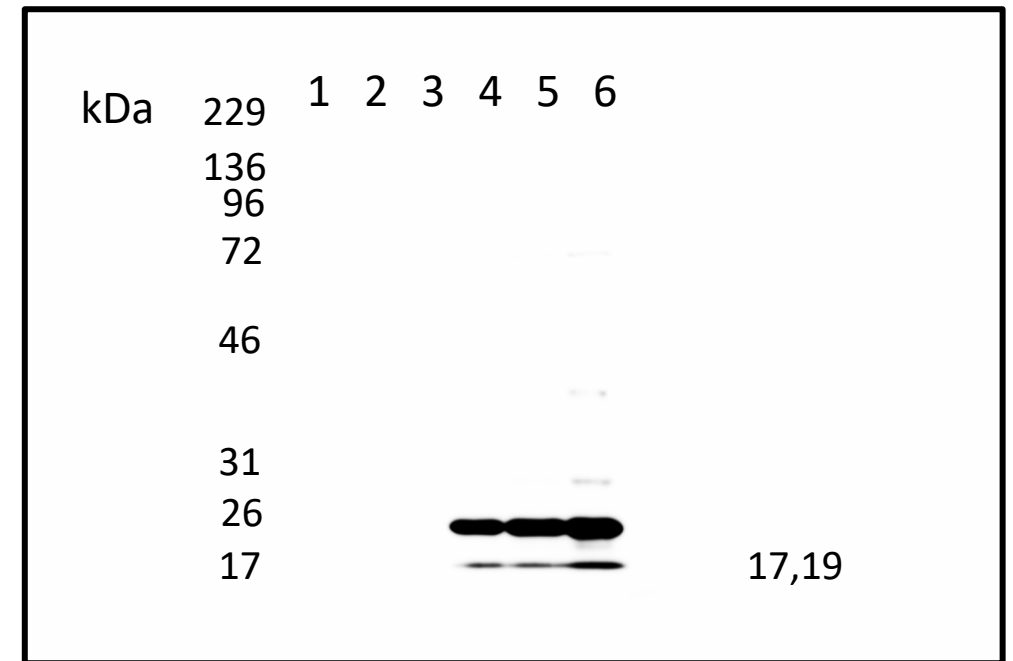

17,19Da:0:0:0:22:25:100

# LM8 24h treatment cleaved PARP

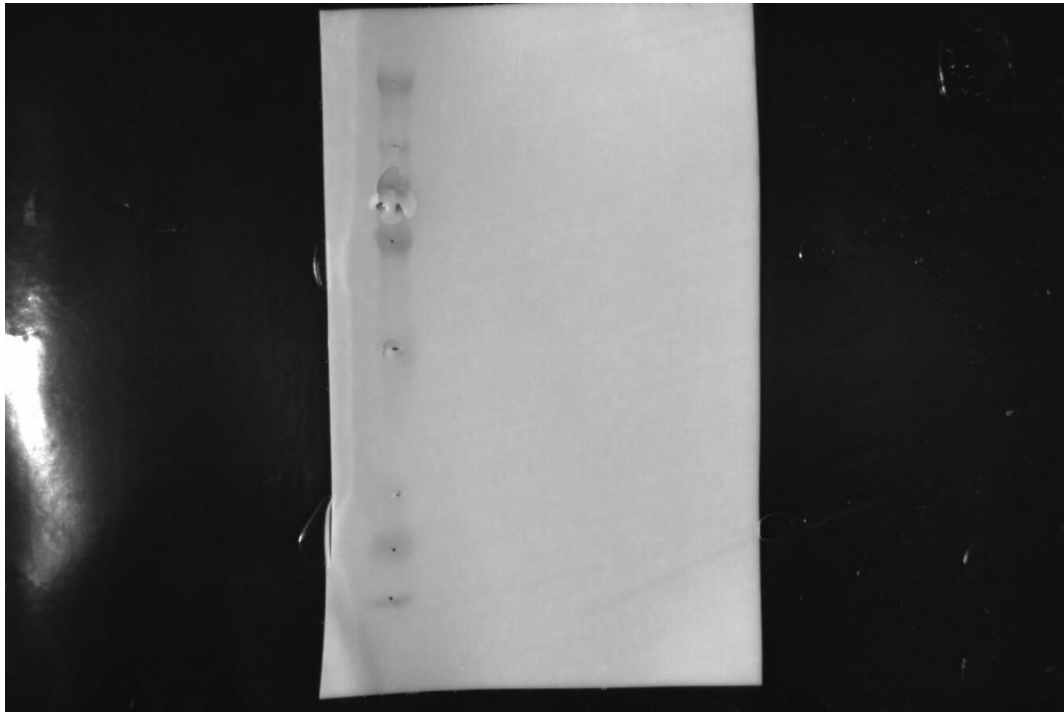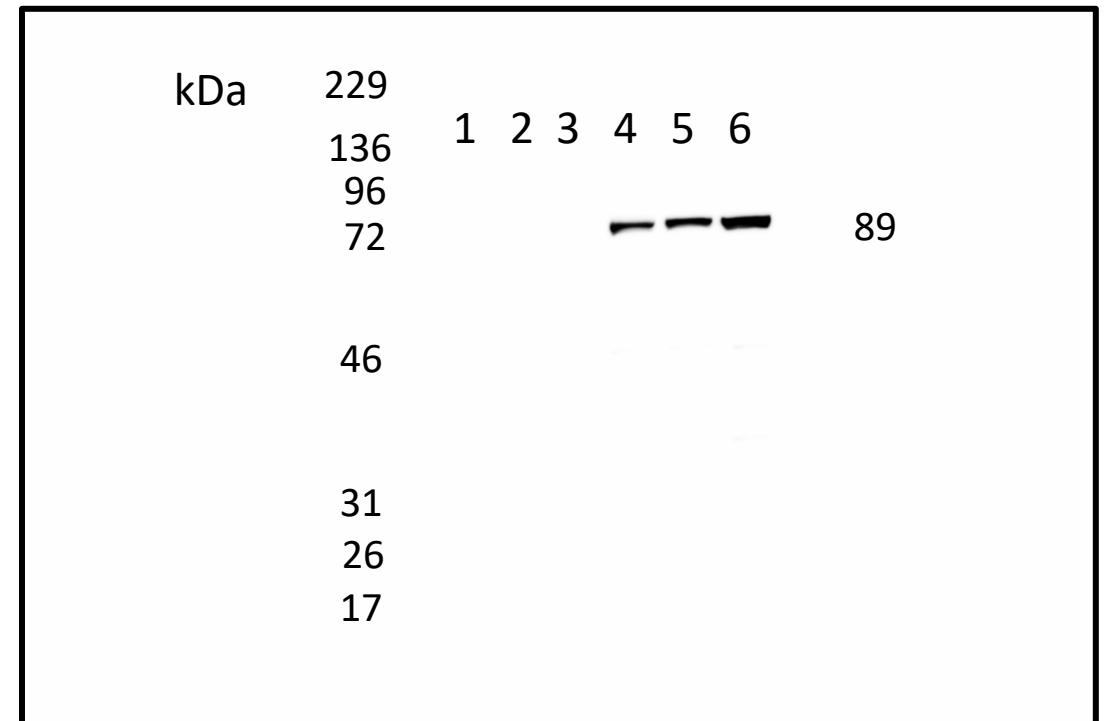

**89Da:0:0:0:31:51:100**

# LM8 24h treatment p-ERK

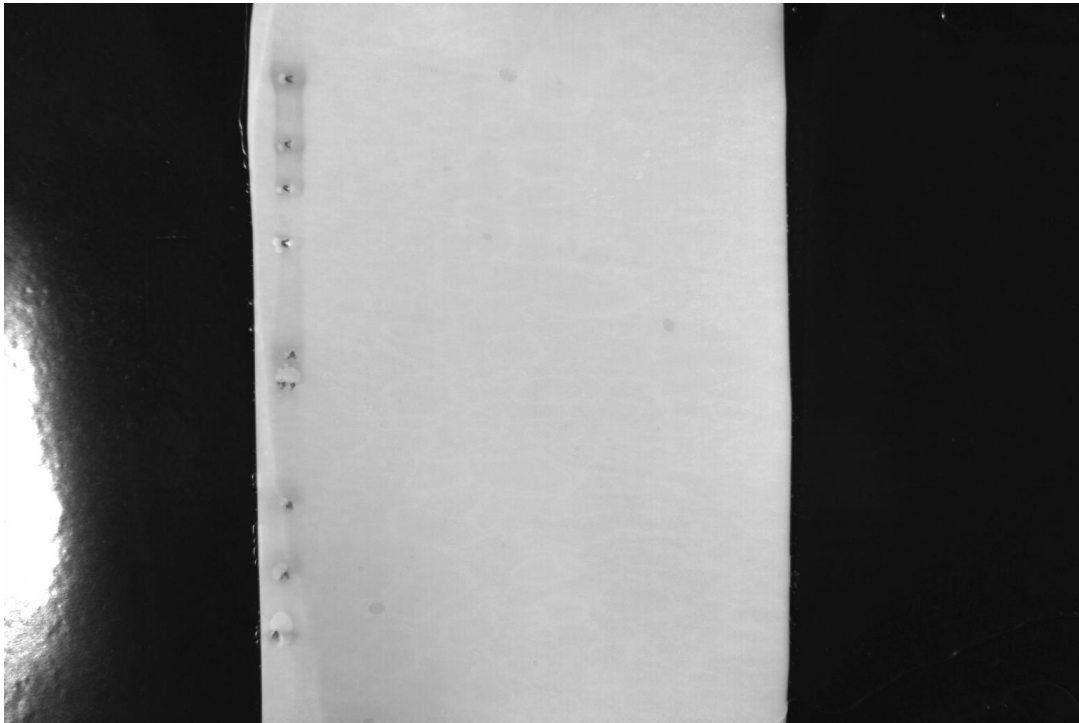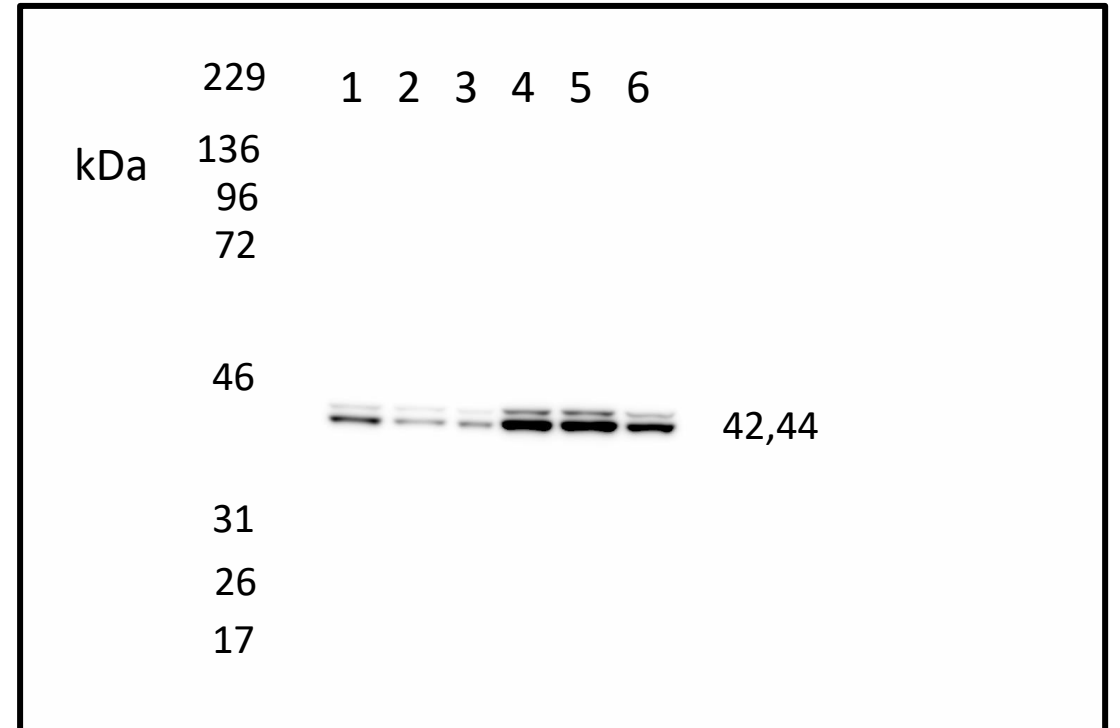

**42,44Da:100:23:29:481:565:329**

# LM8 24h treatment ERK

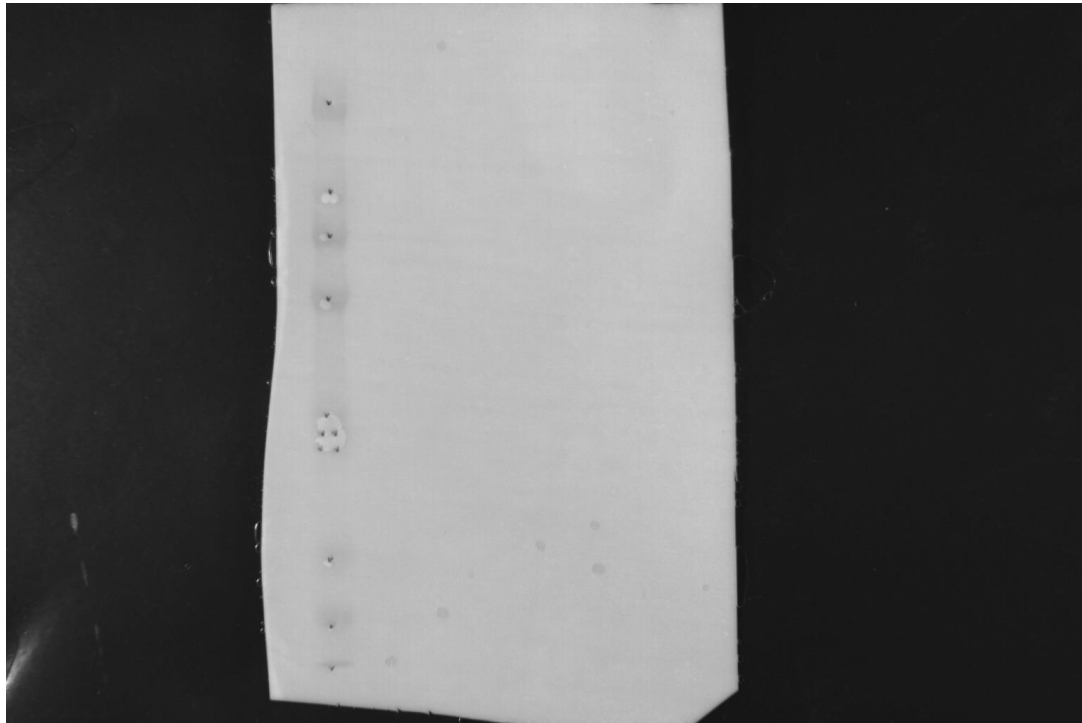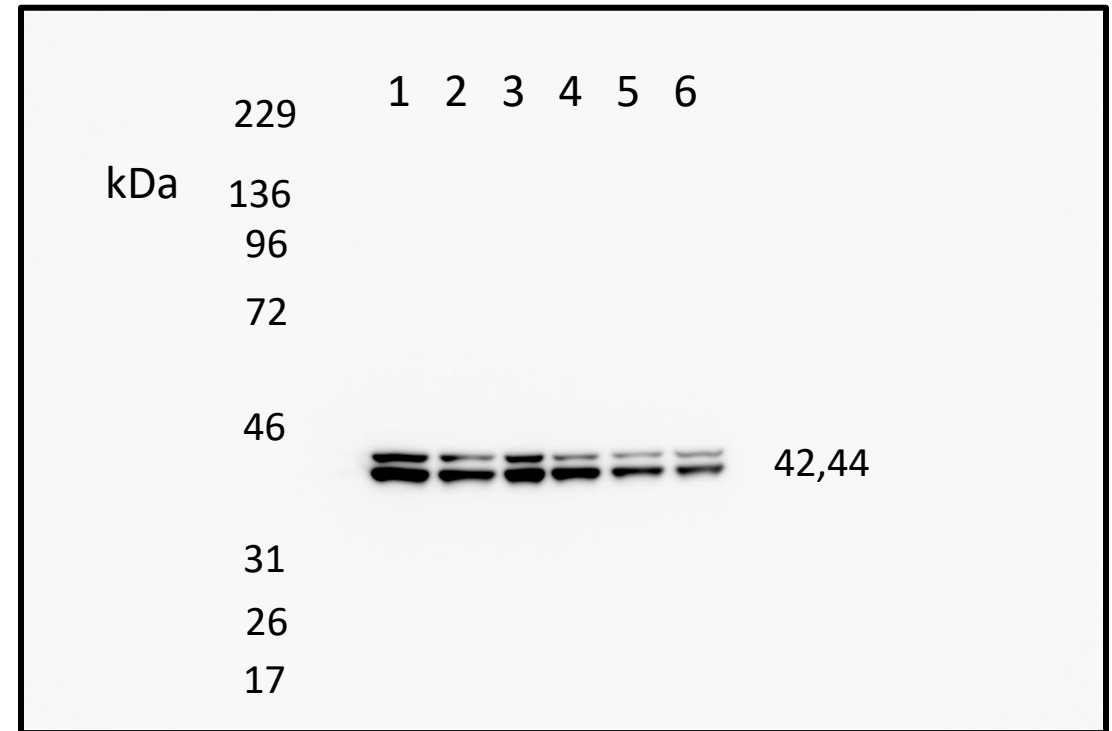

**42,44Da:100:47:37:47:28:18**



LM8 24 h treatment p-JNK

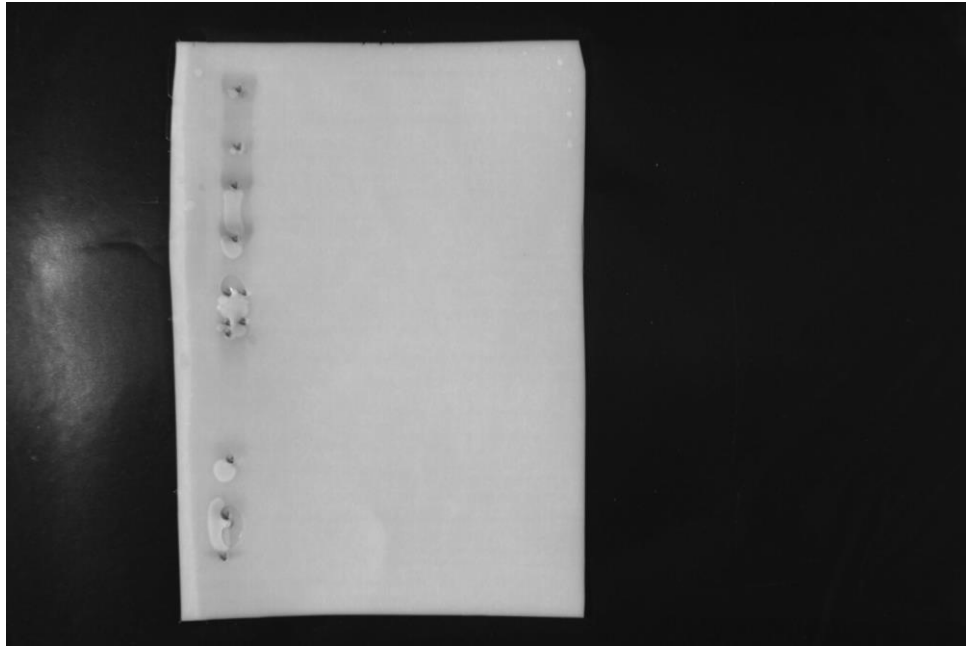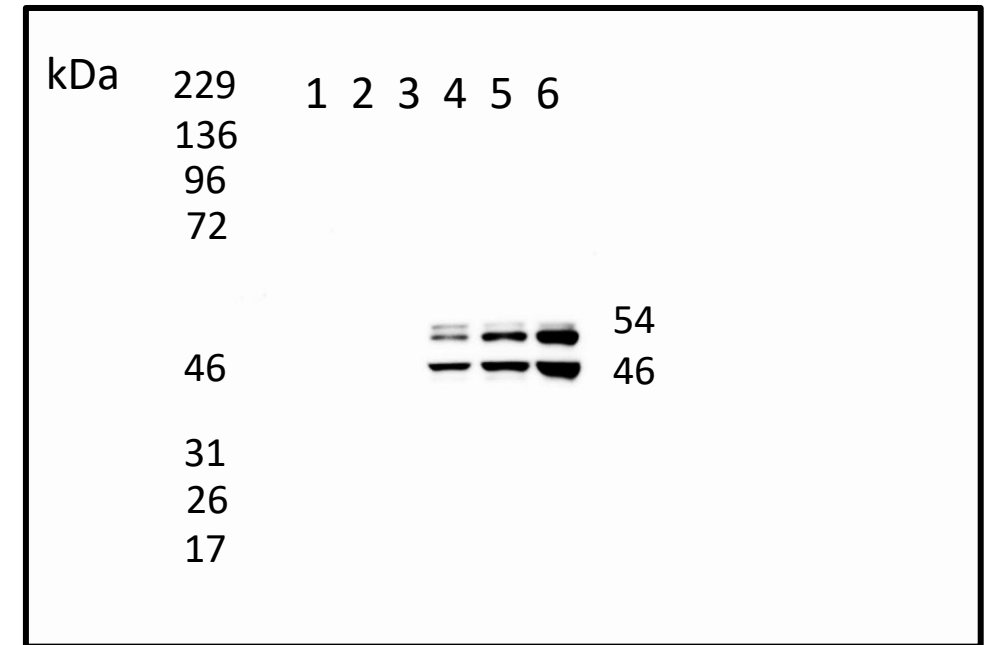

**54kDa:0:0:0:18:51:100**

46kDa:0:0:0:41:65:99

# LM8 24 h treatment JNK

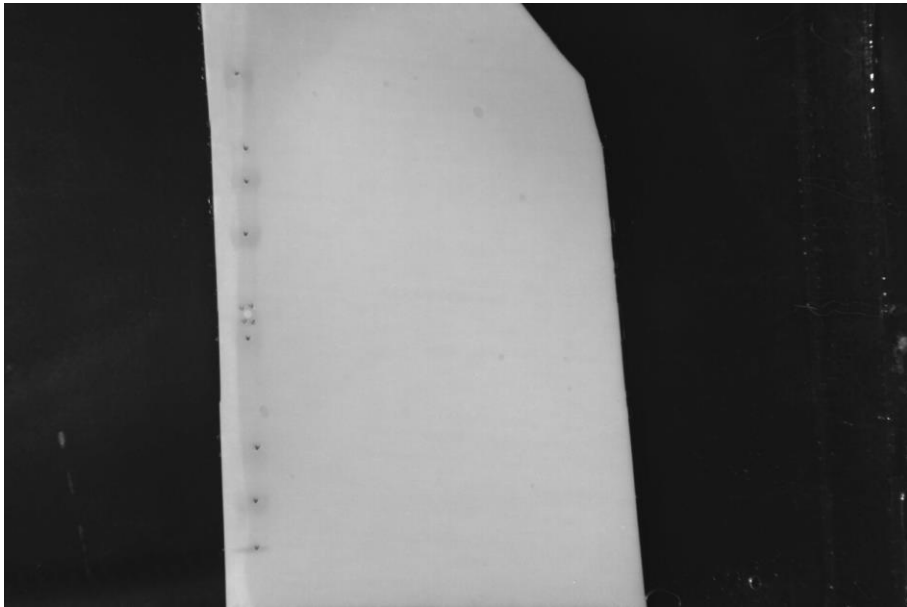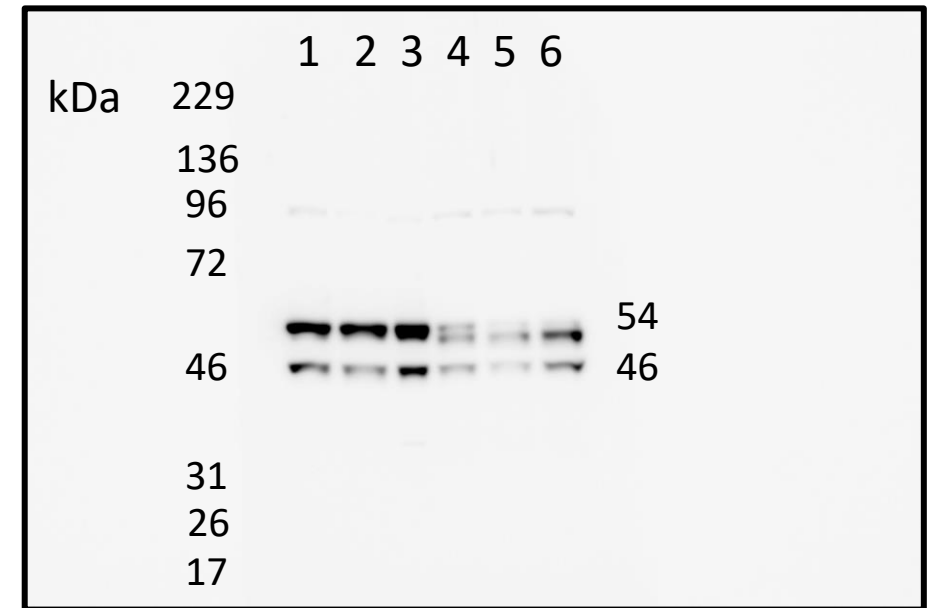

**54kDa:**225:273:220:46:25:100

**46kDa:**68:36:86:20:7:43

# LM8 24 h treatment p-p38

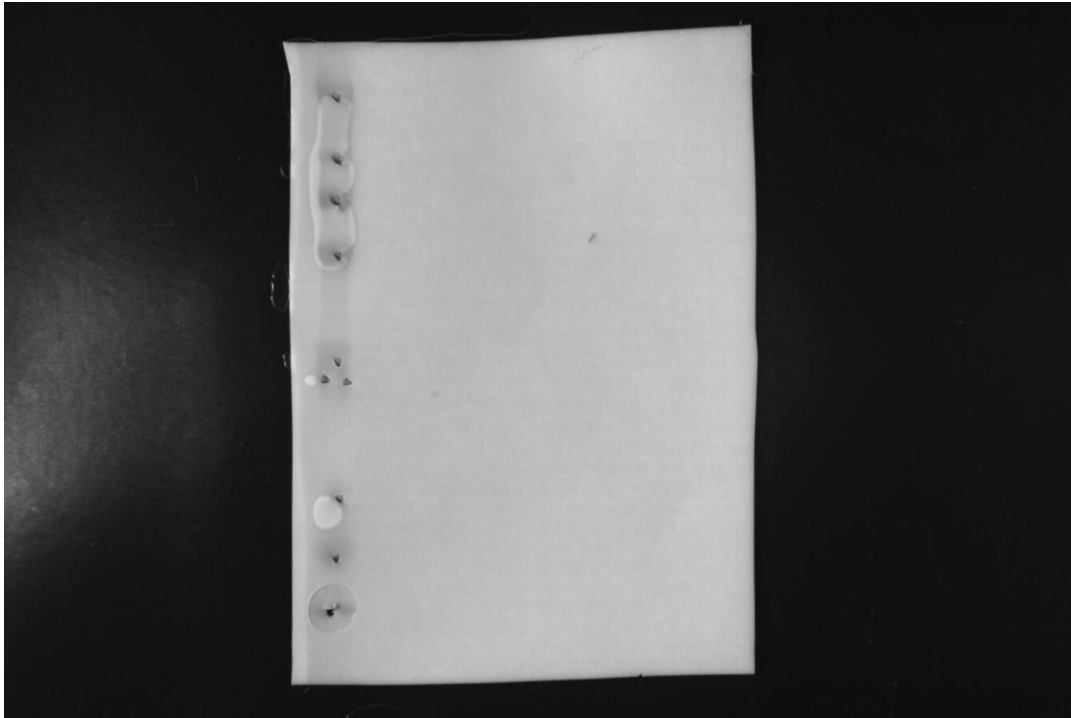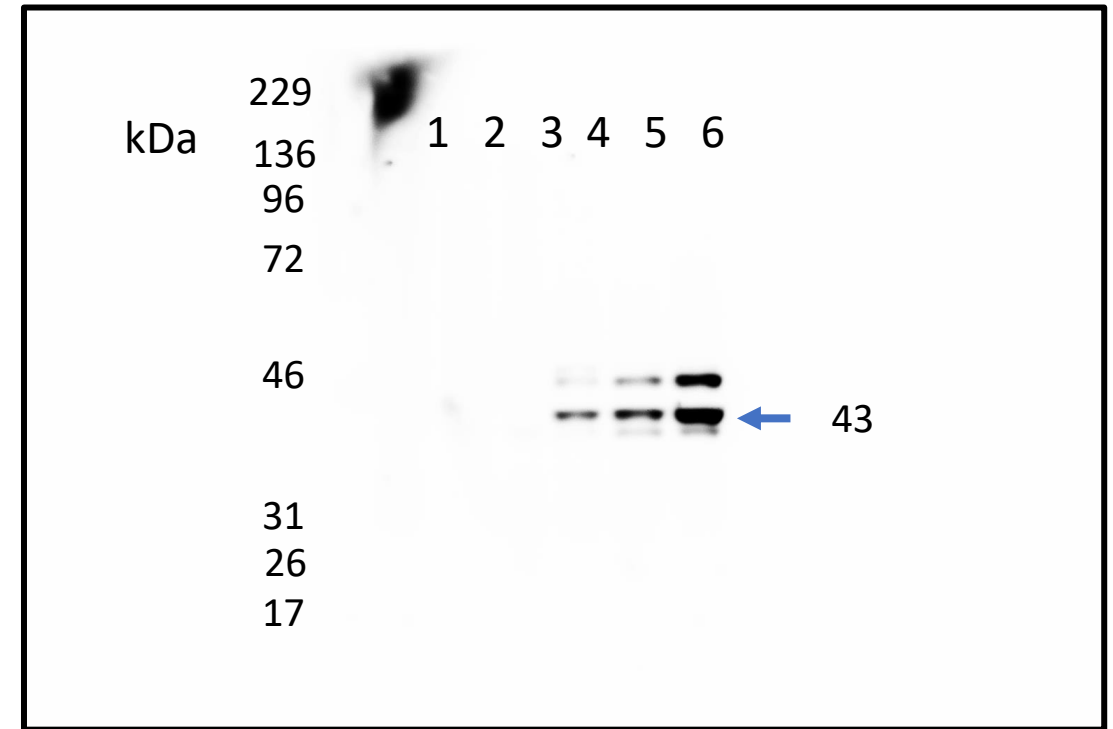

43kDa:0:0:0:9:24:100

# LM8 24 h treatment p38

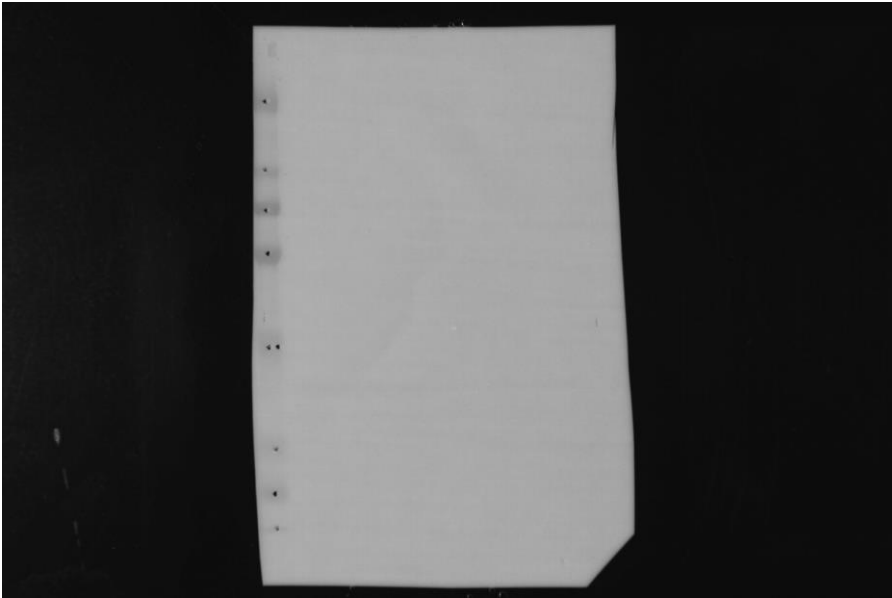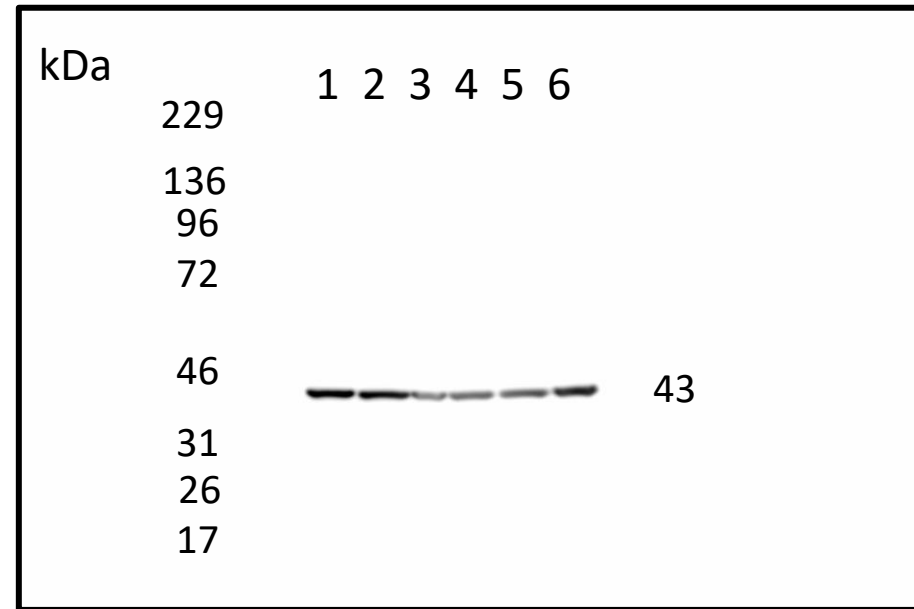

**43kDa:203:117:34:42:49:100**

# LM8 24 h treatment MYC

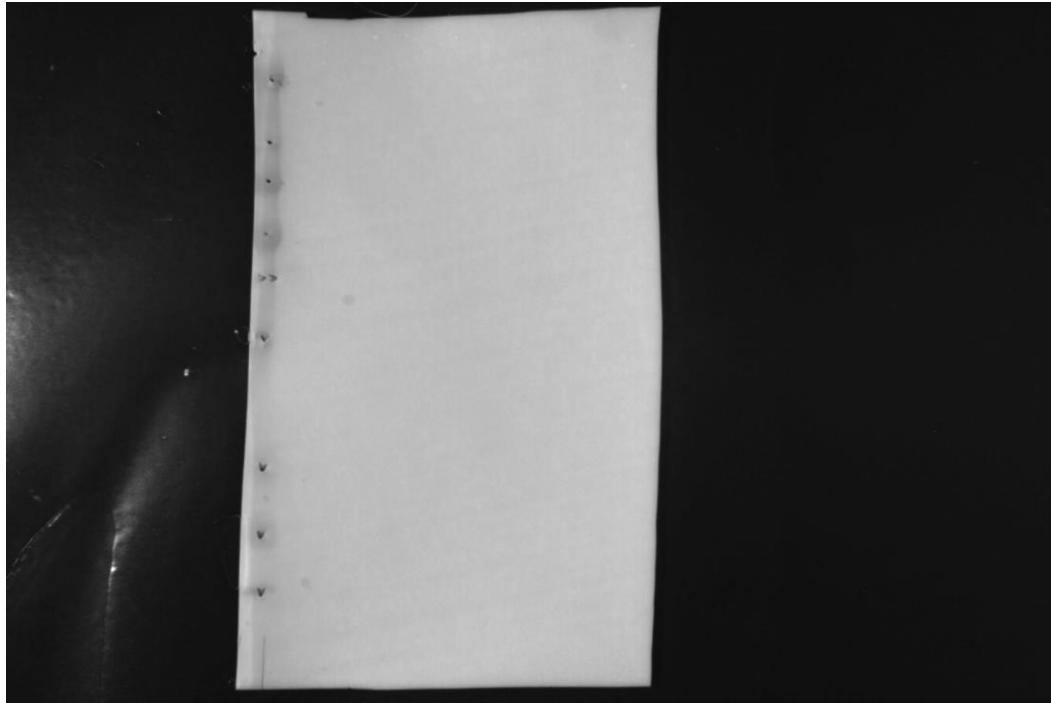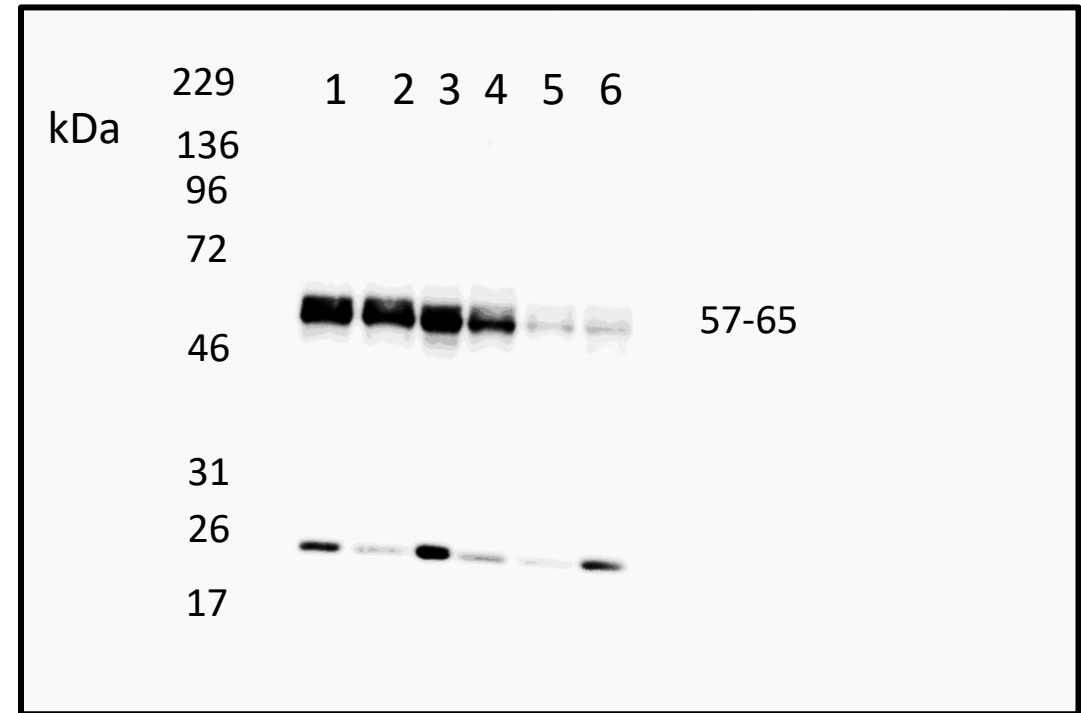

57-65kDa:100:87:74:46:4:4

# LM8 24 h treatment Survivin

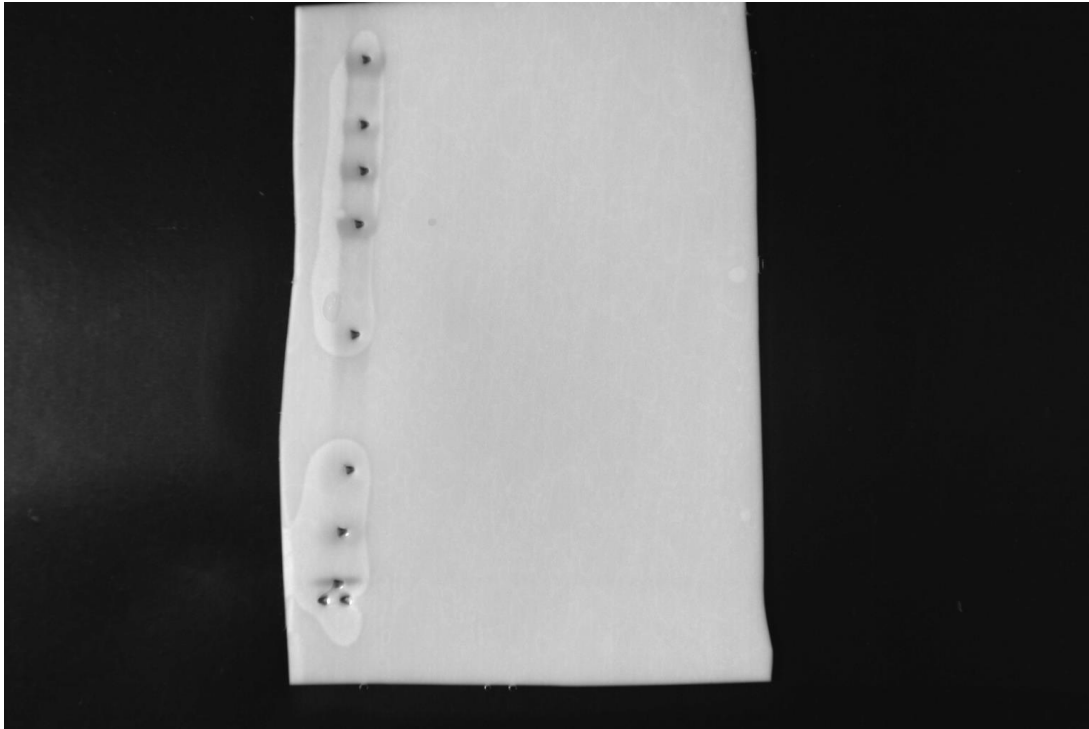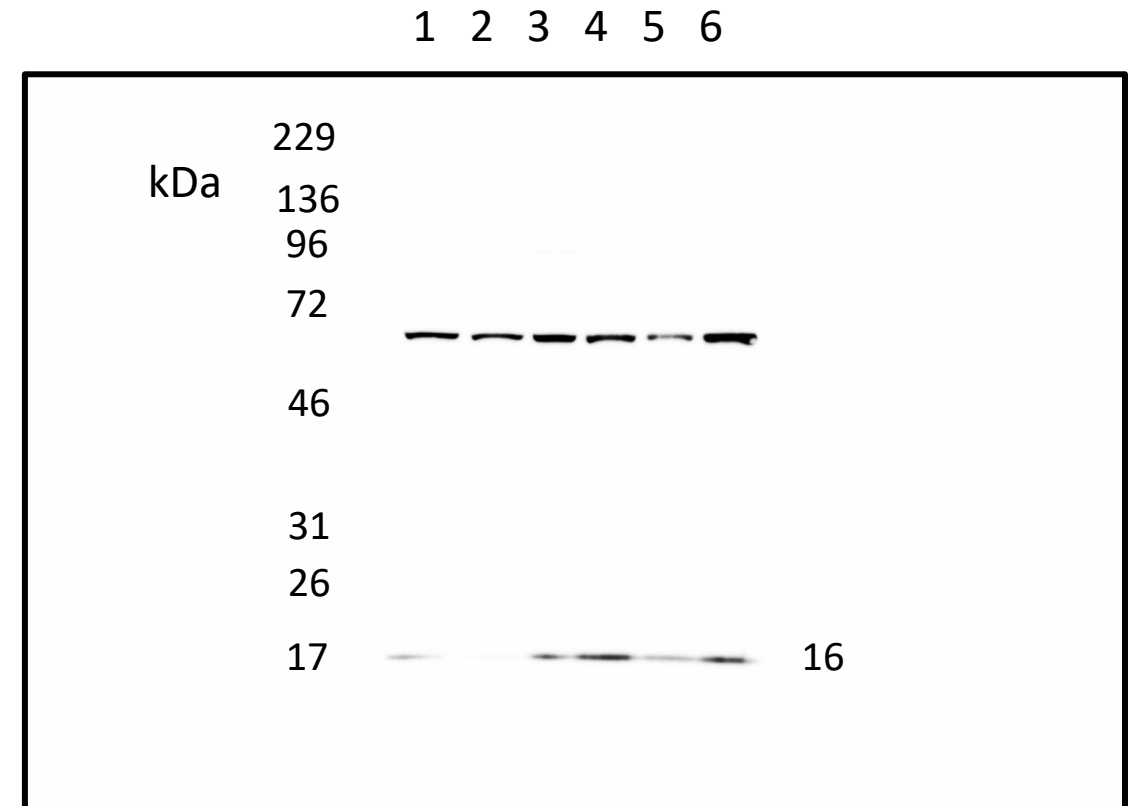

16kDa:17:1:41:127:27:100

# LM8 24 h treatment p-AKT

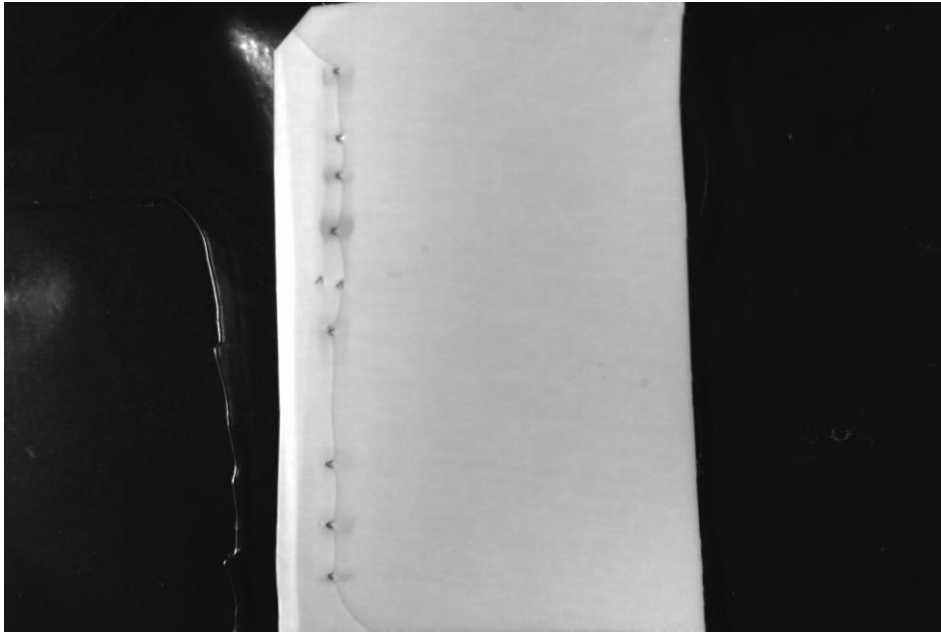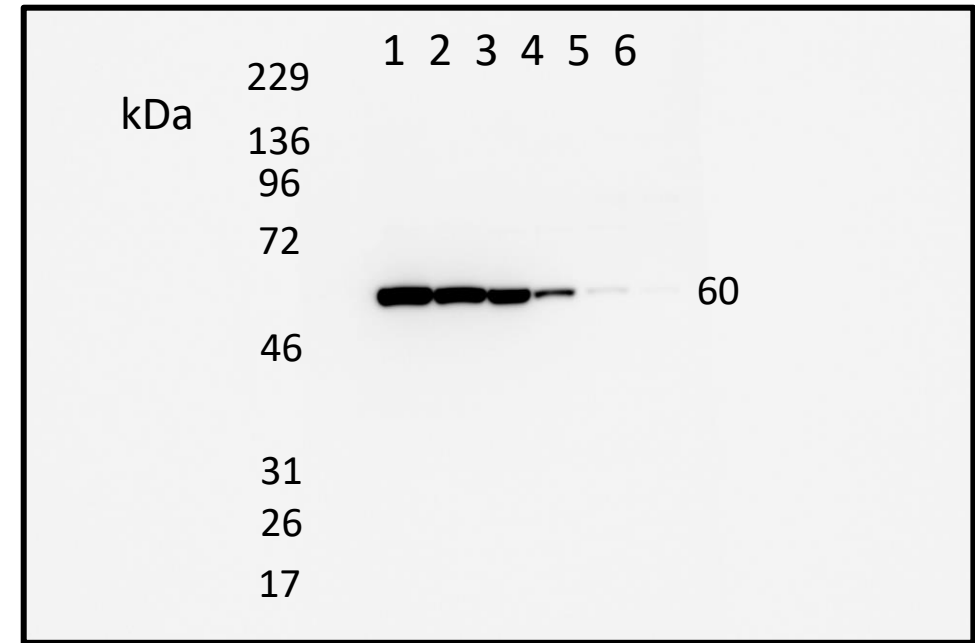

60kDa:100:78:59:13:0.3:0

# LM8 24 h treatment AKT

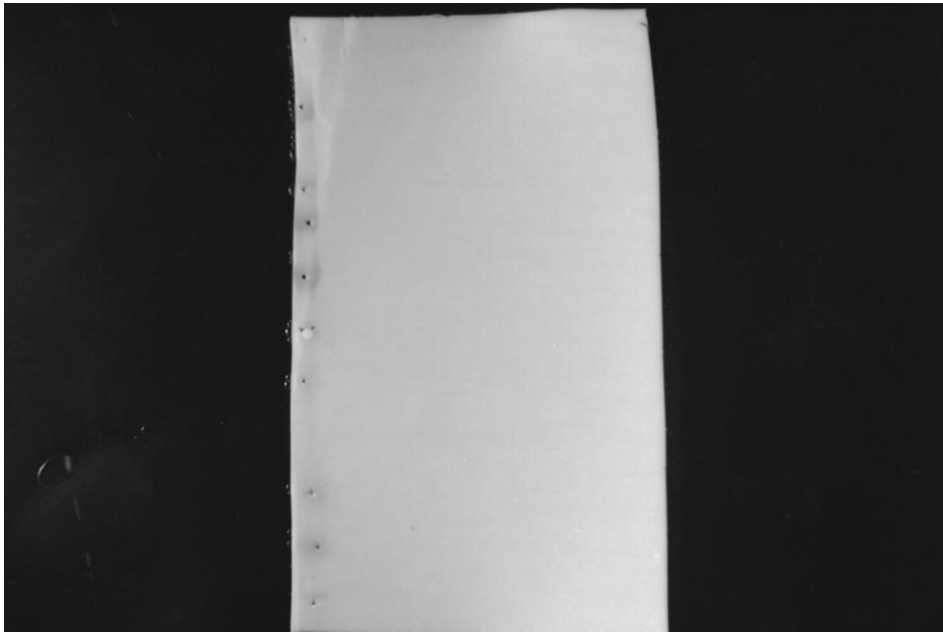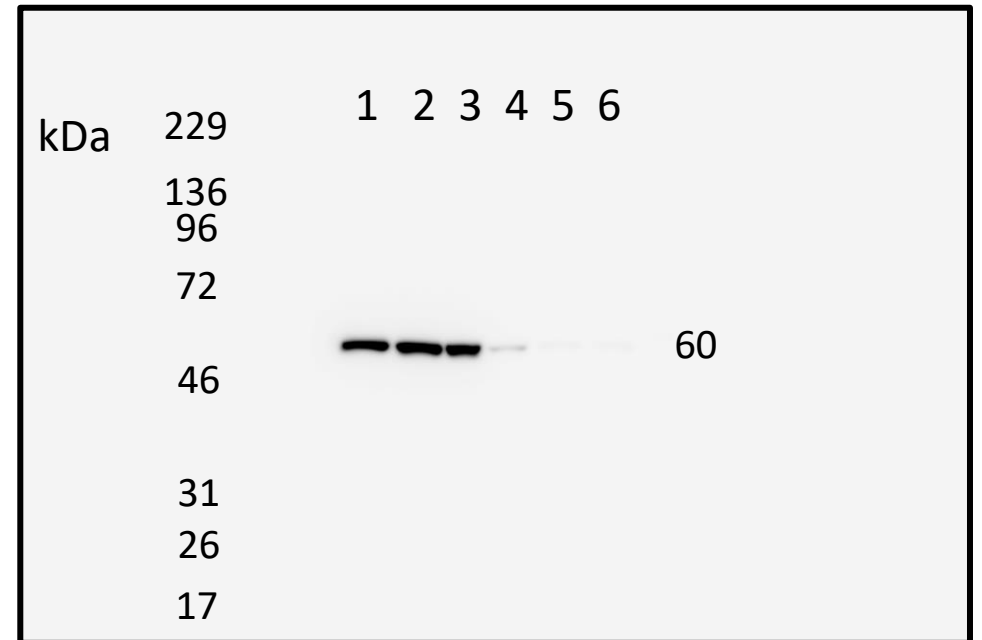

60kDa:100:112:53:2:0:0
